# Supplementary material for: Giant, swimming mouths: oral dimensions of extant sharks do not accurately predict body size in Dunkleosteus terrelli (Placodermi: Arthrodira)
Source: PeerJ. 2023 Apr 10;11:e15131. doi: 10.7717/peerj.15131 (PMC10100833; doi:10.7717/peerj.15131)
Supplement: Supplemental Information 1 — Morphometric data used in the present study, including total length, head length, mouth width, and mouth length. References used in this file can be found in File S9. [file peerj-11-15131-s001.xlsx]

## Sheet: Sheet 1
Genus	Species	Clade	Order	Family	Shape	Extinct	Total Length (cm)	Precaudal Length (cm)	Head Length (cm)	Prebranchial Length (cm)	Mouth Length (cm)	Mouth Width (cm)	Inner Mouth Width (cm)	UJP (cm)	Ontogenetic Status	Specimen	Notes	Reference
Africanaspis	dorissa	Placodermi	Arthrodira	Groenlandaspidae	fusiform	TRUE	23		4.583							Gess and Trinajstic 2017		Gess and Trinajstic 2017
Amazichthys	trinajsticae	Placodermi	Arthrodira	Selenosteidae	elongate	TRUE	89.7	69.62	13.58			11.05				AA.MEM.DS.8		Jobbins et al. 2022
Bungartius	perissus	Placodermi	Arthrodira	unknown	fusiform	TRUE			33		17.27					CMNH 7573		Dunkle 1947, Present Study
Coccosteus	cuspidatus	Placodermi	Arthrodira	Coccosteidae	fusiform	TRUE	39.4	26.9	7.08		2.64	6.871	6.099	9.78		Recon. (M & W 1968)		Miles and Westoll 1968
Coccosteus	cuspidatus	Placodermi	Arthrodira	Coccosteidae	fusiform	TRUE	34.39		7.12							NMS 1900.12.12		Present Study
Coccosteus	cuspidatus	Placodermi	Arthrodira	Coccosteidae	fusiform	TRUE	29.62		6.24							NMS 1893.107.27		Present Study
Coccosteus	cuspidatus	Placodermi	Arthrodira	Coccosteidae	fusiform	TRUE	32.27		6.47							NMS 1897.55.6		Present Study
Coccosteus	cuspidatus	Placodermi	Arthrodira	Coccosteidae	fusiform	TRUE	37.13	23.14	6.75							FMNH PF 1673		Present Study
Coccosteus	cuspidatus	Placodermi	Arthrodira	Coccosteidae	fusiform	TRUE	37.51	29.42	7.72							ROM VP 52664		Present Study
Compagopiscis	croucheri	Placodermi	Arthrodira	Stem Incisoscutoidea	fusiform	TRUE			6.6		2.26	3.94				WAM 70.4.263		Gardiner and Miles 1994; Trinajstic and Hazelton 2007
Compagopiscis	croucheri	Placodermi	Arthrodira	Stem Incisoscutoidea	fusiform	TRUE			6.48		1.98					P50942		Gardiner and Miles 1994
Dickosteus	threiplandi	Placodermi	Arthrodira	Coccosteidae	fusiform	TRUE	52.32		12.65							NHMUK PV P 49663		Present Study
Dickosteus	threiplandi	Placodermi	Arthrodira	Coccosteidae	fusiform	TRUE	43.7		9.22							NMS 1987.7.118	2 cm added to measurable length as this specimen is missing the distal tip of tail	Present Study
Draconichthys	elegans	Placodermi	Arthrodira	Selenosteidae	fusiform	TRUE			14.227		6.25					SMNK-PAL 6309		Rücklin 2011
Dunkleosteus	terrelli	Placodermi	Arthrodira	Dunkleosteidae	fusiform	TRUE			61.3		42.87	71.63	53.8	120		CMNH 5768		Present Study
Dunkleosteus	terrelli	Placodermi	Arthrodira	Dunkleosteidae	fusiform	TRUE			34		19.2174	29.99	21.28	51		CMNH 7424		Present Study
Dunkleosteus	terrelli	Placodermi	Arthrodira	Dunkleosteidae	fusiform	TRUE			51		32.07	51.4	40.4	91	juvenile	CMNH 6090		Present Study
Dunkleosteus	terrelli	Placodermi	Arthrodira	Dunkleosteidae	fusiform	TRUE			57		34.79	52	40.65	99		CMNH 7054		Present Study
Dunkleosteus	terrelli	Placodermi	Arthrodira	Dunkleosteidae	fusiform	TRUE			28.81		16.179					CMNH 8982		Present Study
Dunkleosteus	terrelli	Placodermi	Arthrodira	Dunkleosteidae	fusiform	TRUE			57.9		39.94					CMNH 8131		Present Study
Eastmanosteus	calliaspis	Placodermi	Arthrodira	Dunkleosteidae	fusiform	TRUE			13.37		6.39					70.4.864		Dennis-Bryan 1987
Gymnotrachelus	hydei	Placodermi	Arthrodira	Selenosteidae	fusiform	TRUE			12.53		5.936					Recon. (Carr 1994)		Carr 1994
Hadrosteus	rapax	Placodermi	Arthrodira	unknown	fusiform	TRUE			16.85		9.46704					Recon. (Gross 1932 fig. 11)		Gross 1932
Harrytoombsia	elegans	Placodermi	Arthrodira	Torosteidae	fusiform	TRUE			6.18		2.11					WAM P50914		Miles and Dennis 1979
Heintzichthys	gouldii	Placodermi	Arthrodira	"Gorgonichthyidae"	fusiform	TRUE			19.17		10.64				adult	NHMUK PV P 9335		Heintz 1931, Present Study
Holonema	westolli	Placodermi	Arthrodira	Holonematidae	fusiform	TRUE	60.635	45.6	9.64		2.43	11.385				Recon. (Miles 1971)		Miles 1971, Trinajstic 1999
Incisoscutum	ritchei	Placodermi	Arthrodira	Stem Incisoscutoidea	fusiform	TRUE	30.2736	20.669	5.741		2.017	3.6				Recon. (Trinjastic 2013)		Trinjastic 2013
Incisoscutum	ritchei	Placodermi	Arthrodira	Stem Incisoscutoidea	fusiform	TRUE			5.76							WAM P50929	Total length estimated assuming similar proportions to other specimens of Incisoscutum and a precaudal/total length ratio similar to Coccosteus	Dennis and Miles 1981
Mcnamaraspis	kaprios	Placodermi	Arthrodira	Stem Incisoscutoidea	fusiform	TRUE			5.63		1.8					WAM 86.9.676		Long 1995
Millerosteus	minor	Placodermi	Arthrodira	Coccosteidae	fusiform	TRUE	13.72		2.34							FMNH PF 1089		Present Study
Millerosteus	minor	Placodermi	Arthrodira	Coccosteidae	fusiform	TRUE	9.97		2.65							FMNH PF 1090		Present Study
Millerosteus	minor	Placodermi	Arthrodira	Coccosteidae	fusiform	TRUE	14.948		2.96		0.727	1.89				Composite Millerosteus	No complete specimen of Millerosteus could be examined in this study. Instead, composite proportions for this species were estimated from LDUCZ-V998 from Desmond 1974 (reported as C.369 by this author) with total length estimated based on a specimen preserving most of the post-thoracic axial skeleton collected by M. J. Newman. Total length was estimated by scaling from the length from the tip of …	Desmond 1974, Newman pers. comm.
Newspecies	Newspecies	Placodermi	Arthrodira	unknown	fusiform	TRUE	63	48	12.366			8.46				CMNH 50233	Preserved extent of body suggests 48 cm precaudal length, specimen is glued up to a lengh of about 63 cm, suggesting the fossil extends this far, but the material hasn't been prepped yet.	Present Study
Pholidosteus	friedeli	Placodermi	Arthrodira	Pholidosteidae	fusiform	TRUE			9.61		2.92427					Recon. (Gross 1932 Pholid.)		Gross 1932
Plourdosteus	canadensis	Placodermi	Arthrodira	Plourdosteidae	fusiform	TRUE	37.51	29.58	8.71		3.249	8.27	7.82			MNHM 2-177		Vézina 1988; 1990
Titanichthys	clarki	Placodermi	Arthrodira	Titanichthyidae	fusiform	TRUE			64.78		19.33					CMNH 50319		Boyle and Ryan 2017
Torosteus	pulchellus	Placodermi	Arthrodira	Torosteidae	fusiform	TRUE			5.9		2.1					Composite pulchellus		Gardiner and Miles 1990
Torosteus	tuberculatus	Placodermi	Arthrodira	Torosteidae	fusiform	TRUE			7.02		2.5					Composite tuberculatus		Gardiner and Miles 1990
Watsonosteus	fletti	Placodermi	Arthrodira	Coccosteidae	fusiform	TRUE	56.62		11.51			12.46				NMS G.1995.4.2		Newman, pers. comm.
Acanthurus	olivaceus	Actinopterygii	Acanthuriformes	Acanthuridae	compressiform	FALSE	17	13.2	3.205	2.7	0.566							Randall 1997
Leiognathus	equula	Actinopterygii	Acanthuriformes	Leiognathidae	compressiform	FALSE	17.4	14.3	4.61	3.44	1.54							Randall 1997
Luvarus	imperialis	Actinopterygii	Acanthuriformes	Luvaridae	fusiform	FALSE	157.827	132.368	31.855	22.653					adult		Weight appears to be approximate. Standard length was reported as 168 cm in Nichols and Helmuth 1940, but based on the published image and the cited proportions of the specimen there is no way this specimen could be 168 cm, even if the fish's body was bent in the image. Additionally, a 168 cm Luvarus would result in a significantly heavier animal than was reported, whereas the photo produces meas…	Nichols and Helmuth 1940
Luvarus	imperialis	Actinopterygii	Acanthuriformes	Luvaridae	fusiform	FALSE	143.39	125.9	30.9	22.82	11.193	8.18			adult			Gregory and Conrad 1943
Luvarus	imperialis	Actinopterygii	Acanthuriformes	Luvaridae	fusiform	FALSE	171	150	31.826	20.734	8.929				adult		Measurements of head scaled from published photo and body height	Gül and Ataç 2020
Naso	unicornis	Actinopterygii	Acanthuriformes	Acanthuridae	compressiform	FALSE	33	28.7	6.768	5.957	1.306							Randall 1997
Naso	unicornis	Actinopterygii	Acanthuriformes	Acanthuridae	compressiform	FALSE	47.5	36	8.396	7.485	1.984							Randall 1997
Naso	unicornis	Actinopterygii	Acanthuriformes	Acanthuridae	compressiform	FALSE	32.41	24.82	6.72	3	1.39					JNC 2734	Downloaded from FishBase at https://www.fishbase.de/photos/PicturesSummary.php?StartRow=6&ID=1265&what=species&TotRec=12	Justine pers. comm.
Pomacanthus	imperator	Actinopterygii	Acanthuriformes	Pomacanthidae	compressiform	FALSE	32	26.8	6.9412	4.76						HUJ 19899		Golani et al. 2010
Pomacanthus	imperator	Actinopterygii	Acanthuriformes	Pomacanthidae	compressiform	FALSE	32.6	27.6	7.7	4.88						GAFR 112		Capapé et al. 2018
Pomacanthus	imperator	Actinopterygii	Acanthuriformes	Pomacanthidae	compressiform	FALSE	25.1	20.8	5.38	3.88	1.474							Randall 1997
Pomacanthus	imperator	Actinopterygii	Acanthuriformes	Pomacanthidae	compressiform	FALSE	25.2	21.2	5.24	3.186	1.61							Randall 1997
Acipenser	oxyrinchus	Actinopterygii	Acipenseriformes	Acipenseridae	fusiform	FALSE	166.5	142	41	20.05		7.672				FSBC 32937		Present Study
Acipenser	ruthenus	Actinopterygii	Acipenseriformes	Acipenseridae	fusiform	FALSE	60		12.282			1.854						Kalmykov et al. 2009
Acipenser	ruthenus	Actinopterygii	Acipenseriformes	Acipenseridae	fusiform	FALSE	60		12.126			1.956						Kalmykov et al. 2009
Acipenser	ruthenus	Actinopterygii	Acipenseriformes	Acipenseridae	fusiform	FALSE	60		12.228			2.148						Kalmykov et al. 2009
Acipenser	sinensis	Actinopterygii	Acipenseriformes	Acipenseridae	fusiform	FALSE	85	72.5	18.5			4.4						Ting 1949
Acipenser	sinensis	Actinopterygii	Acipenseriformes	Acipenseridae	fusiform	FALSE	310	270	71.4619	39.1381	8.91537	20.3969				KAUM-I 99269		Hata et al. 2018
Huso	dauricus	Actinopterygii	Acipenseriformes	Acipenseridae	fusiform	FALSE	176.5	155.4	38.2	27.1		17.1						Honma and Itano 1994
Huso	dauricus	Actinopterygii	Acipenseriformes	Acipenseridae	fusiform	FALSE	130	98.02	33.02			15.0241						Mikodina et al. 2015
Huso	dauricus	Actinopterygii	Acipenseriformes	Acipenseridae	fusiform	FALSE	143	108.537	30.03			11.5015						Mikodina et al. 2015
Huso	dauricus	Actinopterygii	Acipenseriformes	Acipenseridae	fusiform	FALSE	131	98.512	31.964			10.9956						Mikodina et al. 2015
Polyodon	spathula	Actinopterygii	Acipenseriformes	Polyodontidae	fusiform	FALSE	90.603	74.603	24.903	18.38	10.71	10.384				OSUM 77243		Present Study
Polyodon	spathula	Actinopterygii	Acipenseriformes	Polyodontidae	fusiform	FALSE	56.704	46.504	15.004	10.892	7.79	6.185				OSUM 34195		Present Study
Pseudoscaphirhynchus	hermanni	Actinopterygii	Acipenseriformes	Acipenseridae	elongate	FALSE	27.5	23.3	9.6			2.1				Specimen 1		Salnikov et al. 1996
Pseudoscaphirhynchus	hermanni	Actinopterygii	Acipenseriformes	Acipenseridae	elongate	FALSE	23	18.8	7.6			2				Specimen 2		Salnikov et al. 1996
Scaphirhynchus	platorynchus	Actinopterygii	Acipenseriformes	Acipenseridae	elongate	FALSE	62.4303	45.77	12.129			3.47852						Williams and Clemmer 1991
Scaphirhynchus	suttkusi	Actinopterygii	Acipenseriformes	Acipenseridae	elongate	FALSE	64.28	55.2	16.08	10.93						TU 135000		Williams and Clemmer 1991
Scaphirhynchus	suttkusi	Actinopterygii	Acipenseriformes	Acipenseridae	elongate	FALSE	70.221	53.4	14.418			4.1118						Williams and Clemmer 1991
Albula	argentea	Actinopterygii	Albuliformes	Albulidae	fusiform	FALSE	42.7	33.694	8.477	5.724	2.91							Osmany pers. comm. (FishBase)
Albula	glossodonta	Actinopterygii	Albuliformes	Albulidae	fusiform	FALSE	62.7	53	15.35	12.91	4.65							Randall 1997
Albula	glossodonta	Actinopterygii	Albuliformes	Albulidae	fusiform	FALSE	42	32.8	8.49	6.46	2.49							Randall 1997
Albula	glossodonta	Actinopterygii	Albuliformes	Albulidae	fusiform	FALSE	44	35.3	9.24	6.54	3.41							Randall 1997
Albula	vulpes	Actinopterygii	Albuliformes	Albulidae	fusiform	FALSE	59.75	47.5	13.764	7.98	3.19	3.195				FSBC 18801		Present Study
Albula	vulpes	Actinopterygii	Albuliformes	Albulidae	fusiform	FALSE	58	45	14.3	8.17	2.38	5.021				FSBC 19093a		Present Study
Albula	vulpes	Actinopterygii	Albuliformes	Albulidae	fusiform	FALSE	58	45	13.7	9.84	3.25	9.673				FSBC 19093b		Present Study
Albula	vulpes	Actinopterygii	Albuliformes	Albulidae	fusiform	FALSE	62.5	49	15	9.884	3.507	3.765				FSBC 19093c		Present Study
Albula	vulpes	Actinopterygii	Albuliformes	Albulidae	fusiform	FALSE	71	57	17.3			4.274				FSBC 19093d		Present Study
Alepocephalus	bairdii	Actinopterygii	Alepocephaliformes	Alepocephalidae	fusiform	FALSE	69.54	61	14.335	9.15	5.2887					USNM 22468		Goode and Bean 1879c
Narcetes	shonanmaruae	Actinopterygii	Alepocephaliformes	Alepocephalidae	fusiform	FALSE	138	121	29.524	14.07						SH8-69		Fujiwara et al. 2021
Narcetes	shonanmaruae	Actinopterygii	Alepocephaliformes	Alepocephalidae	fusiform	FALSE	122	104	28.496							SH8-43		Fujiwara et al. 2021
Narcetes	shonanmaruae	Actinopterygii	Alepocephaliformes	Alepocephalidae	fusiform	FALSE	125	115	28.405							SH12-1		Fujiwara et al. 2021
Narcetes	shonanmaruae	Actinopterygii	Alepocephaliformes	Alepocephalidae	fusiform	FALSE	132	117.5	28.7875							SH12-14		Fujiwara et al. 2021
Amia	calva	Actinopterygii	Amiiformes	Amiidae	fusiform	FALSE	23	19.1	5.956	4.421	2.846	3.352			juvenile	CMNH 2504		Present Study
Amia	calva	Actinopterygii	Amiiformes	Amiidae	fusiform	FALSE	36.1	30.8	7.425	5.597	3.209	4.113			juvenile	CMNH 2571a		Present Study
Amia	calva	Actinopterygii	Amiiformes	Amiidae	fusiform	FALSE	23.8	19.5	5.78	4.43	2.685	3.244			juvenile	CMNH 2571b		Present Study
Amia	calva	Actinopterygii	Amiiformes	Amiidae	fusiform	FALSE	46.1	38.7	9.049	6.93	4.375	4.972				CMNH 2109		Present Study
Amia	calva	Actinopterygii	Amiiformes	Amiidae	fusiform	FALSE	44	37.8	8.695	6.475	4.215	4.857				CMNH 3278		Present Study
Amia	calva	Actinopterygii	Amiiformes	Amiidae	fusiform	FALSE	53	46	11.228	8.142	3.513	5.2				OSUM 14022a		Present Study
Amia	calva	Actinopterygii	Amiiformes	Amiidae	fusiform	FALSE	43.1	36.4	9.73	7.397	4.028	5.009				OSUM 14023		Present Study
Amia	calva	Actinopterygii	Amiiformes	Amiidae	fusiform	FALSE	50	41.6	11.086	7.867	3.62	5.259				OSUM 14022b	Head depth is approximate	Present Study
Amia	calva	Actinopterygii	Amiiformes	Amiidae	fusiform	FALSE	52	34.5	12.166	8.69	5.38	5.537				OSUM 14022c		Present Study
Amia	calva	Actinopterygii	Amiiformes	Amiidae	fusiform	FALSE	54.2	45	11.421	8.618		4.781				OSUM 103663		Present Study
Amia	calva	Actinopterygii	Amiiformes	Amiidae	fusiform	FALSE	41	34.4	9.568	6.503	4.514	4.489				OSUM bowfin		Present Study
Channa	argus	Actinopterygii	Anabantiformes	Channidae	elongate	FALSE	60.984	51.392	13.036									Mamilov et al. 2017
Channa	argus	Actinopterygii	Anabantiformes	Channidae	elongate	FALSE	40.17	33.92	10.9562									Mamilov et al. 2017
Channa	gachua	Actinopterygii	Anabantiformes	Channidae	elongate	FALSE	12.85	10.52	3.15		1.22							Kumar et al. 2020
Channa	gachua	Actinopterygii	Anabantiformes	Channidae	elongate	FALSE	12.63	10.39	3.12		1.19							Kumar et al. 2020
Channa	gachua	Actinopterygii	Anabantiformes	Channidae	elongate	FALSE	12.31	10.16	3.01		1.15							Kumar et al. 2020
Channa	punctatus	Actinopterygii	Anabantiformes	Channidae	elongate	FALSE	13.7	11.31	3.98							Lucknow		Kashyap et al. 2016
Channa	punctatus	Actinopterygii	Anabantiformes	Channidae	elongate	FALSE	12.82	10.58	3.65							Kolkata		Kashyap et al. 2016
Nandus	nandus	Actinopterygii	Anabantiformes	Nandidae	fusiform	FALSE	12.57	10.29	4.46		1.37					males		Hasan Mredul et al. 2021
Nandus	nandus	Actinopterygii	Anabantiformes	Nandidae	fusiform	FALSE	13.23	10.85	4.61		1.47					females		Hasan Mredul et al. 2021
Nandus	prolixus	Actinopterygii	Anabantiformes	Nandidae	fusiform	FALSE	10.152	8.34	3.32766	2.084	1.588					FMNH 44907		Chakrabarty et al. 2006
Parachanna	obscura	Actinopterygii	Anabantiformes	Channidae	elongate	FALSE	28.34	24.94	7.07									Vodunnou et al. 2017
Parachanna	obscura	Actinopterygii	Anabantiformes	Channidae	elongate	FALSE	26.99	23.26	6.73									Vodunnou et al. 2017
Anguilla	rostrata	Actinopterygii	Anguilliformes	Anguillidae	anguilliform	FALSE	69		8.67	4.697		1.692				OSUM indiana eel		Present Study
Conger	japonicus	Actinopterygii	Anguilliformes	Congridae	anguilliform	FALSE	150.5	148.3	21.8		6.1							Yagi et al. 2013
Conger	macrocephalus	Actinopterygii	Anguilliformes	Congridae	anguilliform	FALSE	88		17.5		5.7							Ali et al. 2021
Conger	macrocephalus	Actinopterygii	Anguilliformes	Congridae	anguilliform	FALSE	92		16		5.5							Ali et al. 2021
Conger	oceanicus	Actinopterygii	Anguilliformes	Congridae	anguilliform	FALSE	194.5		28			7.897				FSBC 18272		Present Study
Conger	sp.	Actinopterygii	Anguilliformes	Congridae	anguilliform	FALSE	82.5		15.7			4.66				FSBC 7595		Present Study
Enchelycore	anatina	Actinopterygii	Anguilliformes	Muraenidae	anguilliform	FALSE	51	51	6.0996	3.4017								Ragheb and Rizkalla et al. 2020
Gymnothorax	australicola	Actinopterygii	Anguilliformes	Muraenidae	anguilliform	FALSE	12.5		1.475		0.4375							Lavenberg 1992
Gymnothorax	australicola	Actinopterygii	Anguilliformes	Muraenidae	anguilliform	FALSE	12.8		1.3952		0.384							Lavenberg 1992
Gymnothorax	australicola	Actinopterygii	Anguilliformes	Muraenidae	anguilliform	FALSE	16.1		1.932		0.4991							Lavenberg 1992
Gymnothorax	australicola	Actinopterygii	Anguilliformes	Muraenidae	anguilliform	FALSE	18.4		2.2264		0.736							Lavenberg 1992
Gymnothorax	australicola	Actinopterygii	Anguilliformes	Muraenidae	anguilliform	FALSE	20.3		2.5172		0.9135							Lavenberg 1992
Gymnothorax	australicola	Actinopterygii	Anguilliformes	Muraenidae	anguilliform	FALSE	20.8		2.4752		0.7696							Lavenberg 1992
Gymnothorax	australicola	Actinopterygii	Anguilliformes	Muraenidae	anguilliform	FALSE	22		3.08		0.968							Lavenberg 1992
Gymnothorax	australicola	Actinopterygii	Anguilliformes	Muraenidae	anguilliform	FALSE	24.5		2.94		1.1025							Lavenberg 1992
Gymnothorax	australicola	Actinopterygii	Anguilliformes	Muraenidae	anguilliform	FALSE	24.9		2.8884		0.8466							Lavenberg 1992
Gymnothorax	australicola	Actinopterygii	Anguilliformes	Muraenidae	anguilliform	FALSE	25		2.6		0.85							Lavenberg 1992
Gymnothorax	australicola	Actinopterygii	Anguilliformes	Muraenidae	anguilliform	FALSE	26.1		2.9232		0.8874							Lavenberg 1992
Gymnothorax	australicola	Actinopterygii	Anguilliformes	Muraenidae	anguilliform	FALSE	26.7		3.4443		1.1214							Lavenberg 1992
Gymnothorax	australicola	Actinopterygii	Anguilliformes	Muraenidae	anguilliform	FALSE	28		3.22		1.232							Lavenberg 1992
Gymnothorax	australicola	Actinopterygii	Anguilliformes	Muraenidae	anguilliform	FALSE	28.1		3.372		0.9835							Lavenberg 1992
Gymnothorax	australicola	Actinopterygii	Anguilliformes	Muraenidae	anguilliform	FALSE	28.5		3.306		1.0545							Lavenberg 1992
Gymnothorax	australicola	Actinopterygii	Anguilliformes	Muraenidae	anguilliform	FALSE	30		3.33		1.35							Lavenberg 1992
Gymnothorax	australicola	Actinopterygii	Anguilliformes	Muraenidae	anguilliform	FALSE	30.1		3.4615		1.1739							Lavenberg 1992
Gymnothorax	australicola	Actinopterygii	Anguilliformes	Muraenidae	anguilliform	FALSE	31.5		3.654		1.26							Lavenberg 1992
Gymnothorax	australicola	Actinopterygii	Anguilliformes	Muraenidae	anguilliform	FALSE	32		3.616		1.216							Lavenberg 1992
Gymnothorax	australicola	Actinopterygii	Anguilliformes	Muraenidae	anguilliform	FALSE	34.6		4.2558		1.6608							Lavenberg 1992
Gymnothorax	minor	Actinopterygii	Anguilliformes	Muraenidae	anguilliform	FALSE	48.582		7.516	3.125	2.391							Li et al. 2018
Gymnothorax	moringa	Actinopterygii	Anguilliformes	Muraenidae	anguilliform	FALSE	89		14.407			2.472				FSBC 7168		Present Study
Gymnothorax	reticularis	Actinopterygii	Anguilliformes	Muraenidae	anguilliform	FALSE	46		6.04	2.243	2.02					TAU P. 14971		Stern and Goren 2013
Gymnothorax	ypsilon	Actinopterygii	Anguilliformes	Muraenidae	anguilliform	FALSE	72.4		9.3396							URM-P 1783		Hatooka and Randall 1992
Gymnothorax	ypsilon	Actinopterygii	Anguilliformes	Muraenidae	anguilliform	FALSE	48.6		6.0264							FAKU 51430		Hatooka and Randall 1992
Gymnothorax	ypsilon	Actinopterygii	Anguilliformes	Muraenidae	anguilliform	FALSE	62.4		7.8							FAKU 51064		Hatooka and Randall 1992
Gymnothorax	ypsilon	Actinopterygii	Anguilliformes	Muraenidae	anguilliform	FALSE	64.4		7.7924							FAKU 100530		Hatooka and Randall 1992
Gymnothorax	ypsilon	Actinopterygii	Anguilliformes	Muraenidae	anguilliform	FALSE	57.1		6.9091							SMBL-F 73341		Hatooka and Randall 1992
Gymnothorax	ypsilon	Actinopterygii	Anguilliformes	Muraenidae	anguilliform	FALSE	67.5		9.2475							ZUMT 55591		Hatooka and Randall 1992
Gymnothorax	ypsilon	Actinopterygii	Anguilliformes	Muraenidae	anguilliform	FALSE	62.4		8.2368							ZUMT 55594		Hatooka and Randall 1992
Gymnothorax	ypsilon	Actinopterygii	Anguilliformes	Muraenidae	anguilliform	FALSE	77.2		10.036							BPBM 9643-1		Hatooka and Randall 1992
Gymnothorax	ypsilon	Actinopterygii	Anguilliformes	Muraenidae	anguilliform	FALSE	77.6		9.3896							BPBM 9643-3		Hatooka and Randall 1992
Gymnothorax	ypsilon	Actinopterygii	Anguilliformes	Muraenidae	anguilliform	FALSE	89		10.769							BPBM 9643-4		Hatooka and Randall 1992
Muraenesox	cinereus	Actinopterygii	Anguilliformes	Muraenesocidae	anguilliform	FALSE	104.5		19.1									Ali et al. 2021
Muraenesox	cinereus	Actinopterygii	Anguilliformes	Muraenesocidae	anguilliform	FALSE	130		23.6									Ali et al. 2021
Nettastoma	melanurum	Actinopterygii	Anguilliformes	Nettastomidae	anguilliform	FALSE	57	57	8.5									Rafrafi-Nouira et al. 2018
Nettastoma	melanurum	Actinopterygii	Anguilliformes	Nettastomidae	anguilliform	FALSE	58.5	58.5	7.8									Rafrafi-Nouira et al. 2018
Nettastoma	melanurum	Actinopterygii	Anguilliformes	Nettastomidae	anguilliform	FALSE	62.3	62.3	8.1									Rafrafi-Nouira et al. 2018
Rhyncoconger	flavus	Actinopterygii	Anguilliformes	Congridae	anguilliform	FALSE	170		29.5	17.6	5.63	7.05				FSBC 32081		Present Study
Strophiodon	sathete	Actinopterygii	Anguilliformes	Muraenidae	anguilliform	FALSE	110.4	45.5786	9.82008		3.55683							Loh et al. 2015
Atherina	boyeri	Actinopterygii	Atheriniformes	Atherinidae	fusiform	FALSE	7.936	6.953	1.533								females	Benzer 2019
Atherina	boyeri	Actinopterygii	Atheriniformes	Atherinidae	fusiform	FALSE	7.92	6.86	1.455								males	Benzer 2019
Atherina	boyeri	Actinopterygii	Atheriniformes	Atherinidae	fusiform	FALSE	6.722	5.817	1.211								females	Benzer 2018
Atherina	boyeri	Actinopterygii	Atheriniformes	Atherinidae	fusiform	FALSE	6.554	5.614	1.175								males	Benzer 2018
Atherinomorus	aetholepis	Actinopterygii	Atheriniformes	Atheriniidae	fusiform	FALSE	7.244	6.2	1.468	1.061	0.752					MNHN 2001-1247	Holotype	Kimura et al. 2002
Atherinomorus	duodecimalis	Actinopterygii	Atheriniformes	Atheriniidae	fusiform	FALSE	4.734	4.035	1.132	0.801	0.5							Mazlan et al. 2012
Atherinomorus	duodecimalis	Actinopterygii	Atheriniformes	Atheriniidae	fusiform	FALSE	7.722	6.6	1.782		0.39204						Total length estimated assuming the same relationship between total length and standard length as the figured specimen in study	Mazlan et al. 2012
Atherinomorus	duodecimalis	Actinopterygii	Atheriniformes	Atheriniidae	fusiform	FALSE	7.7922	6.66	1.85814		0.444095						Total length estimated assuming the same relationship between total length and standard length as the figured specimen in study	Mazlan et al. 2012
Atherinomorus	duodecimalis	Actinopterygii	Atheriniformes	Atheriniidae	fusiform	FALSE	5.0661	4.33	1.22972		0.327106						Total length estimated assuming the same relationship between total length and standard length as the figured specimen in study	Mazlan et al. 2012
Atherinomorus	insularum	Actinopterygii	Atheriniformes	Atheriniidae	fusiform	FALSE	7.6	6.2	1.398	1	0.717							Randall 1997
Atherinomorus	lacunosus	Actinopterygii	Atheriniformes	Atherinidae	fusiform	FALSE	15.098	12.78	2.598	1.712						KPM-NI 23005		Motomura and Harazaki
Atherinomorus	lacunosus	Actinopterygii	Atheriniformes	Atherinidae	fusiform	FALSE	8.383	6.8	1.696	1.221	0.779							Randall 1997
Atherinomorus	lacunosus	Actinopterygii	Atheriniformes	Atherinidae	fusiform	FALSE	8.074	6.7	1.708	1.129	0.739							Randall 1997
Labidesthes	sicculus	Actinopterygii	Atheriniformes	Atherinopsidae	elongate	FALSE	7.517	6.549	1.389	1.023	0.534	0.306				CMNH 7285a		Present Study
Labidesthes	sicculus	Actinopterygii	Atheriniformes	Atherinopsidae	elongate	FALSE	6.877	5.863	1.24	0.855	0.552	0.286				CMNH 7285b		Present Study
Labidesthes	sicculus	Actinopterygii	Atheriniformes	Atherinopsidae	elongate	FALSE	7.505	6.395	1.358	1.023	0.579	0.274				CMNH 7285c		Present Study
Labidesthes	sicculus	Actinopterygii	Atheriniformes	Atherinopsidae	elongate	FALSE	6.776	5.655	1.217	0.882	0.526	0.193				CMNH 7285d		Present Study
Labidesthes	sicculus	Actinopterygii	Atheriniformes	Atherinopsidae	elongate	FALSE	6.662	5.769	1.188	0.924	0.455	0.25				CMNH 7285e		Present Study
Labidesthes	sicculus	Actinopterygii	Atheriniformes	Atherinopsidae	elongate	FALSE	7.219	6.048	1.295	0.97	0.534	0.304				CMNH 7285f		Present Study
Membras	vagrans	Actinopterygii	Atheriniformes	Atherinopsidae	fusiform	FALSE	11.7	10	2.1		0.55					USNM 22864a		Goode and Bean 1879a
Membras	vagrans	Actinopterygii	Atheriniformes	Atherinopsidae	fusiform	FALSE	10.1	8.5	1.785							USNM 22864b		Goode and Bean 1879a
Menidia	peninsulae	Actinopterygii	Atheriniformes	Atherinopsidae	fusiform	FALSE	9.1	7.6	1.824		0.8056					USNM 21481a		Goode and Bean 1879a
Alepisaurus	ferox	Actinopterygii	Aulopiformes	Alepisauridae	elongate	FALSE	146.934	129.8	20.8	15.2	15					USNM 22705	Tail fin damaged, total length calculated from standard length using FishBase	Bean 1883
Alepisaurus	ferox	Actinopterygii	Aulopiformes	Alepisauridae	elongate	FALSE	121.92		20.32								Holotype of A. serra	Gill 1862
Alepisaurus	ferox	Actinopterygii	Aulopiformes	Alepisauridae	elongate	FALSE	125	106.5	17.954	12.141	12.616	3.507				FSBC 18926		Present Study
Odontostomops	normalops	Actinopterygii	Aulopiformes	Evermannellidae	fusiform	FALSE	16.3	14.8	3.01	2.02	2.1							Arronte et al. 2012
Saurida	flamma	Actinopterygii	Aulopiformes	Synodontidae	elongate	FALSE	13	10.9	2.3	1.41	1.78							Randall 1997, Mihalitsis and Bellwood 2019
Saurida	flamma	Actinopterygii	Aulopiformes	Synodontidae	elongate	FALSE	16.1	13.7	3.46	2.15	2.72							Randall 1997, Mihalitsis and Bellwood 2019
Saurida	flamma	Actinopterygii	Aulopiformes	Synodontidae	elongate	FALSE	31	26.3	6.04	3.67	4.58							Randall 1997, Mihalitsis and Bellwood 2019
Saurida	gracilis	Actinopterygii	Aulopiformes	Synodontidae	elongate	FALSE	12.25	9.9	2.414	1.662	1.818							Randall 1997, Mihalitsis and Bellwood 2019
Saurida	gracilis	Actinopterygii	Aulopiformes	Synodontidae	elongate	FALSE	13.2	11.3	2.475	1.516	2.158							Randall 1997, Mihalitsis and Bellwood 2019
Saurida	gracilis	Actinopterygii	Aulopiformes	Synodontidae	elongate	FALSE	16.8	14.6	3.544	2.121	2.854							Randall 1997, Mihalitsis and Bellwood 2019
Saurida	gracilis	Actinopterygii	Aulopiformes	Synodontidae	elongate	FALSE	16.9	14.7	3.364	2.29	2.872							Randall 1997, Mihalitsis and Bellwood 2019
Saurida	lessepsianus	Actinopterygii	Aulopiformes	Synodontidae	elongate	FALSE	21.2	18.6	3.65	2.5	2.71					HUJ 20397		Russell et al. 2015
Saurida	lessepsianus	Actinopterygii	Aulopiformes	Synodontidae	elongate	FALSE	20.93	18.2	3.89	2.73	2.83					Lost specimen		Russell et al. 2015
Saurida	longimanus	Actinopterygii	Aulopiformes	Synodontidae	elongate	FALSE	16.69	14.2	3.71	2.66	2.73					KAU 23		Bogorodsky et al. 2014
Saurida	nebulosa	Actinopterygii	Aulopiformes	Synodontidae	elongate	FALSE	17.7	15.3	3.36	1.94	2.42							Randall 1997, Mihalitsis and Bellwood 2019
Saurida	undosquamis	Actinopterygii	Aulopiformes	Synodontidae	elongate	FALSE	18.529	15.986	3.857			2.686					Proportions estimated for 25 cm adult using equations in study. Mean values for sample reported but mean length (18.5 cm) is much lower than most of the range of the data, suggesting a large number of juveniles may have been collected	Chhandaprajnadarsini et al. 2018
Sudis	hyalina	Actinopterygii	Aulopiformes	Paralepididae	anguilliform	FALSE	35	31.2	9.4		5.7					Individual 1		Mytilineou et al. 2013
Sudis	hyalina	Actinopterygii	Aulopiformes	Paralepididae	anguilliform	FALSE	36.5	32.8	10		6.1					Individual 2		Mytilineou et al. 2013
Sudis	hyalina	Actinopterygii	Aulopiformes	Paralepididae	anguilliform	FALSE	36.7	33	10.1		6.3					Individual 3		Mytilineou et al. 2013
Sudis	hyalina	Actinopterygii	Aulopiformes	Paralepididae	anguilliform	FALSE	37.2	33.5	10.3		6					Individual 4		Mytilineou et al. 2013
Trachinocephalus	trachinus	Actinopterygii	Aulopiformes	Synodontidae	elongate	FALSE	10.4	8.6	2.12	1.27	1.57							Randall 1997, Mihalitsis and Bellwood 2019
Trachinocephalus	trachinus	Actinopterygii	Aulopiformes	Synodontidae	elongate	FALSE	14.2	11.2	2.78	1.86	2.07							Randall 1997, Mihalitsis and Bellwood 2019
Trachinocephalus	trachinus	Actinopterygii	Aulopiformes	Synodontidae	elongate	FALSE	15.3	12.9	2.93	1.75	2.3							Randall 1997, Mihalitsis and Bellwood 2019
Trachinocephalus	trachinus	Actinopterygii	Aulopiformes	Synodontidae	elongate	FALSE	15.3	12.9	3.73	2.6	1.91							Randall 1997, Mihalitsis and Bellwood 2019
Trachinocephalus	trachinus	Actinopterygii	Aulopiformes	Synodontidae	elongate	FALSE	18.2	15.2	3.66	2.05	2.14							Randall 1997, Mihalitsis and Bellwood 2019
Ablennes	hians	Actinopterygii	Beloniformes	Belonidae	elongate	FALSE	83.5	77.0684	20.128									Roul et al. 2019
Ablennes	hians	Actinopterygii	Beloniformes	Belonidae	elongate	FALSE	55.21	50.5	12.545	10.576	8.605							Roul et al. 2018a
Ablennes	hians	Actinopterygii	Beloniformes	Belonidae	elongate	FALSE	50	44.5	14.5		9.6							Alshawy et al. 2019a
Ablennes	hians	Actinopterygii	Beloniformes	Belonidae	elongate	FALSE	55.3	50.2	15	11.3	10.4							Alshawy et al. 2019a
Ablennes	hians	Actinopterygii	Beloniformes	Belonidae	elongate	FALSE	58.858	53.522	17.289	15.023	12.268							Deidun et al. 2021
Belone	belone	Actinopterygii	Beloniformes	Belonidae	elongate	FALSE	103.5	94	22.6									Dulcic and Soldo 2006
Belone	belone	Actinopterygii	Beloniformes	Belonidae	elongate	FALSE	93.3	84.8	24.3	20.42								Acarli et al. 2018
Cheilopogon	furcatus	Actinopterygii	Beloniformes	Exocoetidae	fusiform	FALSE	25.69	19.96	3.87									Ben Souissi et al. 2005
Cheilopogon	furcatus	Actinopterygii	Beloniformes	Exocoetidae	fusiform	FALSE	22.1	17.2	3.55	2.74								Ben Souissi et al. 2005
Cololabis	saira	Actinopterygii	Beloniformes	Scomberesocidae	elongate	FALSE	31.9	28.82	5.57	3.93	1.23						Precaudal length measured to base of caudal fin	Osmany pers. comm. (FishBase)
Cololabis	saira	Actinopterygii	Beloniformes	Scomberesocidae	elongate	FALSE	32.72	29.43	5.81	3.77	1.29						Precaudal length measured to base of caudal fin	Osmany pers. comm. (FishBase)
Hemirhamphus	far	Actinopterygii	Beloniformes	Hemirhamphidae	elongate	FALSE	30.367	25.367	5.737	3.707						FSB-Him-far-01		Rafrafi-Nouira et al. 2012a
Hemirhamphus	far	Actinopterygii	Beloniformes	Hemirhamphidae	elongate	FALSE	23.68	19.6	4.47	3.11	1.3							Randall 1997
Hemirhamphus	far	Actinopterygii	Beloniformes	Hemirhamphidae	elongate	FALSE	23.02	18.8	4.5	3.24	1.56							Randall 1997
Hemirhamphus	far	Actinopterygii	Beloniformes	Hemirhamphidae	elongate	FALSE	36.8	26.1	6.1	4.09	2.01							Randall 1997
Hemirhamphus	far	Actinopterygii	Beloniformes	Hemirhamphidae	elongate	FALSE	16.7	13.8	2.97	2.02	0.92							Randall 1997
Hirundichthys	oxycephalus	Actinopterygii	Beloniformes	Exocoetidae	fusiform	FALSE	9.94	8.24	1.84	1.27								Kharin and Saviliev 2011
Oryzias	dopingdopingensis	Actinopterygii	Beloniformes	Adrianichthyidae	fusiform	FALSE	4.268	3.27	0.877	0.5489								Mandagi et al. 2018
Oryzias	dopingdopingensis	Actinopterygii	Beloniformes	Adrianichthyidae	fusiform	FALSE	3.983	3.3	0.885	0.553								Mandagi et al. 2018
Parexocetus	brachypterus	Actinopterygii	Beloniformes	Exocoetidae	fusiform	FALSE	16	13.2	2.827	1.812								Randall 1997
Parexocetus	mento	Actinopterygii	Beloniformes	Exocoetidae	fusiform	FALSE	13.7	11	2.54	1.283								Falautano et al. 2020
Prognichthys	sealei	Actinopterygii	Beloniformes	Exocoetidae	fusiform	FALSE	10.76	8.995	2.255		0.55							Kharin et al. 2007
Strongylura	leiura	Actinopterygii	Beloniformes	Belonidae	elongate	FALSE	50.467	46.5	14.58	12.359	9.4							Roul et al. 2018a
Strongylura	strongylura	Actinopterygii	Beloniformes	Belonidae	elongate	FALSE	25.42	23.4	8.292	7.239	5.619							Roul et al. 2018a
Tylosurus	crocodilus	Actinopterygii	Beloniformes	Belonidae	elongate	FALSE	49.825	45.5	13.772	12.092	8.777							Roul et al. 2018a
Tylosurus	crocodilus	Actinopterygii	Beloniformes	Belonidae	elongate	FALSE	107.5	98	29.3	25.01	17.83	4.331				FSBC 7656		Present Study
Tylosurus	crocodilus	Actinopterygii	Beloniformes	Belonidae	elongate	FALSE	65	59.8	15.66	13.31	9.87							Randall 1997
Tylosurus	crocodilus	Actinopterygii	Beloniformes	Belonidae	elongate	FALSE	35.2	31.7	8.87	7.81	6.06							Randall 1997
Tylosurus	imperialis	Actinopterygii	Beloniformes	Belonidae	elongate	FALSE	85.6	80.2	23.4							Specimen 1		Michailidis 2020
Tylosurus	imperialis	Actinopterygii	Beloniformes	Belonidae	elongate	FALSE	88.4	82.1	24.7							Specimen 2		Michailidis 2020
Tylosurus	imperialis	Actinopterygii	Beloniformes	Belonidae	elongate	FALSE	92.5	86.1	25.4	21.573	18.548					Specimen 3		Michailidis 2020
Beryx	decadactylus	Actinopterygii	Beryciformes	Berycidae	compressiform	FALSE	56	42	14	10.5696	7.4782	3.779				FSBC 18172		Present Study
Beryx	decadactylus	Actinopterygii	Beryciformes	Berycidae	compressiform	FALSE	54.9	48.1	14.34	9.01	8.12							Randall 1997
Beryx	decadactylus	Actinopterygii	Beryciformes	Berycidae	compressiform	FALSE	51.1	38.5	13.5135									Scott 1981
Centroberyx	affinis	Actinopterygii	Beryciformes	Berycidae	compressiform	FALSE	31.3	23.1	8.4084						adult			Scott 1981
Diretmichthys	parini	Actinopterygii	Beryciformes	Diretmidae	compressiform	FALSE	35.6	29.2	9.68		5.83							Lynghammar et al. 2020
Diretmichthys	parini	Actinopterygii	Beryciformes	Diretmidae	compressiform	FALSE	37.9	31.1	10.32									Lynghammar et al. 2020
Cirripectes	stigmaticus	Actinopterygii	Blenniiformes	Bleniidae	fusiform	FALSE	6.5	5.4	1.35	0.87	0.48							Randall 1997
Cirripectes	stigmaticus	Actinopterygii	Blenniiformes	Bleniidae	fusiform	FALSE	10.9	8.7	1.99	1.21	0.82							Randall 1997
Cirripectes	stigmaticus	Actinopterygii	Blenniiformes	Bleniidae	fusiform	FALSE	6.1	4.8	1.21	0.8	0.49							Randall 1997
Salarias	fasciatus	Actinopterygii	Blenniiformes	Bleniidae	fusiform	FALSE	7.6	6	1.21	0.75	0.44							Randall 1997
Salarias	fasciatus	Actinopterygii	Blenniiformes	Bleniidae	fusiform	FALSE	5.7	4.5	1.004	0.708	0.372							Randall 1997
Salarias	fasciatus	Actinopterygii	Blenniiformes	Bleniidae	fusiform	FALSE	9.2	7.4	1.35	0.887	0.549							Randall 1997
Salarias	fasciatus	Actinopterygii	Blenniiformes	Bleniidae	fusiform	FALSE	9.1	7.2	1.491	0.975	0.558							Randall 1997
Salarias	fasciatus	Actinopterygii	Blenniiformes	Bleniidae	fusiform	FALSE	5	4	0.912	0.688	0.343							Randall 1997
Salarias	fasciatus	Actinopterygii	Blenniiformes	Bleniidae	fusiform	FALSE	5.1	4.1	0.761	0.458	0.228							Randall 1997
Salarias	fasciatus	Actinopterygii	Blenniiformes	Bleniidae	fusiform	FALSE	7.1	5.7	1	0.741	0.349							Randall 1997
Salarias	fasciatus	Actinopterygii	Blenniiformes	Bleniidae	fusiform	FALSE	7.7	6.2	1.363	0.85	0.386							Randall 1997
Salarias	fasciatus	Actinopterygii	Blenniiformes	Bleniidae	fusiform	FALSE	13.538	11	1.806	1.11	0.65							Randall 1997
Synchiropus	sechellensis	Actinopterygii	Callionymiformes	Callionymidae	fusiform	FALSE	13.12	10.23	2.9									Michailidis and Chartosia 2016
Centropomus	parallelus	Actinopterygii	Carangaria incertae sedis	Centropomidae	fusiform	FALSE	55.5	43.3	14.48	10.34	5.9	9.647				FSBC 36446		Present Study
Centropomus	undecimalis	Actinopterygii	Carangaria incertae sedis	Centropomidae	fusiform	FALSE	14.149	11.369	3.495	2.473	1.031				juvenile			Pinho et al. 2021
Centropomus	undecimalis	Actinopterygii	Carangaria incertae sedis	Centropomidae	fusiform	FALSE	82.1	65.7	21.7	15.18	8.43	5.449				FSBC 18806		Present Study
Centropomus	undecimalis	Actinopterygii	Carangaria incertae sedis	Centropomidae	fusiform	FALSE	87	68.3	23.5	15.29	8.76	8.967				FSBC 19731		Present Study
Centropomus	undecimalis	Actinopterygii	Carangaria incertae sedis	Centropomidae	fusiform	FALSE	93	78	24	18.15	10.03	5.636				FSBC 19058		Present Study
Centropomus	undecimalis	Actinopterygii	Carangaria incertae sedis	Centropomidae	fusiform	FALSE	60	46.5	16.2	11.28	6.07	4.185				FSBC 18806a		Present Study
Centropomus	undecimalis	Actinopterygii	Carangaria incertae sedis	Centropomidae	fusiform	FALSE	62	47.7	16	11.62	6.4	4.406				FSBC 18806b	head length measured minus opercular flap	Present Study
Eleutheronema	rhadinum	Actinopterygii	Carangaria incertae sedis	Polynemidae	fusiform	FALSE	97.34	73.9	19.214	13.35	9.65					MUFS 18880		Motomura et al. 2001
Eleutheronema	rhadinum	Actinopterygii	Carangaria incertae sedis	Polynemidae	fusiform	FALSE	54.6	42.04	11.2247	6.08	4.79					KAUM-I 956		Motomura et al. 2007
Lates	calcarifer	Actinopterygii	Carangaria incertae sedis	Latidae	fusiform	FALSE	53.3	43.5	13.985	9.666	6.144							Randall 1997
Lates	japonicus	Actinopterygii	Carangaria incertae sedis	Latidae	fusiform	FALSE	92.246	72.4	25.099	17.26	8.879					OMNH-P 46865		Kimura et al. 2021
Psammoperca	vaigiensis	Actinopterygii	Carangaria incertae sedis	Latidae	fusiform	FALSE	23.6	18.7	6.4007	4.205	2.341							Randall 1997, Mihalitsis and Bellwood 2019
Sphyraena	acutipinnis	Actinopterygii	Carangaria incertae sedis	Sphyraenidae	elongate	FALSE	34.022		8.408		3.45							Williams 1959
Sphyraena	afra	Actinopterygii	Carangaria incertae sedis	Sphyraenidae	elongate	FALSE	39.74	32.68	10.18									Ayo-Olalusi and Ayoade 2017
Sphyraena	africana	Actinopterygii	Carangaria incertae sedis	Sphyraenidae	elongate	FALSE	35.523	30.5	9.538	7.933	3.623							Williams 1959
Sphyraena	arabiansis	Actinopterygii	Carangaria incertae sedis	Sphyraenidae	elongate	FALSE	104	91	23.205	17.759	9.555							Manzoor et al. 2020
Sphyraena	arabiansis	Actinopterygii	Carangaria incertae sedis	Sphyraenidae	elongate	FALSE	100	85	23.4005	16.63	10.2					CMFRI GB 31.143.2.1		Abdussamad et al. 2015
Sphyraena	arabiansis	Actinopterygii	Carangaria incertae sedis	Sphyraenidae	elongate	FALSE	93.5	81.2	23.4668		10.1338					CMFRI GB 31.143.2.1.1		Abdussamad et al. 2015
Sphyraena	arabiansis	Actinopterygii	Carangaria incertae sedis	Sphyraenidae	elongate	FALSE	100.6	85.7	23.7389		10.1983					CMFRI GB 31.143.2.1.2		Abdussamad et al. 2015
Sphyraena	arabiansis	Actinopterygii	Carangaria incertae sedis	Sphyraenidae	elongate	FALSE	91.6	80	22.8		9.904							Abdussamad et al. 2015
Sphyraena	barracuda	Actinopterygii	Carangaria incertae sedis	Sphyraenidae	elongate	FALSE	144.5	121	41.1		19.6						Holotype of S. akerstromi	Whitley 1947
Sphyraena	barracuda	Actinopterygii	Carangaria incertae sedis	Sphyraenidae	elongate	FALSE	96.5	83.5	23.3		11.5							Whitley 1947
Sphyraena	barracuda	Actinopterygii	Carangaria incertae sedis	Sphyraenidae	elongate	FALSE	48.3	40.6	11.53	9.23	5.5							Randall 1997, Mihalitsis and Bellwood 2019
Sphyraena	barracuda	Actinopterygii	Carangaria incertae sedis	Sphyraenidae	elongate	FALSE	52.3	43.4	12.142		5.818					BPBM 22139		Randall 1997, Mihalitsis and Bellwood 2019
Sphyraena	barracuda	Actinopterygii	Carangaria incertae sedis	Sphyraenidae	elongate	FALSE	108.63	90	27								Total length calculated from reported conversion ratios in study	De Sylva 1963
Sphyraena	barracuda	Actinopterygii	Carangaria incertae sedis	Sphyraenidae	elongate	FALSE	103.923	86.1	24.7107								Total length calculated from reported conversion ratios in study	De Sylva 1963
Sphyraena	barracuda	Actinopterygii	Carangaria incertae sedis	Sphyraenidae	elongate	FALSE	162.341	134.5	40.35								Total length calculated from reported conversion ratios in study	De Sylva 1963
Sphyraena	barracuda	Actinopterygii	Carangaria incertae sedis	Sphyraenidae	elongate	FALSE	134.098	111.1	32.219								Total length calculated from reported conversion ratios in study	De Sylva 1963
Sphyraena	barracuda	Actinopterygii	Carangaria incertae sedis	Sphyraenidae	elongate	FALSE	110.076	97.5	26.008	21.271	13.027							Williams 1959
Sphyraena	chrysotaenia	Actinopterygii	Carangaria incertae sedis	Sphyraenidae	elongate	FALSE	26.9	23.4	7.48	5.702	3.652							Williams 1959
Sphyraena	flavicauda	Actinopterygii	Carangaria incertae sedis	Sphyraenidae	elongate	FALSE	39.5	34.5	10	6.959	3.8							Kara and Bourehail 2020
Sphyraena	flavicauda	Actinopterygii	Carangaria incertae sedis	Sphyraenidae	elongate	FALSE	36.3	30.4	10.059	8.143	5.391							Randall 1997
Sphyraena	flavicauda	Actinopterygii	Carangaria incertae sedis	Sphyraenidae	elongate	FALSE	42	36	10.706	9.017	6.29					BPBM 18282		Randall 1997
Sphyraena	guaguancho	Actinopterygii	Carangaria incertae sedis	Sphyraenidae	elongate	FALSE	54.1	45	13.725	11.925	5.85					USNM 21226	Other specimens not used because they either had damaged caudal rays or were much smaller, and therefore likely juveniles	Goode and Bean 1879a
Sphyraena	idiastes	Actinopterygii	Carangaria incertae sedis	Sphyraenidae	elongate	FALSE	37.94	35.98	10.89							CI-UABC 2726		González-Acosta et al. 2013
Sphyraena	idiastes	Actinopterygii	Carangaria incertae sedis	Sphyraenidae	elongate	FALSE	59.83	54.11	15.48							CI-UABC 2733		González-Acosta et al. 2013
Sphyraena	idiastes	Actinopterygii	Carangaria incertae sedis	Sphyraenidae	elongate	FALSE	48.115	42.33	11.289	8.627	3.728					CI-UABC 2725		González-Acosta et al. 2013
Sphyraena	jello	Actinopterygii	Carangaria incertae sedis	Sphyraenidae	elongate	FALSE	101.643	87	23.682	19.66	10.687							Williams 1959
Sphyraena	obtustata	Actinopterygii	Carangaria incertae sedis	Sphyraenidae	elongate	FALSE	23.83	20.27	6.86									Meshram et al. 2021
Sphyraena	putnamae	Actinopterygii	Carangaria incertae sedis	Sphyraenidae	elongate	FALSE	78.515	67.903	19.682	16.801	8.675					KAUM-I. 114358	Reported standard length 70.1 cm, but this includes some of the post-peduncle region	Morishita et al. 2020
Sphyraena	putnamae	Actinopterygii	Carangaria incertae sedis	Sphyraenidae	elongate	FALSE	53.898	45.8	13.367	11.337	6.244						Holotype of Sphyraena bleekeri	Williams 1959
Sphyraena	putnamae	Actinopterygii	Carangaria incertae sedis	Sphyraenidae	elongate	FALSE	71.92	62	16.3588								Paratype of Sphyraena bleekeri. Total length estimated based on proportions in other specimens	Williams 1959
Sphyraena	putnamae	Actinopterygii	Carangaria incertae sedis	Sphyraenidae	elongate	FALSE	72.152	62.2	18.7349								Paratype of Sphyraena bleekeri. Total length estimated based on proportions in other specimens	Williams 1959
Sphyraena	putnamae	Actinopterygii	Carangaria incertae sedis	Sphyraenidae	elongate	FALSE	41.9	34.2	10.206	8.444	4.596					BPBM 21549		Randall 1997
Sphyraena	putnamae	Actinopterygii	Carangaria incertae sedis	Sphyraenidae	elongate	FALSE	45.6	37.2	10.818	9.188	5.383							Randall 1997
Sphyraena	putnamae	Actinopterygii	Carangaria incertae sedis	Sphyraenidae	elongate	FALSE	50.8	40.8	12.2	9.77	5.74							Randall 1997
Sphyraena	qenie	Actinopterygii	Carangaria incertae sedis	Sphyraenidae	elongate	FALSE	119.2	99.3	27.923	22.96								Béarez 2008
Sphyraena	qenie	Actinopterygii	Carangaria incertae sedis	Sphyraenidae	elongate	FALSE	21.3324	17.4	4.8372	4.628					juvenile			Miki et al. 2019
Sphyraena	qenie	Actinopterygii	Carangaria incertae sedis	Sphyraenidae	elongate	FALSE	67.0259	56.77	16.29	13.72	8.00457					KAUM-I. 111534	Remeasured because reported measurements did not agree with proportions of specimen	Miki et al. 2019
Sphyraena	qenie	Actinopterygii	Carangaria incertae sedis	Sphyraenidae	elongate	FALSE	71.9	71.9	20.3477	16.05						KAUM-I. 131672		Morishita et al. 2020
Sphyraena	qenie	Actinopterygii	Carangaria incertae sedis	Sphyraenidae	elongate	FALSE	92.929	77.333	20.303	17.03	9.356							Williams 1959
Sphyraena	toxeuma	Actinopterygii	Carangaria incertae sedis	Sphyraenidae	elongate	FALSE	73.393	60.5	19.033	16.25	8.31							Williams 1959
Sphyraena	viridensis	Actinopterygii	Carangaria incertae sedis	Sphyraenidae	elongate	FALSE	45.8	40.3	12.2									Akyol 2015
Sphyraena	viridensis	Actinopterygii	Carangaria incertae sedis	Sphyraenidae	elongate	FALSE	47.6	40.8	13									Akyol 2015
Sphyraena	viridensis	Actinopterygii	Carangaria incertae sedis	Sphyraenidae	elongate	FALSE	45.7	40.1	12.2									Akyol 2015
Sphyraena	viridensis	Actinopterygii	Carangaria incertae sedis	Sphyraenidae	elongate	FALSE	45.6	41.7	11.9	9.789								Dulčić and Soldo 2004
Sphyraena	viridensis	Actinopterygii	Carangaria incertae sedis	Sphyraenidae	elongate	FALSE	43.2	36.8	10.9									Dulčić and Soldo 2004
Sphyraena	viridensis	Actinopterygii	Carangaria incertae sedis	Sphyraenidae	elongate	FALSE	51.5	44.7	13.6									Dulčić and Soldo 2004
Sphyraena	viridensis	Actinopterygii	Carangaria incertae sedis	Sphyraenidae	elongate	FALSE	53.2	46.2	14.5	11.568								Dulčić et al. 2009
Sphyraena	viridensis	Actinopterygii	Carangaria incertae sedis	Sphyraenidae	elongate	FALSE	60.7	53.1	15.7									Dulčić et al. 2009
Alectis	alexandrina	Actinopterygii	Carangiformes	Carangidae	compressiform	FALSE	71	53.3	13.294	8.765	5.107				adult			Akyol and Çoker 2019
Alectis	ciliaris	Actinopterygii	Carangiformes	Carangidae	compressiform	FALSE	93.774	78.74	18.432	11.713					adult			Nichols 1920
Alectis	ciliaris	Actinopterygii	Carangiformes	Carangidae	compressiform	FALSE	70.784	57.4	16.4	12.94	7.61	3.716			adult	FSBC 2455	Tail fin damaged. Total preserved length is 66.8 cm. Total length estimated using fork length/total length ratio on FishBase	Present Study
Alectis	ciliaris	Actinopterygii	Carangiformes	Carangidae	compressiform	FALSE	84.7	69	18.4	13.62	7.09	4.065			adult	FSBC 35622		Present Study
Alectis	indicus	Actinopterygii	Carangiformes	Carangidae	compressiform	FALSE	21.8	17.3	5.279	4.122	2.374				juvenile			Randall 1997, Mihalitsis and Bellwood 2019
Alepes	djedaba	Actinopterygii	Carangiformes	Carangidae	fusiform	FALSE	20.3	16.7	4.3								Males	Sajana and Nandan 2017
Alepes	djedaba	Actinopterygii	Carangiformes	Carangidae	fusiform	FALSE	20.7	17	4.3								Females	Sajana and Nandan 2017
Alepes	melanoptera	Actinopterygii	Carangiformes	Carangidae	fusiform	FALSE	14.212	10.936	2.994	1.957	1.599							Ray et al. 2021
Atropus	atropus	Actinopterygii	Carangiformes	Carangidae	compressiform	FALSE	22.47	17.796	4.381	3.165	1.88					FAKU W176		Matsunuma et al. 2019
Atule	mate	Actinopterygii	Carangiformes	Carangidae	fusiform	FALSE	24.4	20.077	5.283	3.772	1.896				adult		Probably one of the three individuals measured by Mihalitsis and Bellwood 2019. Could not match up to the figure in Randall (1997), so remeasured from scratch	Randall 1997
Atule	mate	Actinopterygii	Carangiformes	Carangidae	fusiform	FALSE	20.919	17.084	4.621	2.997	1.723				adult		Probably one of the three individuals measured by Mihalitsis and Bellwood 2019. Could not match up to the figure in Randall (1997), so remeasured from scratch	Randall 1997
Atule	mate	Actinopterygii	Carangiformes	Carangidae	fusiform	FALSE	24.942	20.714	5.784	3.714	1.98				adult		Probably one of the three individuals measured by Mihalitsis and Bellwood 2019. Could not match up to the figure in Randall (1997), so remeasured from scratch	Randall 1997
Atule	mate	Actinopterygii	Carangiformes	Carangidae	fusiform	FALSE	24.66	20.211	5.585	3.658	1.976				adult		Probably one of the three individuals measured by Mihalitsis and Bellwood 2019. Could not match up to the figure in Randall (1997), so remeasured from scratch	Randall 1997
Carangoides	bajad	Actinopterygii	Carangiformes	Carangidae	fusiform	FALSE	23.4	19.6	5.453	4.139	2.091							Randall 1997, Mihalitsis and Bellwood 2019
Carangoides	bajad	Actinopterygii	Carangiformes	Carangidae	fusiform	FALSE	26.4	23.4	7.2511	5.076	2.558							Randall 1997, Mihalitsis and Bellwood 2019
Carangoides	bajad	Actinopterygii	Carangiformes	Carangidae	fusiform	FALSE	41	35.8	9.407	6.83	3.631							Randall 1997, Mihalitsis and Bellwood 2019
Carangoides	chrysophrys	Actinopterygii	Carangiformes	Carangidae	compressiform	FALSE	27.8	22.2	7.38	4.94	3.01						Standard length measured to base of caudal fin	Randall 1997, Mihalitsis and Bellwood 2019
Carangoides	chrysophrys	Actinopterygii	Carangiformes	Carangidae	compressiform	FALSE	28.5	23.86	7.5312	5.27	3.11						Standard length measured to base of caudal fin	Randall 1997, Mihalitsis and Bellwood 2019
Carangoides	coeruleopinnatus	Actinopterygii	Carangiformes	Carangidae	compressiform	FALSE	24.908	20.37	6.372	4.732	2.631							Randall 1997, Mihalitsis and Bellwood 2019
Carangoides	coeruleopinnatus	Actinopterygii	Carangiformes	Carangidae	compressiform	FALSE	30.3	24.15	7.78	6.11	3.37						Standard length measured to base of caudal fin	Randall 1997, Mihalitsis and Bellwood 2019
Carangoides	coeruleopinnatus	Actinopterygii	Carangiformes	Carangidae	compressiform	FALSE	29.193	23.77	7.716	5.641	3.211							Randall 1997, Mihalitsis and Bellwood 2019
Carangoides	coeruleopinnatus	Actinopterygii	Carangiformes	Carangidae	compressiform	FALSE	34.739	27.684	8.293	6.051	3.62				adult			Lin and Shao 1999
Carangoides	coeruleopinnatus	Actinopterygii	Carangiformes	Carangidae	compressiform	FALSE	19.485	16.1	4.931	3.257						FAKU 143305		Matsunuma et al. 2019
Carangoides	dinema	Actinopterygii	Carangiformes	Carangidae	compressiform	FALSE	25.296	20.127	5.816	3.938	2.152					FAKU 143092		Matsunuma et al. 2019
Carangoides	dinema	Actinopterygii	Carangiformes	Carangidae	compressiform	FALSE	33	25.07	6.82	4.71	2.89							Randall 1997
Carangoides	dinema	Actinopterygii	Carangiformes	Carangidae	compressiform	FALSE	35.42	26.75	7.5	5.06	3.05							Lin and Shao 1999
Carangoides	equula	Actinopterygii	Carangiformes	Carangidae	compressiform	FALSE	48.4	39.267	11.773	9.034	4.906							Randall 1997, Mihalitsis and Bellwood 2019
Carangoides	equula	Actinopterygii	Carangiformes	Carangidae	compressiform	FALSE	49.497	41.236	12.809	9.381	5.177							Randall 1997, Mihalitsis and Bellwood 2019
Carangoides	equula	Actinopterygii	Carangiformes	Carangidae	compressiform	FALSE	23.25	18.527	5.805	4.262	2.55							Lin and Shao 1999
Carangoides	equula	Actinopterygii	Carangiformes	Carangidae	compressiform	FALSE	16.625	13.854	4.461	3.241						FAKU 146558		Matsunuma et al. 2019
Carangoides	ferdau	Actinopterygii	Carangiformes	Carangidae	fusiform	FALSE	25.17	18.7	5.56	3.58	2.09							Randall 1997
Carangoides	ferdau	Actinopterygii	Carangiformes	Carangidae	fusiform	FALSE	27.485	21.43	5.552	3.818	2.102							Randall 1997, Mihalitsis and Bellwood 2019
Carangoides	ferdau	Actinopterygii	Carangiformes	Carangidae	fusiform	FALSE	24.9	19.06	5.6	3.82	2.13							Randall 1997
Carangoides	fulvoguttatus	Actinopterygii	Carangiformes	Carangidae	fusiform	FALSE	62.23	48.2	15		6						Reported as "Ferdauia claezooni"	Whitley 1947
Carangoides	fulvoguttatus	Actinopterygii	Carangiformes	Carangidae	fusiform	FALSE	83.82	67.5	19.5		7.4						Reported as "Ferdauia claezooni"	Whitley 1947
Carangoides	fulvoguttatus	Actinopterygii	Carangiformes	Carangidae	fusiform	FALSE	76.2	60	18.5		7						Reported as "Ferdauia claezooni"	Whitley 1947
Carangoides	fulvoguttatus	Actinopterygii	Carangiformes	Carangidae	fusiform	FALSE	55.3	46.06	12.7	9.28	4.74							Randall 1997
Carangoides	fulvoguttatus	Actinopterygii	Carangiformes	Carangidae	fusiform	FALSE	36.204	29.661	9.231	6.399	3.792						Probably one of the three individuals measured by Mihalitsis and Bellwood 2019. Could not match up to the figure in Randall (1997), so remeasured from scratch	Randall 1997
Carangoides	fulvoguttatus	Actinopterygii	Carangiformes	Carangidae	fusiform	FALSE	54.489	46.054	12.559	8.621	5.902						Probably one of the three individuals measured by Mihalitsis and Bellwood 2019. Could not match up to the figure in Randall (1997), so remeasured from scratch	Randall 1997
Carangoides	fulvoguttatus	Actinopterygii	Carangiformes	Carangidae	fusiform	FALSE	36.8	31	9.14	6.68	3.69							Randall 1997, Mihalitsis and Bellwood 2019
Carangoides	fulvoguttatus	Actinopterygii	Carangiformes	Carangidae	fusiform	FALSE	42.54	34.53	10.04	7.33	3.74							Randall 1997, Mihalitsis and Bellwood 2019
Carangoides	fulvoguttatus	Actinopterygii	Carangiformes	Carangidae	fusiform	FALSE	54.3	45.798	12.538	8.892	5.016							Randall 1997, Mihalitsis and Bellwood 2019
Carangoides	orthogrammus	Actinopterygii	Carangiformes	Carangidae	compressiform	FALSE	26.275	21.299	5.752	4.12						FAKU 139350		Matsunuma et al. 2019
Carangoides	talamparoides	Actinopterygii	Carangiformes	Carangidae	compressiform	FALSE	11.315	8.7312	2.5311	1.6939								Ray et al. 2021
Caranx	bartholomaei	Actinopterygii	Carangiformes	Carangidae	fusiform	FALSE	56.5	43	13.6	7.65	3.8	3.578				FSBC 19067		Present Study
Caranx	crysos	Actinopterygii	Carangiformes	Carangidae	fusiform	FALSE	36.8	29.5	8.2						adult			Nerlović et al. 2015
Caranx	crysos	Actinopterygii	Carangiformes	Carangidae	fusiform	FALSE	33.6	26.2	7.5						adult			Nerlović et al. 2015
Caranx	heberi	Actinopterygii	Carangiformes	Carangidae	fusiform	FALSE	40.782	33.09	8.888	6.315	3.954							Randall 1997, Mihalitsis and Bellwood 2019
Caranx	heberi	Actinopterygii	Carangiformes	Carangidae	fusiform	FALSE	68.5	56.48	15.153	10.352	5.816							Randall 1997, Mihalitsis and Bellwood 2019
Caranx	ignobilis	Actinopterygii	Carangiformes	Carangidae	fusiform	FALSE	30.674	23.673	7.246	5.495	3.162						Probably one of the two individuals measured by Mihalitsis and Bellwood 2019. Could not match up to the figure in Randall (1997), so remeasured from scratch	Randall 1997
Caranx	lugubris	Actinopterygii	Carangiformes	Carangidae	fusiform	FALSE	70.3	58.6	17.2	9.7	4.64	4.212				FSBC 3728		Present Study
Caranx	lugubris	Actinopterygii	Carangiformes	Carangidae	fusiform	FALSE	49.168	44	11.981	8.785	5.632					KAUM-I 69396		Hata et al. 2015a
Caranx	melampygus	Actinopterygii	Carangiformes	Carangidae	fusiform	FALSE	53.9	44.879	12.944	9.358	4.958							Randall 1997
Caranx	papuensis	Actinopterygii	Carangiformes	Carangidae	fusiform	FALSE	49.496	38.66	10.351	6.923	4.14				adult			Lin and Shao 1999
Caranx	papuensis	Actinopterygii	Carangiformes	Carangidae	fusiform	FALSE	48.8	38.41	10.96	7.26	4.29							Randall 1997
Caranx	papuensis	Actinopterygii	Carangiformes	Carangidae	fusiform	FALSE	76.2	59	19		8.8							Whitley 1947
Caranx	papuensis	Actinopterygii	Carangiformes	Carangidae	fusiform	FALSE	83.82	66	20.6		9.6							Whitley 1947
Caranx	papuensis	Actinopterygii	Carangiformes	Carangidae	fusiform	FALSE	69.85	54	16.7		8							Whitley 1947
Caranx	papuensis	Actinopterygii	Carangiformes	Carangidae	fusiform	FALSE	81.28	61	20.3		9.6							Whitley 1947
Caranx	sexfasciatus	Actinopterygii	Carangiformes	Carangidae	fusiform	FALSE	40.4	31.87	8.74	6.09	3.91							Randall 1997
Caranx	sexfasciatus	Actinopterygii	Carangiformes	Carangidae	fusiform	FALSE	31.8	24.63	7.54	5.21	3.63							Randall 1997
Caranx	tille	Actinopterygii	Carangiformes	Carangidae	fusiform	FALSE	48.3	39.31	11.1	7.06	4.81							Randall 1997
Coryphaena	equiselis	Actinopterygii	Carangiformes	Coryphaenidae	elongate	FALSE	66.974	48.961	9.647	6.144	3.681						Standard length measured to base of caudal fin. Downloaded from FishBase at https://www.fishbase.de/photos/PicturesSummary.php?StartRow=0&ID=7&what=species&TotRec=4	Freitas pers. comm. (FishBase)
Coryphaena	equiselis	Actinopterygii	Carangiformes	Coryphaenidae	elongate	FALSE	69.5	57.31	12.84	8.629	5.383					DU-FS-140417-17-25		Akash et al. 2020
Coryphaena	equiselis	Actinopterygii	Carangiformes	Coryphaenidae	elongate	FALSE	53.119	40.426	8.011	5.21	3.351						Specimen listed as 54 cm by Osmany, but this appears to be over curves. Measurements taken using scale bar in photo	Osmany pers. comm. (FishBase)
Coryphaena	equiselis	Actinopterygii	Carangiformes	Coryphaenidae	elongate	FALSE	52.832	39.659	7.734	5.109	3.054						Specimen listed as 56 cm by Osmany, but this appears to be over curves. Measurements taken using scale bar in photo	Osmany pers. comm. (FishBase)
Coryphaena	equiselis	Actinopterygii	Carangiformes	Coryphaenidae	elongate	FALSE	39.959	30.67	6.449	4.476	2.571						Specimen listed as 40 cm by Osmany, but this appears to be over curves. Measurements taken using scale bar in photo	Osmany pers. comm. (FishBase)
Coryphaena	equiselis	Actinopterygii	Carangiformes	Coryphaenidae	elongate	FALSE	45.243	33.616	6.669	4.251	2.747						Specimen listed as 46 cm by Osmany, but this appears to be over curves. Measurements taken using scale bar in photo	Osmany pers. comm. (FishBase)
Coryphaena	hippurus	Actinopterygii	Carangiformes	Coryphaenidae	elongate	FALSE	81.5	63.2	15.62		7.65							Artüz and Kubanç 2015
Coryphaena	hippurus	Actinopterygii	Carangiformes	Coryphaenidae	elongate	FALSE	59	44.3	10.6	7.174	4.917	2.827				FSBC 6710		Present Study
Coryphaena	hippurus	Actinopterygii	Carangiformes	Coryphaenidae	elongate	FALSE	152.916	119.89	21.13	15.826	8.087						Standard length measured to base of caudal fin. Downloaded from FishBase at https://www.fishbase.de/photos/PicturesSummary.php?StartRow=5&ID=6&what=species&TotRec=21	Freitas pers. comm. (FishBase)
Coryphaena	hippurus	Actinopterygii	Carangiformes	Coryphaenidae	elongate	FALSE	91.7	75.11	16.08	9.671	6.335					DU-FS-140417-17-32		Akash et al. 2020
Coryphaena	hippurus	Actinopterygii	Carangiformes	Coryphaenidae	elongate	FALSE	76.2	61.4	13.374	7.421	4.776				adult	MSCB 3245		Jawad et al. 2021
Coryphaena	hippurus	Actinopterygii	Carangiformes	Coryphaenidae	elongate	FALSE	93.45	78	15.02	10.9	6.56							Winterbottom, pers. comm. (FishBase)
Coryphaena	hippurus	Actinopterygii	Carangiformes	Coryphaenidae	elongate	FALSE	70.65	60	10.98	7.08	4.44							Winterbottom, pers. comm. (FishBase)
Coryphaena	hippurus	Actinopterygii	Carangiformes	Coryphaenidae	elongate	FALSE	70.628	57.69	10.351	7.003	4.398						Specimen listed as 74 cm by Osmany, but this appears to be over curves. Measurements taken using scale bar in photo	Osmany pers. comm. (FishBase)
Coryphaena	hippurus	Actinopterygii	Carangiformes	Coryphaenidae	elongate	FALSE	63.601	52.267	11.426	7.895	5.335						Specimen listed as 66 cm by Osmany, but this appears to be over curves. Measurements taken using scale bar in photo	Osmany pers. comm. (FishBase)
Decapterus	akaadsi	Actinopterygii	Carangiformes	Carangidae	fusiform	FALSE	25.306	20.967	5.723	4.163						FAKU 145490		Matsunuma et al. 2019
Decapterus	macarellus	Actinopterygii	Carangiformes	Carangidae	fusiform	FALSE	32.664	28.433	6.672	4.739					adult	FAKU 140237		Matsunuma et al. 2019
Decapterus	macrosoma	Actinopterygii	Carangiformes	Carangidae	fusiform	FALSE	29.522	25.613	6.013	4.309					adult	FAKU 142130		Matsunuma et al. 2019
Decapterus	macrosoma	Actinopterygii	Carangiformes	Carangidae	fusiform	FALSE	16.575	14.364	3.737	2.405								Ray et al. 2021
Decapterus	maruadsi	Actinopterygii	Carangiformes	Carangidae	fusiform	FALSE	27.067	23.315	5.261	3.739						FAKU 146559		Matsunuma et al. 2019
Decapterus	muroadsi	Actinopterygii	Carangiformes	Carangidae	fusiform	FALSE	26.848	22.622	5.495	3.875						FAKU 139463		Matsunuma et al. 2019
Decapterus	tabl	Actinopterygii	Carangiformes	Carangidae	fusiform	FALSE	30.201	26.261	7.043	4.911						FAKU 143801		Matsunuma et al. 2019
Echeneis	naucrates	Actinopterygii	Carangiformes	Echeneidae	elongate	FALSE	85	71.5	13.7	9.77	3.6	7.371				FSBC unnumbered		Present Study
Elagatis	bipinnulata	Actinopterygii	Carangiformes	Carangidae	fusiform	FALSE	29.2	22.806	5.494	4.139						FAKU 136510		Matsunuma et al. 2019
Elagatis	bipinnulata	Actinopterygii	Carangiformes	Carangidae	fusiform	FALSE	36.5	27.5	7.1									Saha et al. 2020
Elagatis	bipinnulata	Actinopterygii	Carangiformes	Carangidae	fusiform	FALSE	40	29.5	8.3									Saha et al. 2020
Gnathanodon	speciosus	Actinopterygii	Carangiformes	Carangidae	fusiform	FALSE	44.418	34.232	10.01	6.945	3.77							Lin and Shao 1999
Lichia	amia	Actinopterygii	Carangiformes	Carangidae	fusiform	FALSE	36.76	28.44	7.22	5.22	3.55						Precaudal length measured to base of tail fin. Photo posted to FishBase at https://www.fishbase.de/photos/PicturesSummary.php?StartRow=4&ID=692&what=species&TotRec=7	De Sanctis, pers. comm. (FishBase)
Megalaspis	cordyla	Actinopterygii	Carangiformes	Carangidae	fusiform	FALSE	49	42.5	9.5359	6.516	3.902							Randall 1997, Mihalitsis and Bellwood 2019
Megalaspis	cordyla	Actinopterygii	Carangiformes	Carangidae	fusiform	FALSE	25.728	22.267	5.009									Sajina et al. 2013
Megalaspis	cordyla	Actinopterygii	Carangiformes	Carangidae	fusiform	FALSE	25.066	21.814	5.834									Saker et al. 2004
Megalaspis	cordyla	Actinopterygii	Carangiformes	Carangidae	fusiform	FALSE	53.2	47.1	9.37	6.238	3.442							Randall 1997, Mihalitsis and Bellwood 2019
Megalaspis	cordyla	Actinopterygii	Carangiformes	Carangidae	fusiform	FALSE	27.265	23.351	5.966	3.955	2.477					FAKU 142932		Matsunuma et al. 2019
Naucrates	ductor	Actinopterygii	Carangiformes	Carangidae	fusiform	FALSE	30	24.411	5.976	3.494								Ali-Basha et al. 2021
Naucrates	ductor	Actinopterygii	Carangiformes	Carangidae	fusiform	FALSE	26.287	21.155	6.173	4.127	1.84							Lin and Shao 1999
Naucrates	ductor	Actinopterygii	Carangiformes	Carangidae	fusiform	FALSE	33.865	28.12	7.139	4.737	2.176					FAKU 140137		Matsunuma et al. 2019
Parastromateus	niger	Actinopterygii	Carangiformes	Carangidae	compressiform	FALSE	13.135	10.454	3.147	2.308	1.02					FAKU W779		Matsunuma et al. 2019
Parastromateus	niger	Actinopterygii	Carangiformes	Carangidae	compressiform	FALSE	17.06	14.01	4.09	2.48	1.15				juvenile	KAU 157	Probably juvenile, FishBase lists length-at-maturity as 23 cm	Bogorodsky et al. 2014
Pseudocaranx	dentex	Actinopterygii	Carangiformes	Carangidae	fusiform	FALSE	46.5	36.38	12.54	9.55	4.57							Randall 1997, Mihalitsis and Bellwood 2019
Pseudocaranx	dentex	Actinopterygii	Carangiformes	Carangidae	fusiform	FALSE	49.5	41.47	12.5466	8.453	4.704							Randall 1997, Mihalitsis and Bellwood 2019
Rachycentron	canadum	Actinopterygii	Carangiformes	Rachycentridae	fusiform	FALSE	31.9	26.5	6.706	4.816	2.442							Randall 1997, Mihalitsis and Bellwood 2019
Rachycentron	canadum	Actinopterygii	Carangiformes	Rachycentridae	fusiform	FALSE	61.5	49.6	11.286	7.992	3.885							Randall 1997, Mihalitsis and Bellwood 2019
Rachycentron	canadum	Actinopterygii	Carangiformes	Rachycentridae	fusiform	FALSE	146	108	32.6427	21.8	8.86365							Ueno 1965
Remora	brachyptera	Actinopterygii	Carangiformes	Echeneidae	elongate	FALSE	25.1218	20.9	5.7893							PKU 9440		Myoung et al. 2015
Remora	brachyptera	Actinopterygii	Carangiformes	Echeneidae	elongate	FALSE	21.4798	18.02	4.75728							PKU 11044		Myoung et al. 2015
Remora		Actinopterygii	Carangiformes	Echeneidae	elongate	FALSE	28.8592	24.15	4.95075							PKU 9646		Myoung et al. 2015
Remora	osteochir	Actinopterygii	Carangiformes	Echeneidae	elongate	FALSE	15.4	13.1	2.9344									Tuncer et al. 2012
Remora	remora	Actinopterygii	Carangiformes	Echeneidae	elongate	FALSE	33	26.7	6.8									Ergüden and Ayas 2021
Remora	remora	Actinopterygii	Carangiformes	Echeneidae	elongate	FALSE	66	53.5	13.5									Ergüden and Ayas 2021
Scomberoides	commersonnianus	Actinopterygii	Carangiformes	Carangidae	fusiform	FALSE	74.8097	60.7	11.7454	7.68	6.9714						Prebranchial length, head depth, and other measurements estimated off of the proportions of MUFS 13554, as only one of the two specimens was figured	Motomura et al. 1998
Scomberoides	commersonnianus	Actinopterygii	Carangiformes	Carangidae	fusiform	FALSE	47.46	40.18	8.11636	5.49	4.8216					FAKU 146095		Matsunuma et al. 2019
Scomberoides	commersonnianus	Actinopterygii	Carangiformes	Carangidae	fusiform	FALSE	75.2	61.24	12.409	8.798	7.181							Randall 1997, Mihalitsis and Bellwood 2019
Scomberoides	commersonnianus	Actinopterygii	Carangiformes	Carangidae	fusiform	FALSE	13.3	10.5	2.485	1.864	1.541				juvenile			Randall 1997, Mihalitsis and Bellwood 2019
Scomberoides	commersonnianus	Actinopterygii	Carangiformes	Carangidae	fusiform	FALSE	35.8	30	5.881	4.273	3.593							Randall 1997, Mihalitsis and Bellwood 2019
Scomberoides	commersonnianus	Actinopterygii	Carangiformes	Carangidae	fusiform	FALSE	52.6	43.8	8.856	6.325	5.427							Randall 1997, Mihalitsis and Bellwood 2019
Scomberoides	lysan	Actinopterygii	Carangiformes	Carangidae	fusiform	FALSE	41.92	33.988	5.907	3.703	3.242					JNU0057-1		Kim et al. 2018
Scomberoides	lysan	Actinopterygii	Carangiformes	Carangidae	fusiform	FALSE	55.165	44.85	8.534	5.875	4.197					FAKU 133021		Matsunuma et al. 2019
Scomberoides	tala	Actinopterygii	Carangiformes	Carangidae	fusiform	FALSE	57	46.6	7.47	4.61	4.38							Osmany pers. comm. (FishBase)
Scomberoides	tala	Actinopterygii	Carangiformes	Carangidae	fusiform	FALSE	54	44.08	7.03	4.64	4.05							Osmany pers. comm. (FishBase)
Scomberoides	tol	Actinopterygii	Carangiformes	Carangidae	fusiform	FALSE	32.3	25.76	4.82	3.21	2.23				adult			Randall 1997
Scomberoides	tol	Actinopterygii	Carangiformes	Carangidae	fusiform	FALSE	18.58	15.836	3.207	2.111	1.653				juvenile?	FAKU 142911		Matsunuma et al. 2019
Selar	crumenophthalmus	Actinopterygii	Carangiformes	Carangidae	fusiform	FALSE	22.603	18.917	5.048	3.574	2.54				adult	FAKU 139462		Matsunuma et al. 2019
Selar	crumenophthalmus	Actinopterygii	Carangiformes	Carangidae	fusiform	FALSE	21.442	18	5.475	3.906	2.436				adult		Standard length measured to base of caudal fin	Osmany pers. comm. (FishBase)
Selar	crumenophthalmus	Actinopterygii	Carangiformes	Carangidae	fusiform	FALSE	17.9	14.418	4.43	3.026	2.013				adult		May be on the cusp of maturity. Standard length measured to base of caudal fin	Randall 1997
Selar	crumenophthalmus	Actinopterygii	Carangiformes	Carangidae	fusiform	FALSE	19.7	15.461	5.185	3.849	2.271				adult		May be on the cusp of maturity. Standard length measured to base of caudal fin	Randall 1997
Selene	vomer	Actinopterygii	Carangiformes	Carangidae	compressiform	FALSE	32.03	24.74	8.33	6.2	3.63						Photo uploaded to FishBase at https://www.fishbase.de/photos/UploadedBy.php?autoctr=16209&win=uploaded	Eliff pers. comm. (FishBase)
Seriola	aureovittata	Actinopterygii	Carangiformes	Carangidae	fusiform	FALSE	41.94	34.51	9.327	6.424	2.882					FAKU 144547		Matsunuma et al. 2019
Seriola	carpenteri	Actinopterygii	Carangiformes	Carangidae	fusiform	FALSE	32.2	25	8.4	2.1	3.3					FSB Ser-carp-01		Capape et al. 2018
Seriola	carpenteri	Actinopterygii	Carangiformes	Carangidae	fusiform	FALSE	35.2	27.5	8.7	2.4	3.8					FSB Ser-carp-02		Capape et al. 2018
Seriola	carpenteri	Actinopterygii	Carangiformes	Carangidae	fusiform	FALSE	32.5	25.5	8.9	2.5	3.5					FSB Ser-carp-03		Capape et al. 2018
Seriola	carpenteri	Actinopterygii	Carangiformes	Carangidae	fusiform	FALSE	40	31	10	2.6	4					FSB Ser-carp-04		Capape et al. 2018
Seriola	dumerili	Actinopterygii	Carangiformes	Carangidae	fusiform	FALSE	31.485	25.233	7.357	4.95						FAKU 146556		Matsunuma et al. 2019
Seriola	dumerili	Actinopterygii	Carangiformes	Carangidae	fusiform	FALSE	32.405	26.614	8.016	5.836	3.43				adult			Lin and Shao 1999
Seriola	dumerili	Actinopterygii	Carangiformes	Carangidae	fusiform	FALSE	41.7	33.166	9.244	6.443	3.4				adult			Lin and Shao 1999
Seriola	fasciata	Actinopterygii	Carangiformes	Carangidae	fusiform	FALSE	21.5	18.5	5.27		2.23				adult	Sflc9	Despite small size, considered to be mature	Andaloro et al. 2005
Seriola	fasciata	Actinopterygii	Carangiformes	Carangidae	fusiform	FALSE	25	21	6.45		2.67				adult	Sflc2	Despite small size, considered to be mature	Andaloro et al. 2005
Seriola	fasciata	Actinopterygii	Carangiformes	Carangidae	fusiform	FALSE	26	21	6.3		2.67				adult	Sflc4	Despite small size, considered to be mature	Andaloro et al. 2005
Seriola	fasciata	Actinopterygii	Carangiformes	Carangidae	fusiform	FALSE	26	21	6.45		2.79				adult	Sflc6	Despite small size, considered to be mature	Andaloro et al. 2005
Seriola	fasciata	Actinopterygii	Carangiformes	Carangidae	fusiform	FALSE	27	22	6.35		2.7				adult	Sflc8	Despite small size, considered to be mature	Andaloro et al. 2005
Seriola	fasciata	Actinopterygii	Carangiformes	Carangidae	fusiform	FALSE	28	23	6.78		2.8				adult	Sflc5	Despite small size, considered to be mature	Andaloro et al. 2005
Seriola	fasciata	Actinopterygii	Carangiformes	Carangidae	fusiform	FALSE	28	24	6.95		3.03				adult	Sflc1	Despite small size, considered to be mature	Andaloro et al. 2005
Seriola	fasciata	Actinopterygii	Carangiformes	Carangidae	fusiform	FALSE	31.5	25.5	7.49		3.21				adult	Sflc7	Despite small size, considered to be mature	Andaloro et al. 2005
Seriola	fasciata	Actinopterygii	Carangiformes	Carangidae	fusiform	FALSE	33.5	28	7.82		3.4				adult	Sflc3	Despite small size, considered to be mature	Andaloro et al. 2005
Seriola	lalandi	Actinopterygii	Carangiformes	Carangidae	fusiform	FALSE	94.959	77.424	18.234	12.292	6.834						Accessed from Fishbase at https://www.fishbase.de/photos/UploadedBy.php?autoctr=25340&win=uploaded	Duffy pers. comm. (FishBase)
Seriola	lalandi	Actinopterygii	Carangiformes	Carangidae	fusiform	FALSE	85.3	70.6	18.245	12.8	7.093							Randall 1997
Seriola	lalandi	Actinopterygii	Carangiformes	Carangidae	fusiform	FALSE	70.39	57.71	14.572	9.352	5.412						Picture from iNaturalist at https://www.inaturalist.org/observations/67811507	Duffy pers. comm. (iNaturalist)
Seriola	quinqueradiata	Actinopterygii	Carangiformes	Carangidae	fusiform	FALSE	37.064	30.622	9.128	6.589						FAKU 135235		Matsunuma et al. 2019
Seriola	rivoliana	Actinopterygii	Carangiformes	Carangidae	fusiform	FALSE	34.34	27.875	7.463	5.419	2.99					FAKU 143582		Matsunuma et al. 2019
Seriola	rivoliana	Actinopterygii	Carangiformes	Carangidae	fusiform	FALSE	47.2	38.5	10.384	7.436	3.932							Randall 1997, Mihalitsis and Bellwood 2019
Seriola	rivoliana	Actinopterygii	Carangiformes	Carangidae	fusiform	FALSE	66	53.8	14.098	9.892	5.505							Randall 1997, Mihalitsis and Bellwood 2019
Seriola	rivoliana	Actinopterygii	Carangiformes	Carangidae	fusiform	FALSE	74.2	62	16.565	11.973	6.507							Randall 1997
Seriola	rivoliana	Actinopterygii	Carangiformes	Carangidae	fusiform	FALSE	89	80	19.9	14.6	8					USNM 22258		Goode and Bean 1879a
Seriolina	nigrofasciata	Actinopterygii	Carangiformes	Carangidae	fusiform	FALSE	28.78	23.327	6.147	3.852	2.703					FAKU 139605		Matsunuma et al. 2019
Seriolina	nigrofasciata	Actinopterygii	Carangiformes	Carangidae	fusiform	FALSE	19.803	15.774	4.058	2.387								Ray et al. 2021
Trachinotus	baillonii	Actinopterygii	Carangiformes	Carangidae	fusiform	FALSE	33.578	22.492	5.178	3.604	1.91				adult			Lin and Shao 1999
Trachinotus	blochii	Actinopterygii	Carangiformes	Carangidae	compressiform	FALSE	30.282	21.681	5.41	3.98	2.19				adult			Lin and Shao 1999
Trachinotus	botla	Actinopterygii	Carangiformes	Carangidae	compressiform	FALSE	37.5	25.8	5.706	3.766	2.339							Randall 1997
Trachinotus	mookalee	Actinopterygii	Carangiformes	Carangidae	fusiform	FALSE	71.5	54.8	11.92	5.31	4.16							Randall 1997
Trachurus	japonicus	Actinopterygii	Carangiformes	Carangidae	fusiform	FALSE	28.404	23.825	6.006	4.354	2.799					FAKU 146557		Matsunuma et al. 2019
Ulua	mentalis	Actinopterygii	Carangiformes	Carangidae	compressiform	FALSE	17.257	13.153	3.526	2.265								Ray et al. 2021
Uraspis	helvola	Actinopterygii	Carangiformes	Carangidae	compressiform	FALSE	32.298	26.3	7.096	4.805						FAKU 132150		Matsunuma et al. 2019
Scyliorhinus	cabofriensis	Actinopterygii	Carcharhiniformes	Scyliorhinidae	elongate	FALSE	38.12	29.72	7.77	5.91	1.55	2.98						Soares et al. 2016
Scyliorhinus	hachijoensis	Actinopterygii	Carcharhiniformes	Scyliorhinidae	elongate	FALSE	37	28.601	6.993	5.217	1.073	3.182				NSMT-P135960		Ito et al. 2022
Scyliorhinus	hachijoensis	Actinopterygii	Carcharhiniformes	Scyliorhinidae	elongate	FALSE	35.3	26.4044	6.4952	4.8361	1.059	3.0358						Ito et al. 2022
Scyliorhinus	haeckeli	Actinopterygii	Carcharhiniformes	Scyliorhinidae	elongate	FALSE	35.44	27.56	7.1	5.42	1.49	2.78						Soares et al. 2016
Scyliorhinus	torazame	Actinopterygii	Carcharhiniformes	Scyliorhinidae	elongate	FALSE	35.7	26.3466	6.4617	4.8195	1.071	2.9274						Ito et al. 2022
Scyliorhinus	ugoi	Actinopterygii	Carcharhiniformes	Scyliorhinidae	elongate	FALSE	51.6	39.37	10.32	7.66	2.35	4.66						Soares et al. 2015
Amblopites	rupestris	Actinopterygii	Centrarchiformes	Centrarchidae	compressiform	FALSE	6.202	5.059	1.906	1.385	0.765	0.501			juvenile	CMNH 9619a		Present Study
Amblopites	rupestris	Actinopterygii	Centrarchiformes	Centrarchidae	compressiform	FALSE	20.2	17.1	5.515	3.805	2.588	2.114				CMNH 9619b		Present Study
Amblopites	rupestris	Actinopterygii	Centrarchiformes	Centrarchidae	compressiform	FALSE	7.346	5.907	2.218	1.542	0.931	0.575			juvenile	CMNH 9619c		Present Study
Amblopites	rupestris	Actinopterygii	Centrarchiformes	Centrarchidae	compressiform	FALSE	18.9	15.4	5.249	3.416	2.349	1.753				CMNH 9619d		Present Study
Amblopites	rupestris	Actinopterygii	Centrarchiformes	Centrarchidae	compressiform	FALSE	14.8	12.1	4.382	3.121	2.032	1.701				CMNH 9619e		Present Study
Amblopites	rupestris	Actinopterygii	Centrarchiformes	Centrarchidae	compressiform	FALSE	19.1	16	5.275	3.849	2.487	2.015				CMNH 9619f		Present Study
Amblopites	rupestris	Actinopterygii	Centrarchiformes	Centrarchidae	compressiform	FALSE	5.173	4.175	1.537	1.088	0.614	0.502			juvenile	CMNH 1997a		Present Study
Amblopites	rupestris	Actinopterygii	Centrarchiformes	Centrarchidae	compressiform	FALSE	10.534	8.278	3.046	2.207	1.445	1.068			juvenile	CMNH 1997b		Present Study
Amblopites	rupestris	Actinopterygii	Centrarchiformes	Centrarchidae	compressiform	FALSE	4.29	3.473	1.364	0.975	0.521	0.292			juvenile	CMNH 1997c		Present Study
Amblopites	rupestris	Actinopterygii	Centrarchiformes	Centrarchidae	compressiform	FALSE	18.4	15.1	5.301	3.744	2.741	1.964				CMNH 1997d		Present Study
Amblopites	rupestris	Actinopterygii	Centrarchiformes	Centrarchidae	compressiform	FALSE	10.861	8.728	3.395	2.41	1.476	1.066			juvenile	CMNH 1997e		Present Study
Amblopites	rupestris	Actinopterygii	Centrarchiformes	Centrarchidae	compressiform	FALSE	18.5	14.9	5.435	3.79	2.532	1.937				CMNH 1997f		Present Study
Amblopites	rupestris	Actinopterygii	Centrarchiformes	Centrarchidae	compressiform	FALSE	18	14.8	5.368	3.721	2.659	1.92				CMNH 1997g		Present Study
Kyphosus	incisor	Actinopterygii	Centrarchiformes	Kyphosidae	fusiform	FALSE	31	23.2	6.515	4.638	1.5							Azzurro et al. 2013
Kyphosus	sectatrix	Actinopterygii	Centrarchiformes	Kyphosidae	fusiform	FALSE	48.9	37.3	9.7									Francour and Mouine 2006
Kyphosus	sectatrix	Actinopterygii	Centrarchiformes	Kyphosidae	fusiform	FALSE	49.5	41.5	9	6.094								Ligas et al. 2011
Kyphosus	sectatrix	Actinopterygii	Centrarchiformes	Kyphosidae	fusiform	FALSE	26.5	20.9	5.41									Kiparissis et al. 2012
Kyphosus	sectatrix	Actinopterygii	Centrarchiformes	Kyphosidae	fusiform	FALSE	47.5	38.5	9.9	6.57	2.08							Elbaraasi et al. 2013
Kyphosus	sectatrix	Actinopterygii	Centrarchiformes	Kyphosidae	fusiform	FALSE	52.3	40.1	9.8									Canas et al. 2005
Kyphosus	vaigensis	Actinopterygii	Centrarchiformes	Kyphosidae	fusiform	FALSE	41.5	31	9.2		3							Groud et al. 2021
Kyphosus	vaigensis	Actinopterygii	Centrarchiformes	Kyphosidae	fusiform	FALSE	53.11	45.85	10.38	6.77	2.6							Kiyağa et al. 2019
Latris	lineata	Actinopterygii	Centrarchiformes	Latridae	fusiform	FALSE	99.67	86	26.63	18.32	6.77							Roberts 2003
Lepomis	cyanellus	Actinopterygii	Centrarchiformes	Centrarchidae	compressiform	FALSE	7.139	5.484	2.201	1.504	0.65	0.551				CMNH 2783a		Present Study
Lepomis	cyanellus	Actinopterygii	Centrarchiformes	Centrarchidae	compressiform	FALSE	16.9	14	4.863	3.139	1.605	1.663				CMNH 2783b		Present Study
Lepomis	cyanellus	Actinopterygii	Centrarchiformes	Centrarchidae	compressiform	FALSE	6.555	5.085	1.85	1.341	0.585	0.535				CMNH 2783c		Present Study
Lepomis	cyanellus	Actinopterygii	Centrarchiformes	Centrarchidae	compressiform	FALSE	12.4	10	3.856	2.337	1.484	1.142				CMNH 6174a		Present Study
Lepomis	cyanellus	Actinopterygii	Centrarchiformes	Centrarchidae	compressiform	FALSE	14.3	11.5	4.09	2.582	1.571	1.254				CMNH 6174b		Present Study
Lepomis	gibbosus	Actinopterygii	Centrarchiformes	Centrarchidae	compressiform	FALSE	14.5	11.6	4.106	2.536	1.088	1.046				CMNH 1674		Present Study
Lepomis	gibbosus	Actinopterygii	Centrarchiformes	Centrarchidae	compressiform	FALSE	14.6	11.8	4.2	2.966	0.929	1.161				CMNH 9145a		Present Study
Lepomis	gibbosus	Actinopterygii	Centrarchiformes	Centrarchidae	compressiform	FALSE	15.2	12.2	4.352	2.507	1.285	1.153				CMNH 9145b		Present Study
Lepomis	gibbosus	Actinopterygii	Centrarchiformes	Centrarchidae	compressiform	FALSE	14.2	11.65	3.68	2.335	1.148	1.054				CMNH 9145c		Present Study
Lepomis	gibbosus	Actinopterygii	Centrarchiformes	Centrarchidae	compressiform	FALSE	15.9	13	4.124	2.561	1.235	1.154				CMNH 9145d		Present Study
Micropterus	dolomieu	Actinopterygii	Centrarchiformes	Centrarchidae	fusiform	FALSE	7.789	6.281	2.198	1.546	0.929	0.685			juvenile	CMNH 7412a	smallest	Present Study
Micropterus	dolomieu	Actinopterygii	Centrarchiformes	Centrarchidae	fusiform	FALSE	11.554	9.478	3.233	2.261	1.576	1.211			juvenile	CMNH 7412b	medium	Present Study
Micropterus	dolomieu	Actinopterygii	Centrarchiformes	Centrarchidae	fusiform	FALSE	23.3	19.6	5.999	4.081	2.93	2.309			subadult?	CMNH 7412c	large	Present Study
Micropterus	dolomieu	Actinopterygii	Centrarchiformes	Centrarchidae	fusiform	FALSE	25.4	21.3	6.996	4.946	2.997	2.202			subadult?	CMNH ZE173a		Present Study
Micropterus	dolomieu	Actinopterygii	Centrarchiformes	Centrarchidae	fusiform	FALSE	25	20.9	6.529	4.909	3.089	1.899			subadult?	CMNH ZE137b		Present Study
Micropterus	dolomieu	Actinopterygii	Centrarchiformes	Centrarchidae	fusiform	FALSE	28.7	25	6.989	4.553	3.877	3.999				CMNH 9141		Present Study
Micropterus	dolomieu	Actinopterygii	Centrarchiformes	Centrarchidae	fusiform	FALSE	17.22	14.412	4.615	3.559	2.012	1.783			juvenile	CMNH 2186a	smallest	Present Study
Micropterus	dolomieu	Actinopterygii	Centrarchiformes	Centrarchidae	fusiform	FALSE	29.5	25.5	6.599	4.693	2.929	2.265				CMNH 2186b	medium	Present Study
Micropterus	dolomieu	Actinopterygii	Centrarchiformes	Centrarchidae	fusiform	FALSE	35.5	31	7.869	5.283	3.612	2.762				CMNH 2186c	large	Present Study
Micropterus	dolomieu	Actinopterygii	Centrarchiformes	Centrarchidae	fusiform	FALSE	39.5	34.3	8.44	6.188	4.446	3.694				CMNH teaching collection a	superlarge	Present Study
Micropterus	dolomieu	Actinopterygii	Centrarchiformes	Centrarchidae	fusiform	FALSE	4.778	3.78	1.374	1.035	0.581	0.337			juvenile	CMNH teaching collection b	supersmall	Present Study
Micropterus	dolomieu	Actinopterygii	Centrarchiformes	Centrarchidae	fusiform	FALSE	22.3	18.3	5.883	4.193	2.728	1.972			subadult?	CMNH teaching collection c		Present Study
Micropterus	dolomieu	Actinopterygii	Centrarchiformes	Centrarchidae	fusiform	FALSE	19.4	16.1	5.78	4.53	2.298	1.878			subadult?	CMNH teaching collection d		Present Study
Micropterus	dolomieu	Actinopterygii	Centrarchiformes	Centrarchidae	fusiform	FALSE	65.67	55.35	16.74	11.11	5.05				adult			Slagle pers. comm.
Micropterus	salmoides	Actinopterygii	Centrarchiformes	Centrarchidae	fusiform	FALSE	28.1	24.2	7.133	4.887	3.576	2.722				CMNH 4758a	large	Present Study
Micropterus	salmoides	Actinopterygii	Centrarchiformes	Centrarchidae	fusiform	FALSE	21.2	18.35	5.347	3.691	2.475	1.935				CMNH 4758b	small	Present Study
Nemadactylus	macropterus	Actinopterygii	Centrarchiformes	Latridae	fusiform	FALSE	31.67	25.57	6.38	4.89	1.67						Picture from iNaturalist at https://www.inaturalist.org/observations/5424383	Duffy pers. comm. (iNaturalist)
Pomoxis	annularis	Actinopterygii	Centrarchiformes	Centrarchidae	compressiform	FALSE	24.4	20.15	6.078	4.595	3.446	1.586				CMNH KSUMZ 578		Present Study
Pomoxis	annularis	Actinopterygii	Centrarchiformes	Centrarchidae	compressiform	FALSE	17	13.3	4.595	3.059	2.182	1.194				CMNH 7163a		Present Study
Pomoxis	annularis	Actinopterygii	Centrarchiformes	Centrarchidae	compressiform	FALSE	25.5	21	7.11	5.009	3.185	1.756				CMNH 7163b		Present Study
Pomoxis	annularis	Actinopterygii	Centrarchiformes	Centrarchidae	compressiform	FALSE	25.5	19.4	6.792	4.708	3.246	1.877				CMNH 7163c		Present Study
Pomoxis	annularis	Actinopterygii	Centrarchiformes	Centrarchidae	compressiform	FALSE	17.8	14	4.863	3.258	2.216	1.059				CMNH 7163d		Present Study
Pomoxis	annularis	Actinopterygii	Centrarchiformes	Centrarchidae	compressiform	FALSE	18.8	14.6	4.612	3.227	2.13	1.078				CMNH 7163e		Present Study
Scorpis	lineolata	Actinopterygii	Centrarchiformes	Kyphosidae	compressiform	FALSE	28.384	22.27	4.768	3.227	1.771						Downloaded from iNaturalist at https://www.inaturalist.org/observations/24496301	Duffy pers. comm. (iNaturalist)
Terapon	jarbua	Actinopterygii	Centrarchiformes	Terapontidae	fusiform	FALSE	19.306	15.786	5.406	3.807	1.838							Al Mabruk et al. 2021
Terapon	jarbua	Actinopterygii	Centrarchiformes	Terapontidae	fusiform	FALSE	20.151	17	4.471	3.038	1.393					HUJ 19845		Golani and Appelbaum-Golani 2010
Acestrorhynchus	pantaneiro	Actinopterygii	Characiformes	Acestrorhynchidae	fusiform	FALSE	13.1	11.1	3.27	2.57	1.91							Einhardt et al. 2014
Astyanax	lacustreis	Actinopterygii	Characiformes	Characidae	fusiform	FALSE	7.972	6.457	1.355	0.956	0.638							Pinho et al. 2021
Brycinus	macrolepidotis	Actinopterygii	Characiformes	Alestiidae	fusiform	FALSE	12.17	10.26	2.03						juvenile			Idowu et al. 2019
Brycinus	macrolepidotis	Actinopterygii	Characiformes	Alestiidae	fusiform	FALSE	17.91	15.14	3.29						subadult			Idowu et al. 2019
Brycinus	macrolepidotis	Actinopterygii	Characiformes	Alestiidae	fusiform	FALSE	22.87	20.19	3.69									Idowu et al. 2019
Brycinus	nurse	Actinopterygii	Characiformes	Alestiidae	fusiform	FALSE	11.04	8.96	2.14									Ahmed et al. 2020
Brycon	coxeyi	Actinopterygii	Characiformes	Characidae	fusiform	FALSE	23.91	19.29	5.63	4.17	2.4					MEPN uncataloged		Lima 2017
Brycon	coxeyi	Actinopterygii	Characiformes	Characidae	fusiform	FALSE	16.52	13.15	3.55	2.59	1.43					MUSM 6136a		Lima 2017
Brycon	coxeyi	Actinopterygii	Characiformes	Characidae	fusiform	FALSE	16.71	13.58	3.98	3.05	1.75					MUSM 6136b		Lima 2017
Brycon	falcatus	Actinopterygii	Characiformes	Characidae	fusiform	FALSE	27.45	22.6	5.32	3.64	2.85					MZUSP 91493	Caudal rays damaged	Lima 2017
Brycon	falcatus	Actinopterygii	Characiformes	Characidae	fusiform	FALSE	15.07	12.24	3.24	2.14	1.38					MZUSP 17530		Lima 2017
Brycon	falcatus	Actinopterygii	Characiformes	Characidae	fusiform	FALSE	16.05	13.34	3.61	2.58	1.75					INHS 43928		Lima 2017
Brycon	falcatus	Actinopterygii	Characiformes	Characidae	fusiform	FALSE	13.85	11.1	2.83	2.12	1.31					ANSP 16212		Lima 2017
Brycon	falcatus	Actinopterygii	Characiformes	Characidae	fusiform	FALSE	14.68	11.35	3.02	2.23	1.61					INHS 61479		Lima 2017
Brycon	falcatus	Actinopterygii	Characiformes	Characidae	fusiform	FALSE	25.06	20	4.8	3.38	2.09					MZUSP 36782		Lima 2017
Brycon	falcatus	Actinopterygii	Characiformes	Characidae	fusiform	FALSE	38.33	31	6.9	4.88	3.49					MZUSP 98119		Lima 2017
Brycon	falcatus	Actinopterygii	Characiformes	Characidae	fusiform	FALSE	53	43.47	10.92	7.44	4.56					MZUSP 61132		Lima 2017
Brycon	falcatus	Actinopterygii	Characiformes	Characidae	fusiform	FALSE	35.79	29	6.12	4.21	3.39					MZUSP 103036		Lima 2017
Brycon	falcatus	Actinopterygii	Characiformes	Characidae	fusiform	FALSE	16.76	13.53	3.47	2.57	1.58					MZUSP 18077		Lima 2017
Brycon	falcatus	Actinopterygii	Characiformes	Characidae	fusiform	FALSE	24.95	20.22	4.55	3.24	2.26					MZUSP 61056		Lima 2017
Brycon	falcatus	Actinopterygii	Characiformes	Characidae	fusiform	FALSE	24.32	19.77	4.66	3.32	2.13					MZUSP 48113	Caudal rays damaged	Lima 2017
Brycon	howesi	Actinopterygii	Characiformes	Characidae	fusiform	FALSE	28.4	23.48	6	4.23	2.47					MZUSP 53803		Lima 2017
Brycon	howesi	Actinopterygii	Characiformes	Characidae	fusiform	FALSE	21.1	16.71	4.87	3.57	1.93					MZUSP 101506		Lima 2017
Brycon	insignis	Actinopterygii	Characiformes	Characidae	fusiform	FALSE	17.912	14.48	4.273	3.129	2.006					NMW 62925:2		Lima 2017
Brycon	insignis	Actinopterygii	Characiformes	Characidae	fusiform	FALSE	31.322	25.9	6.569	4.933	3.143					MZUSP 103045		Lima 2017
Brycon	insignis	Actinopterygii	Characiformes	Characidae	fusiform	FALSE	37.722	31.04	7.662	5.329	3.99					MZUSP 62746		Lima 2017
Brycon	opalinus	Actinopterygii	Characiformes	Characidae	fusiform	FALSE	32.621	27.45	6.33	4.652	2.912					MZUSP 50805		Lima 2017
Brycon	opalinus	Actinopterygii	Characiformes	Characidae	fusiform	FALSE	29.85	24.77	5.422	3.731	2.299					MZUSP 59280		Lima 2017
Brycon	opalinus	Actinopterygii	Characiformes	Characidae	fusiform	FALSE	27.957	23.32	4.669	2.956	1.869					MZUSP 19127		Lima 2017
Brycon	polylepis	Actinopterygii	Characiformes	Characidae	fusiform	FALSE	22.95	19.71	4.19	2.91	3.59					MBUCV-V 15094		Lima 2017
Brycon	polylepis	Actinopterygii	Characiformes	Characidae	fusiform	FALSE	25.86	20.39	4.42	3.32	1.88					MZUSP 70413		Lima 2017
Brycon	polylepis	Actinopterygii	Characiformes	Characidae	fusiform	FALSE	15.68	12.24	2.84	2.12	1.09					MCP 16008		Lima 2017
Brycon	polylepis	Actinopterygii	Characiformes	Characidae	fusiform	FALSE	14.83	12.41	2.69	2.01	1.04					INHS 44001		Lima 2017
Brycon	stolzmanni	Actinopterygii	Characiformes	Characidae	fusiform	FALSE	15.273	12.41	3.618	2.495	1.54					NMW 62731:1	Caudal rays damaged	Lima 2017
Brycon	stolzmanni	Actinopterygii	Characiformes	Characidae	fusiform	FALSE	19.038	16.05	4.303	3.077	1.823					ROM 52237	Caudal rays damaged	Lima 2017
Brycon	vermelha	Actinopterygii	Characiformes	Characidae	fusiform	FALSE	46.997	39.5	10.786	7.371	5.102					MZUSP 53303		Lima 2017
Brycon	vermelha	Actinopterygii	Characiformes	Characidae	fusiform	FALSE	26.699	21.53	6.159	4.632	2.87					MZUSP 70217		Lima 2017
Bryconops	cyrtogaster	Actinopterygii	Characiformes	Iguanodectidae	fusiform	FALSE	8.772	7.4	1.6537	1.249	1.079					BMNH 1926.495-514a		Silva-Oliveira et al. 2020
Bryconops	cyrtogaster	Actinopterygii	Characiformes	Iguanodectidae	fusiform	FALSE	8.657	7.01	1.591	1.235	1.01					BMNH 1926.495-514b		Silva-Oliveira et al. 2020
Bryconops	cyrtogaster	Actinopterygii	Characiformes	Iguanodectidae	fusiform	FALSE	12.354	10.46	2.368	1.847	1.507					MNRJ 15158		Silva-Oliveira et al. 2020
Bryconops	marabaixo	Actinopterygii	Characiformes	Iguanodectidae	fusiform	FALSE	7.543	6.17	1.517	1.146	0.827					MZUSP 125767		Silva-Oliveira et al. 2020
Bryconops	marabaixo	Actinopterygii	Characiformes	Iguanodectidae	fusiform	FALSE	7.055	5.95	1.474	1.109	0.783					MZUSP 101562		Silva-Oliveira et al. 2020
Catoprion	absconditus	Actinopterygii	Characiformes	Serrasalmidae	compressiform	FALSE	9.393	7.83	1.994	1.438	0.982					MZUSP 125764		Bonnani Mateussi et al. 2020
Catoprion	absconditus	Actinopterygii	Characiformes	Serrasalmidae	compressiform	FALSE	11.769	9.37	2.465	1.677	1.041					MZUSP 50015		Bonnani Mateussi et al. 2020
Catoprion	absconditus	Actinopterygii	Characiformes	Serrasalmidae	compressiform	FALSE	15.169	12.1	3.06	2.047	1.853					INPA 37246		Bonnani Mateussi et al. 2020
Catoprion	mento	Actinopterygii	Characiformes	Serrasalmidae	compressiform	FALSE	6.894	5.5	1.345	0.953	0.75					LBP 3820		Bonnani Mateussi et al. 2020
Catoprion	mento	Actinopterygii	Characiformes	Serrasalmidae	compressiform	FALSE	9.28	7.4	1.79	1.27	1.11					LBP 7556a		Bonnani Mateussi et al. 2020
Catoprion	mento	Actinopterygii	Characiformes	Serrasalmidae	compressiform	FALSE	8.36	6.5	1.77	1.26	0.98					LBP 7556b		Bonnani Mateussi et al. 2020
Cheirodon	affinis	Actinopterygii	Characiformes	Characidae	fusiform	FALSE	3.5947	2.95	0.6613	0.4747						FMNH 8944		Fink and Weitzman 1974
Cheirodon	affinis	Actinopterygii	Characiformes	Characidae	fusiform	FALSE	3.3082	2.65	0.5878	0.4599						USNM 210991		Fink and Weitzman 1974
Cheirodon	gorgonae	Actinopterygii	Characiformes	Characidae	fusiform	FALSE	3.2576	2.6	0.5851	0.4289						USNM 208543		Fink and Weitzman 1974
Colossoma	macropomum	Actinopterygii	Characiformes	Serrasalmidae	compressiform	FALSE	60.19	46.8	13.28	8.019								Hilsdorf et al. 2021
Colossoma	macropomum	Actinopterygii	Characiformes	Serrasalmidae	compressiform	FALSE	66.22	52.557	14.884	8.969								Pinho et al. 2021
Colossoma	macropomum	Actinopterygii	Characiformes	Serrasalmidae	compressiform	FALSE	69.3	54.5	15.733	9.5	2.86	5.131				FSBC 8048		Present Study
Colossoma	macropomum	Actinopterygii	Characiformes	Serrasalmidae	compressiform	FALSE	67.929	57	15.958	9.416	5.476				adult			Escobar et al. 2019
Cynodon	gibbus	Actinopterygii	Characiformes	Cynodontidae	fusiform	FALSE	16.8	14.64	2.81	1.75	2.56					MZUSP 6539		Toledo-Piza 2000
Cynopotamus	xinguano	Actinopterygii	Characiformes	Characidae	fusiform	FALSE	12.103	10	2.669	2.12	1.849					MZUSP 94009		Menezes 2007
Cynopotamus	xinguano	Actinopterygii	Characiformes	Characidae	fusiform	FALSE	15.8659	12.77	3.831		2.60125							Menezes 2007
Gymnocorymbus	thayeri	Actinopterygii	Characiformes	Characidae	compressiform	FALSE	7.181	5.64	1.278	0.961	0.587					LBP 9163		Benine et al. 2015
Gymnocorymbus	thayeri	Actinopterygii	Characiformes	Characidae	compressiform	FALSE	5.717	4.62	1.007	0.717	0.515					ANSP 130539		Benine et al. 2015
Gymnocorymbus	thayeri	Actinopterygii	Characiformes	Characidae	compressiform	FALSE	10.1	8.09	1.741	1.278	0.894					MZUSP 93375		Benine et al. 2015
Hemibrycon	beni	Actinopterygii	Characiformes	Characidae	fusiform	FALSE	5.98027	4.55	1.1921		0.561479						Total length estimated based on standard length/total length ratio of the syntype CAS 44333	Bertaco and Malabarba 2010
Hemibrycon	helleri	Actinopterygii	Characiformes	Characidae	fusiform	FALSE	7.57973	6.09	1.43115		0.649742						Total length estimated based on standard length/total length ratio of ANSP 180775	Bertaco and Malabarba 2010
Hemibrycon	huambonicus	Actinopterygii	Characiformes	Characidae	fusiform	FALSE	8.97287	6.95	1.6819								Total length estimated based on standard length/total length ratio of figured specimen ROM 55406	Bertaco and Malabarba 2010
Hemibrycon	inambari	Actinopterygii	Characiformes	Characidae	fusiform	FALSE	6.60216	5.17	1.21495								Total length estimated based on standard length/total length ratio of figured specimen MUSM 35491	Bertaco and Malabarba 2010
Hemibrycon	taeniurus	Actinopterygii	Characiformes	Characidae	fusiform	FALSE	7.4563	5.75	1.29375								Syntypes of H. guppyi. Total length estimated based on standard length/total length ratio of figured specimen AMNH 215239	Bertaco and Malabarba 2010
Hemibrycon	taeniurus	Actinopterygii	Characiformes	Characidae	fusiform	FALSE	8.09171	6.24	1.39152								Total length estimated based on standard length/total length ratio of figured specimen AMNH 215239	Bertaco and Malabarba 2010
Hepsetus	akawo	Actinopterygii	Characiformes	Hepsetidae	fusiform	FALSE	27.77	21.15	7.25445	5.24	4.15							Decru et al. 2012
Hepsetus	odoe	Actinopterygii	Characiformes	Hepsetidae	fusiform	FALSE	32.071	28.8	8.496	6.66	3.955					MRAC B0-16-P-1-10		Decru et al. 2012
Hoplias	microlepis	Actinopterygii	Characiformes	Erythrinidae	fusiform	FALSE	37.82	32.14	8.31		2.18							Gonzalez-Martinez et al. 2021
Hydrocynus	brevis	Actinopterygii	Characiformes	Alestiidae	fusiform	FALSE	17.122	13.452	3.657	2.648	1.532					CAS 82700a		Monarch 2022
Hydrocynus	brevis	Actinopterygii	Characiformes	Alestiidae	fusiform	FALSE	15.491	12.015	3.435	2.547	1.555					CAS 82700b		Monarch 2022
Hydrocynus	brevis	Actinopterygii	Characiformes	Alestiidae	fusiform	FALSE	16.66	13.245	3.724	2.719	1.567					CAS 82699		Monarch 2022
Hydrocynus	forskahlii	Actinopterygii	Characiformes	Alestiidae	fusiform	FALSE	24.893	19.466	5.145	3.883	2.163					CAS SU 63349		Monarch 2022
Hydrocynus	forskahlii	Actinopterygii	Characiformes	Alestiidae	fusiform	FALSE	23.376	18.696	5.016	3.808	2.342					CAS SU 64790		Monarch 2022
Hydrocynus	forskahlii	Actinopterygii	Characiformes	Alestiidae	fusiform	FALSE	22.836	17.398	4.297	3.2	1.926					CAS SU 55380		Monarch 2022
Hydrocynus	forskahlii	Actinopterygii	Characiformes	Alestiidae	fusiform	FALSE	20.485	15.322	4.187	3.151	1.716					CAS SU 64848		Monarch 2022
Hydrocynus	tanzaniae	Actinopterygii	Characiformes	Alestidae	fusiform	FALSE	27.197	23.712	6.522	5.239	3.063					NHMUK 1976.10.21		Brewster 1986
Hydrolycus	armatus	Actinopterygii	Characiformes	Cynodontidae	fusiform	FALSE	25.5	21.8	5.3628	4.13	4.54229							Toledo-Piza et al. 1999
Hydrolycus	tatauaia	Actinopterygii	Characiformes	Cynodontidae	fusiform	FALSE	29.5	26.8	6.0032									Toledo-Piza et al. 1999
Hydrolycus	wallacei	Actinopterygii	Characiformes	Cynodontidae	fusiform	FALSE	33.5216	28.6	6.2062	4.4	4.82842					MZUSP 32645		Toledo-Piza et al. 1999
Hyphessobrycon	piranga	Actinopterygii	Characiformes	Characidae	fusiform	FALSE	2.617	2.05	0.515	0.392	0.231				adult	MZUSP 117781		Camelier et al. 2018
Hyphessobrycon	piranga	Actinopterygii	Characiformes	Characidae	fusiform	FALSE	2.449	1.96	0.473	0.373	0.324				adult	MZUSP 118169a		Camelier et al. 2018
Hyphessobrycon	piranga	Actinopterygii	Characiformes	Characidae	fusiform	FALSE	2.458	2.01	0.49	0.379	0.206				adult	MZUSP 118169b		Camelier et al. 2018
Hypomasticus	despaxi	Actinopterygii	Characiformes	Anostomatidae	fusiform	FALSE	11.266	9.1407	2.1835	1.6895	0.382					ANSP 189010	Standard length listed as 65.3 mm, but scale bar says fish is 91 mm in standard length	Birindelli et al. 2013
Hypomasticus	lineomaculatus	Actinopterygii	Characiformes	Anostomatidae	fusiform	FALSE	8.3919	6.35	1.4086	1.0697	0.239					MPEG 15573		Birindelli et al. 2013
Leporinus	ecuadorensis	Actinopterygii	Characiformes	Anostomidae	fusiform	FALSE	20.82	18.88	3.88		0.8							Gonzalez-Martinez et al. 2021
Metynnis	melanogrammus	Actinopterygii	Characiformes	Serrasalmidae	compressiform	FALSE	17.25	14.13	3.63	2.658	1.512					INPA 52216		Ota et al. 2016
Metynnis	melanogrammus	Actinopterygii	Characiformes	Serrasalmidae	compressiform	FALSE	17.06	14.94	3.435	2.529	1.324					INPA 34811		Ota et al. 2016
Moenkhausia	celibela	Actinopterygii	Characiformes	Characidae	fusiform	FALSE	4.13	3.19	0.82	0.66		0.3936				MZUSP 102984		Marinho and Langeani 2010
Myloplus	nigrolineatus	Actinopterygii	Characiformes	Serrasalmidae	compressiform	FALSE	23.47	19.91	5.48	3.92	1.96					INPA 23312a		Ota et al. 2020
Myloplus	nigrolineatus	Actinopterygii	Characiformes	Serrasalmidae	compressiform	FALSE	23.01	18.2	4.95	3.36	2.08					INPA 23312b		Ota et al. 2020
Myloplus	nigrolineatus	Actinopterygii	Characiformes	Serrasalmidae	compressiform	FALSE	26.85	22.19	6.39	4.28	2.62	2.12787				INPA 54773		Ota et al. 2020
Mylossoma	albiscopum	Actinopterygii	Characiformes	Serrasalmidae	compressiform	FALSE	16.315	13.2	3.438	2.337	1.337				adult			Escobar et al. 2019
Oligosarcus	jacuiensis	Actinopterygii	Characiformes	Characidae	fusiform	FALSE	18.205	15.3	4.363	3.455						MCP 28980		Menezes and Ribeiro 2010
Oligosarcus	paranensis	Actinopterygii	Characiformes	Characidae	fusiform	FALSE	14.352	12.01	3.335	2.327								dos Santos and Renesto 2013
Ossubtus	xinguense	Actinopterygii	Characiformes	Serrasalmidae	compressiform	FALSE	25.79	20.27	5.32	3.98	0.97					GEA 1973a		Andrade et al. 2016
Ossubtus	xinguense	Actinopterygii	Characiformes	Serrasalmidae	compressiform	FALSE	20.72	16.85	4.26	3.24	0.87					GEA 1973b	Pelvic fins missing but their origin estimated based on their remnant location and where they occur in other specimens of O. xinguense	Andrade et al. 2016
Piaractus	brachypomus	Actinopterygii	Characiformes	Serrasalmidae	compressiform	FALSE	84.1	73.9	21.4	14.656						FSBC 19358		Ruis-Carus and Davis 2003
Piaractus	brachypomus	Actinopterygii	Characiformes	Serrasalmidae	compressiform	FALSE	24.525	21	6.248	4.296	2.489				adult			Escobar et al. 2019
Piaractus	brachypomus	Actinopterygii	Characiformes	Serrasalmidae	compressiform	FALSE	37.525	31.5	8.17	5.68	2.896				adult	UFRO 6289		Escobar et al. 2019
Piaractus	mesopotamicus	Actinopterygii	Characiformes	Serrasalmidae	compressiform	FALSE	23.714	21	4.153	2.453	1.734				adult			Escobar et al. 2019
Piaractus	orinoquensis	Actinopterygii	Characiformes	Serrasalmidae	compressiform	FALSE	32.569	25.7	7.524	5.074	2.884				adult			Escobar et al. 2019
Piraractus	mesopotamicus	Actinopterygii	Characiformes	Serrasalmidae	compressiform	FALSE	27.53	21.74	6.043	4.242	2.14				juvenile			Pinho et al. 2021
Priocharax	ariel	Actinopterygii	Characiformes	Characidae	fusiform	FALSE	1.769	1.465	0.335	0.241	0.171				adult	MZUSP 109199a		Mattox et al. 2016
Priocharax	ariel	Actinopterygii	Characiformes	Characidae	fusiform	FALSE	1.68	1.352	0.301	0.225	0.161				adult	MZUSP 109199b		Mattox et al. 2016
Pygocentrus	nattereri	Actinopterygii	Characiformes	Serrasalmidae	compressiform	FALSE	14.3903	12.09	4.2315								Total length estimated using equations of Giarizzo et al. 2015	Fink 1993
Pygocentrus	nattereri	Actinopterygii	Characiformes	Serrasalmidae	compressiform	FALSE	15	12.31	4.252	3.138								Nakayama et al. 2012
Rhaphiodon	vulpinus	Actinopterygii	Characiformes	Cynodontidae	elongate	FALSE	34.25	30.3	5.8479	3.87	4.05259					MNHN 822		Toledo-Piza 2000
Rhaphiodon	vulpinus	Actinopterygii	Characiformes	Cynodontidae	elongate	FALSE	68.29	62.3	11.5255	6.97	8.03327					UMZC (ZMC) 183		Toledo-Piza 2000
Salminus	brasiliensis	Actinopterygii	Characiformes	Characidae	fusiform	FALSE	43.0209	36.4	10.8657								Length measured as standard length, but converted to total length using equation in Llamazares Vegh et al. 2014	Fuster de Plaza 1950
Salminus	brasiliensis	Actinopterygii	Characiformes	Characidae	fusiform	FALSE	45.4989	38.5	11.9938								Length measured as standard length, but converted to total length using equation in Llamazares Vegh et al. 2014	Fuster de Plaza 1950
Salminus	brasiliensis	Actinopterygii	Characiformes	Characidae	fusiform	FALSE	46.3249	39.2	12.0245								Length measured as standard length, but converted to total length using equation in Llamazares Vegh et al. 2014	Fuster de Plaza 1950
Salminus	brasiliensis	Actinopterygii	Characiformes	Characidae	fusiform	FALSE	50.8089	43	13.522								Length measured as standard length, but converted to total length using equation in Llamazares Vegh et al. 2014	Fuster de Plaza 1950
Salminus	brasiliensis	Actinopterygii	Characiformes	Characidae	fusiform	FALSE	51.0449	43.2	13.012								Length measured as standard length, but converted to total length using equation in Llamazares Vegh et al. 2014	Fuster de Plaza 1950
Salminus	brasiliensis	Actinopterygii	Characiformes	Characidae	fusiform	FALSE	60.0129	50.8	15.2096								Length measured as standard length, but converted to total length using equation in Llamazares Vegh et al. 2014	Fuster de Plaza 1950
Salminus	brasiliensis	Actinopterygii	Characiformes	Characidae	fusiform	FALSE	64.4969	54.6	16.3473								Length measured as standard length, but converted to total length using equation in Llamazares Vegh et al. 2014	Fuster de Plaza 1950
Salminus	brasiliensis	Actinopterygii	Characiformes	Characidae	fusiform	FALSE	66.7389	56.5	16.8155								Length measured as standard length, but converted to total length using equation in Llamazares Vegh et al. 2014	Fuster de Plaza 1950
Salminus	brasiliensis	Actinopterygii	Characiformes	Characidae	fusiform	FALSE	68.9809	58.4	17.1261								Length measured as standard length, but converted to total length using equation in Llamazares Vegh et al. 2014	Fuster de Plaza 1950
Salminus	brasiliensis	Actinopterygii	Characiformes	Characidae	fusiform	FALSE	70.5149	59.7	17.5588								Length measured as standard length, but converted to total length using equation in Llamazares Vegh et al. 2014	Fuster de Plaza 1950
Salminus	brasiliensis	Actinopterygii	Characiformes	Characidae	fusiform	FALSE	75.5889	64	18.0282								Length measured as standard length, but converted to total length using equation in Llamazares Vegh et al. 2014	Fuster de Plaza 1950
Salminus	brasiliensis	Actinopterygii	Characiformes	Characidae	fusiform	FALSE	75.5889	64	18.3908								Length measured as standard length, but converted to total length using equation in Llamazares Vegh et al. 2014	Fuster de Plaza 1950
Salminus	brasiliensis	Actinopterygii	Characiformes	Characidae	fusiform	FALSE	78.4209	66.4	20.0604								Length measured as standard length, but converted to total length using equation in Llamazares Vegh et al. 2014	Fuster de Plaza 1950
Salminus	brasiliensis	Actinopterygii	Characiformes	Characidae	fusiform	FALSE	80.7809	68.4	20								Length measured as standard length, but converted to total length using equation in Llamazares Vegh et al. 2014	Fuster de Plaza 1950
Salminus	brasiliensis	Actinopterygii	Characiformes	Characidae	fusiform	FALSE	83.8489	71	21.4502								Length measured as standard length, but converted to total length using equation in Llamazares Vegh et al. 2014	Fuster de Plaza 1950
Salminus	franciscanus	Actinopterygii	Characiformes	Characidae	fusiform	FALSE	35.761	32.4	8.559	6.369	4.46					MZUSP 89625		Lima and Britski 2007
Salminus	franciscanus	Actinopterygii	Characiformes	Characidae	fusiform	FALSE	51.05	45.1	12.887	9.344	7.2					MZUSP 38999		Lima and Britski 2007
Serrasalmus	elongatus	Actinopterygii	Characiformes	Serrasalmidae	fusiform	FALSE	19.5	16.498	4.929	3.748								Nakayama et al. 2012
Serrasalmus	gerryi	Actinopterygii	Characiformes	Serrasalmidae	compressiform	FALSE	21.43	18.3	6.19	4.94	2.66	2.47						Deprá et al. 2021
Serrasalmus	maculatus	Actinopterygii	Characiformes	Serrasalmidae	compressiform	FALSE	15.5	12.402	3.897	2.898								Nakayama et al. 2012
Serrasalmus	rhombeus	Actinopterygii	Characiformes	Serrasalmidae	compressiform	FALSE	17.5	14.632	4.448	3.565								Nakayama et al. 2012
Serrasalmus	spilopleura	Actinopterygii	Characiformes	Serrasalmidae	compressiform	FALSE	26.5	22.6	7.3									Gómez et al. 2004
Serrasalmus	spilopleura	Actinopterygii	Characiformes	Serrasalmidae	compressiform	FALSE	26.3	22.8	7									Gómez et al. 2004
Tometes	ancylorhynchus	Actinopterygii	Characiformes	Serrasalmidae	compressiform	FALSE	10.4765	9.42	2.33616		1.52604	0.67515					Total length estimated from Galvão da Silva et al. 2020	Andrade et al. 2016
Tometes	ancylorhynchus	Actinopterygii	Characiformes	Serrasalmidae	compressiform	FALSE	18.301	15.04	3.188	2.331	1.56416	0.946836				MPEG 31014	Holotype of T. ancylorhynchus	Andrade et al. 2016
Tometes	ancylorhynchus	Actinopterygii	Characiformes	Serrasalmidae	compressiform	FALSE	18.857	15.25	3.351	2.877						MPEG 31015		Andrade et al. 2016
Tometes	ancylorhynchus	Actinopterygii	Characiformes	Serrasalmidae	compressiform	FALSE	19.47	15.97	3.417	2.607						MPEG 31016		Andrade et al. 2016
Tometes	kranponhah	Actinopterygii	Characiformes	Serrasalmidae	compressiform	FALSE	13.1416	11.99	3.1174		0.604776	0.975746					Total length estimated from Galvão da Silva et al. 2020	Andrade et al. 2016
Tometes	kranponhah	Actinopterygii	Characiformes	Serrasalmidae	compressiform	FALSE	40.82	35	8.75	6.25	2.56					MPEG 31003		Andrade et al. 2016
Tometes	kranponhah	Actinopterygii	Characiformes	Serrasalmidae	compressiform	FALSE	36.9834	30.6	9.01	7.13	3.19					GEA 1719	Total length estimated from fork length in other specimens as tail is damaged	Andrade et al. 2016
Tometes	kranponhah	Actinopterygii	Characiformes	Serrasalmidae	compressiform	FALSE	40.79	34.5	9.17	6.9	2.41					ANSP 193019		Andrade et al. 2016
Tometes	kranponhah	Actinopterygii	Characiformes	Serrasalmidae	compressiform	FALSE	14.4275	13.23	3.24135	2.565		0.962681				MPEG 31000	Total length estimated from Galvão da Silva et al. 2020	Andrade et al. 2016
Tucanoichthys	tucano	Actinopterygii	Characiformes	Characidae	fusiform	FALSE	1.899	1.509	0.357	0.265	0.208				adult	TCWC 20316.02		Mattox and Conway 2021
Tucanoichthys	tucano	Actinopterygii	Characiformes	Characidae	fusiform	FALSE	1.744	1.422	0.337	0.254	0.18				adult	TCWC 20316.01		Mattox and Conway 2021
Xenurobrycon	varii	Actinopterygii	Characiformes	Characidae	fusiform	FALSE	1.729	1.28	0.322	0.251	0.164					MPEG 32825		Mendonça et al. 2016
Xenurobrycon	varii	Actinopterygii	Characiformes	Characidae	fusiform	FALSE	1.626	1.32	0.296	0.241	0.147					MPEG 26592		Mendonça et al. 2016
Andinoacara	rivulatus	Actinopterygii	Cichliformes	Cichlidae	compressiform	FALSE	18.33	14.2	4.84								Wild males	Caez et al. 2019
Andinoacara	rivulatus	Actinopterygii	Cichliformes	Cichlidae	compressiform	FALSE	18.31	14.54	4.91								Wild females	Caez et al. 2019
Andinoacara	rivulatus	Actinopterygii	Cichliformes	Cichlidae	compressiform	FALSE	18.37	14.34	4.88		0.64							Gonzalez-Martinez et al. 2021
Cichlasoma	festae	Actinopterygii	Cichliformes	Cichlidae	compressiform	FALSE	18.3	14.37	5.33		0.94							Gonzalez-Martinez et al. 2021
Coptodon	guineensis	Actinopterygii	Cichliformes	Cichlidae	compressiform	FALSE	17.06	13.45	3.43									Olopade et al. 2018
Coptodon	guineensis	Actinopterygii	Cichliformes	Cichlidae	compressiform	FALSE	14.75	11.27	3.37									Olopade et al. 2018
Diplotaxodon	aenus	Actinopterygii	Cichliformes	Cichlidae	fusiform	FALSE	14.9586	12.94	5.09836								Total length estimated from total/standard length ratio in figured specimen	Turner and Stauffer 1998
Diplotaxodon	aenus	Actinopterygii	Cichliformes	Cichlidae	fusiform	FALSE	14.45	12.5	4.68	3.03								Turner and Stauffer 1998
Diplotaxodon	apogon	Actinopterygii	Cichliformes	Cichlidae	fusiform	FALSE	10.7445	9.15	3.4404								Total length estimated from total/standard length ratio in figured specimen	Turner and Stauffer 1998
Diplotaxodon	apogon	Actinopterygii	Cichliformes	Cichlidae	fusiform	FALSE	10.306	8.78	3.248	2.225	1.101							Turner and Stauffer 1998
Diplotaxodon	macrops	Actinopterygii	Cichliformes	Cichlidae	fusiform	FALSE	11.6112	9.45	3.35475								Total length estimated from total/standard length ratio in figured specimen	Turner and Stauffer 1998
Diplotaxodon	macrops	Actinopterygii	Cichliformes	Cichlidae	fusiform	FALSE	14.13	11.5	4.03	2.83								Turner and Stauffer 1998
Hemichromis	camerounensis	Actinopterygii	Cichliformes	Cichlidae	compressiform	FALSE	16.6356	13.68	5.1984								Total length estimated from figured specimen from this population	Nyom et al. 2021
Hemichromis	camerounensis	Actinopterygii	Cichliformes	Cichlidae	compressiform	FALSE	15.757	12.64	4.72736								Total length estimated from figured specimen from this population	Nyom et al. 2021
Hemichromis	camerounensis	Actinopterygii	Cichliformes	Cichlidae	compressiform	FALSE	13.9339	11.44	4.47304								Total length estimated from figured specimen from this population	Nyom et al. 2021
Hemichromis	camerounensis	Actinopterygii	Cichliformes	Cichlidae	compressiform	FALSE	15.76	12.96	4.42	2.84								Nyom et al. 2021
Hemichromis	camerounensis	Actinopterygii	Cichliformes	Cichlidae	compressiform	FALSE	14.28	11.456	4.0314	2.658								Nyom et al. 2021
Hemichromis	camerounensis	Actinopterygii	Cichliformes	Cichlidae	compressiform	FALSE	11.912	9.78	3.449	2.117								Nyom et al. 2021
Hemichromis	fasciatus	Actinopterygii	Cichliformes	Cichlidae	fusiform	FALSE	21.47	16.42	5.4								Females	Ibor et al. 2017
Hemichromis	fasciatus	Actinopterygii	Cichliformes	Cichlidae	fusiform	FALSE	19.16	15.78	4.4								Males	Ibor et al. 2017
Iranocichla	hormuzensis	Actinopterygii	Cichliformes	Cichlidae	fusiform	FALSE	6.353	5.23487	1.95672									Daneshvar et al. 2013
Iranocichla	hormuzensis	Actinopterygii	Cichliformes	Cichlidae	fusiform	FALSE	6.14	5.01638	1.92182									Daneshvar et al. 2013
Sarotherodon	melanotheron	Actinopterygii	Cichliformes	Cichlidae	compressiform	FALSE	21.6	17.01	5.36								Females	Ibor et al. 2017
Sarotherodon	melanotheron	Actinopterygii	Cichliformes	Cichlidae	compressiform	FALSE	19.34	15.34	4.86								Males	Ibor et al. 2017
Alosa	pseudoharengus	Actinopterygii	Clupeiformes	Clupeidae	fusiform	FALSE	12.037	9.99	2.436	1.715	1.192	0.444			juvenile	CMNH 5764a		Present Study
Alosa	pseudoharengus	Actinopterygii	Clupeiformes	Clupeidae	fusiform	FALSE	27	21.5	5.157	3.853	2.604	0.886				CMNH 5764b		Present Study
Alosa	pseudoharengus	Actinopterygii	Clupeiformes	Clupeidae	fusiform	FALSE	23.5	19.6	4.384	3.342	2.246	0.83				CMNH 5764c	caudal rays damaged, total length slight estimate	Present Study
Alosa	pseudoharengus	Actinopterygii	Clupeiformes	Clupeidae	fusiform	FALSE	19.6	16.3	3.913	2.944	1.85	0.72				CMNH 5764d	caudal rays damaged but not totally lost, total length slight estimate	Present Study
Alosa	pseudoharengus	Actinopterygii	Clupeiformes	Clupeidae	fusiform	FALSE	26.5	22.5	4.667	3.29	2.55	0.976				CMNH 5764e	caudal rays damaged but not totally lost, total length slight estimate	Present Study
Alosa	pseudoharengus	Actinopterygii	Clupeiformes	Clupeidae	fusiform	FALSE	26	21	5.01	3.45	2.333	0.999				CMNH 5764f		Present Study
Amblygaster	sirm	Actinopterygii	Clupeiformes	Clupeidae	fusiform	FALSE	21.3	18	4.029	2.749	1.434							Reyes 2017
Amblygaster	sirm	Actinopterygii	Clupeiformes	Clupeidae	fusiform	FALSE	20.3	17.3	4.239	3.046	1.496							Reyes 2017
Amblygaster	sirn	Actinopterygii	Clupeiformes	Clupeidae	fusiform	FALSE	28.175	25.1	5.4969	2.962	1.9829					KAUM-I 151		Hata et al. 2013
Amblygaster	sirn	Actinopterygii	Clupeiformes	Clupeidae	fusiform	FALSE	19.85	17.04	3.97032	2.616	1.3632					KAUM-I 46904		Hata et al. 2013
Anodontostoma	chacunda	Actinopterygii	Clupeiformes	Clupeidae	fusiform	FALSE	20.4	16.4	3.79	2.03	1.15							Randall 1997
Cheirocentrus	dorab	Actinopterygii	Clupeiformes	Cheirocentridae	elongate	FALSE	29.672	25.943	4.019	2.678	2.015					CAS SU 13763a		Monarch 2022
Cheirocentrus	dorab	Actinopterygii	Clupeiformes	Cheirocentridae	elongate	FALSE	31.323	28.359	4.214	2.789	2.208					CAS SU 13763b		Monarch 2022
Cheirocentrus	dorab	Actinopterygii	Clupeiformes	Cheirocentridae	elongate	FALSE	41.5	34.3	6.014	3.868	2.807							Randall 1997
Cheirocentrus	dorab	Actinopterygii	Clupeiformes	Cheirocentridae	elongate	FALSE	33.771	30.887	5.112	3.031	2.705					CAS SU 13609	Tail fin rays cropped	Monarch 2022
Cheirocentrus	dorab	Actinopterygii	Clupeiformes	Cheirocentridae	elongate	FALSE	33.339	29.503	4.793	3.264	2.55					CAS SU 13665		Monarch 2022
Cheirocentrus	nudus	Actinopterygii	Clupeiformes	Cheirocentridae	elongate	FALSE	17.499	14.854	2.918	1.769	1.531					CAS SU 35612		Monarch 2022
Cheirocentrus	nudus	Actinopterygii	Clupeiformes	Cheirocentridae	elongate	FALSE	73	59.2	8.915	5.151	5.681							Randall 1997
Cheirocentrus	nudus	Actinopterygii	Clupeiformes	Cheirocentridae	elongate	FALSE	39.513	34.472	5.536	3.474	2.844					CAS SU 20302		Monarch 2022
Clupea	harengus	Actinopterygii	Clupeiformes	Clupeidae	fusiform	FALSE	28.5	24	5.6	2.967	2.7					MHNUSC25163-1		Bañón et al. 2019b
Clupea	harengus	Actinopterygii	Clupeiformes	Clupeidae	fusiform	FALSE	30	25.5	5.7	3.761	2.5					MHNUSC25163-2		Bañón et al. 2019b
Dorosoma	cepedianum	Actinopterygii	Clupeiformes	Clupeidae	fusiform	FALSE	25.5	20.4	5.124	3.471	1.308	0.903				CMNH 40		Present Study
Dorosoma	cepedianum	Actinopterygii	Clupeiformes	Clupeidae	fusiform	FALSE	28	22.3	5.472	3.883	1.162	0.915				CMNH 5088		Present Study
Dorosoma	cepedianum	Actinopterygii	Clupeiformes	Clupeidae	fusiform	FALSE	23.8	18.8	4.907	3.546	1.281	0.852				CMNH 6388		Present Study
Encrasicholina	punctifer	Actinopterygii	Clupeiformes	Engraulidae	fusiform	FALSE	6.37	5.33	1.3325		0.87412					USNM 177742		Strasberg 1960
Encrasicholina	punctifer	Actinopterygii	Clupeiformes	Engraulidae	fusiform	FALSE	5.95171	4.98	1.27962		0.73206						Total length calculated from standard length using proportions of figured specimen with total length	Strasberg 1960
Encrasicholina	punctifer	Actinopterygii	Clupeiformes	Engraulidae	fusiform	FALSE	6.60902	5.53	1.52008		0.77973						Total length calculated from standard length using proportions of figured specimen with total length	Strasberg 1960
Etrumeus	golanii	Actinopterygii	Clupeiformes	Dussumieriidae	fusiform	FALSE	26.2	22.4	5	3.71329								Mili et al. 2020
Etrumeus	makiawa	Actinopterygii	Clupeiformes	Dussumieriidae	fusiform	FALSE	16.8495	14.1	3.384	2.3	1.2126					BPBM 11486		Randall and Dibattista 2012
Etrumeus	makiawa	Actinopterygii	Clupeiformes	Dussumieriidae	fusiform	FALSE	14.0128	11.6	2.8652		1.0092					FMNH 73706		Randall and Dibattista 2012
Etrumeus	makiawa	Actinopterygii	Clupeiformes	Dussumieriidae	fusiform	FALSE	16.772	14	3.458		1.26					BPBM 41042		Randall and Dibattista 2012
Etrumeus	makiawa	Actinopterygii	Clupeiformes	Dussumieriidae	fusiform	FALSE	21.4347	17.7	4.3188		1.5222					USNM 399263		Randall and Dibattista 2012
Etrumeus	makiawa	Actinopterygii	Clupeiformes	Dussumieriidae	fusiform	FALSE	22.5412	18.8	4.5684	2.88	1.6356					BPBM 40490		Randall and Dibattista 2012
Etrumeus	makiawa	Actinopterygii	Clupeiformes	Dussumieriidae	fusiform	FALSE	22.895	19	4.712		0.361					BPBM 25135		Randall and Dibattista 2012
Lycengraulis	batesii	Actinopterygii	Clupeiformes	Clupeidae	fusiform	FALSE	22.909	18.918	3.805	2.207	3.27							Garcia Júnior et al. 2015
Lycengraulis	poeyi	Actinopterygii	Clupeiformes	Engraulidae	fusiform	FALSE	16.569	14.36	3.069	2.081	1.938					CAS 233697		Monarch 2022
Lycengraulis	poeyi	Actinopterygii	Clupeiformes	Engraulidae	fusiform	FALSE	17.579	14.613	3.441	3.441	2.658					CAS 233699a		Monarch 2022
Thryssa	setirostris	Actinopterygii	Clupeiformes	Engraulidae	fusiform	FALSE	15.4	12.6	2.48		1.37							Khamees et al. 2018
Thryssa	setirostris	Actinopterygii	Clupeiformes	Engraulidae	fusiform	FALSE	11.6	9.5	1.89		1.13							Khamees et al. 2018
Thryssa	setirostris	Actinopterygii	Clupeiformes	Engraulidae	fusiform	FALSE	14.8	12.1	2.53		1.31							Khamees et al. 2018
Thryssa	setirostris	Actinopterygii	Clupeiformes	Engraulidae	fusiform	FALSE	15.2	12.8	2.53		1.35							Khamees et al. 2018
Thryssa	setirostris	Actinopterygii	Clupeiformes	Engraulidae	fusiform	FALSE	15	12.1	2.55		1.6							Khamees et al. 2018
Thryssa	setirostris	Actinopterygii	Clupeiformes	Engraulidae	fusiform	FALSE	15.3	12.4	2.36		1.42							Khamees et al. 2018
Thryssa	setirostris	Actinopterygii	Clupeiformes	Engraulidae	fusiform	FALSE	15.5	12.7	2.55		1.37							Khamees et al. 2018
Thryssa	setirostris	Actinopterygii	Clupeiformes	Engraulidae	fusiform	FALSE	15.4	12.5	2.65		1.29							Khamees et al. 2018
Thryssa	setirostris	Actinopterygii	Clupeiformes	Engraulidae	fusiform	FALSE	16.5	13.2	2.74		1.52							Khamees et al. 2018
Barbodes	banksi	Actinopterygii	Cypriniformes	Cyprinidae	fusiform	FALSE	8.76	6.59	1.794	1.2						CMK 11512		Kottelat and Lim 2021
Barbodes	binotatus	Actinopterygii	Cypriniformes	Cyprinidae	fusiform	FALSE	5.431	4.3	1.117	0.729						CMK 8976		Kottelat and Lim 2021
Barbodes	bunau	Actinopterygii	Cypriniformes	Cyprinidae	fusiform	FALSE	8.602	6.75	1.712	1.178						ZRC 49867		Kottelat and Lim 2021
Barbodes	rhombeus	Actinopterygii	Cypriniformes	Cyprinidae	fusiform	FALSE	10.697	8.39	2.234	1.47						ZRC 40316		Kottelat and Lim 2021
Barbodes	sellifer	Actinopterygii	Cypriniformes	Cyprinidae	fusiform	FALSE	12.533	9.78	2.543	1.702						ZRC 12534		Kottelat and Lim 2021
Barbodes	sellifer	Actinopterygii	Cypriniformes	Cyprinidae	fusiform	FALSE	6.18	4.79	1.183	0.782						ZRC 54462		Kottelat and Lim 2021
Barbodes	sellifer	Actinopterygii	Cypriniformes	Cyprinidae	fusiform	FALSE	5.641	4.27	1.254	0.837						ZRC 1242		Kottelat and Lim 2021
Barbodes	sellifer	Actinopterygii	Cypriniformes	Cyprinidae	fusiform	FALSE	5.438	4.24	1.098	0.753						ZRC 21699		Kottelat and Lim 2021
Barbodes	zakariaismaili	Actinopterygii	Cypriniformes	Cyprinidae	fusiform	FALSE	8.484	6.63	1.736	1.082						ZRC 52347		Kottelat and Lim 2021
Barbodes	zakariaismaili	Actinopterygii	Cypriniformes	Cyprinidae	fusiform	FALSE	7.505	5.83	1.462	0.974						ZRC 62315		Kottelat and Lim 2021
Barbodes	zakariaismaili	Actinopterygii	Cypriniformes	Cyprinidae	fusiform	FALSE	3.62	2.78	0.854	0.599					juvenile	CMK 27384a		Kottelat and Lim 2021
Barbodes	zakariaismaili	Actinopterygii	Cypriniformes	Cyprinidae	fusiform	FALSE	4.371	3.37	0.986	0.66					juvenile	CMK 27384b		Kottelat and Lim 2021
Barbodes	zakariaismaili	Actinopterygii	Cypriniformes	Cyprinidae	fusiform	FALSE	3.957	3.01	0.919	0.623					juvenile	ZRC 63215a		Kottelat and Lim 2021
Barbodes	zakariaismaili	Actinopterygii	Cypriniformes	Cyprinidae	fusiform	FALSE	4.634	3.55	1.045	0.702					juvenile	ZRC 63215b		Kottelat and Lim 2021
Barbus	esocinus	Actinopterygii	Cypriniformes	Cyprinidae	fusiform	FALSE	90.87	79	20.83									Ali and Tomas 2009
Barbus	esocinus	Actinopterygii	Cypriniformes	Cyprinidae	fusiform	FALSE	30	25.8	6.708									Ali and Tomas 2009
Barbus	esocinus	Actinopterygii	Cypriniformes	Cyprinidae	fusiform	FALSE	130	114.6	33.0048									Ali and Tomas 2009
Catla	catla	Actinopterygii	Cypriniformes	Cyprinidae	fusiform	FALSE	54.113	42.508	13.232								Data is a bit suspicious	Balai et al. 2017
Cirrhinus	mrigala	Actinopterygii	Cypriniformes	Cyprinidae	fusiform	FALSE	51.723	41.564	9.802								Data is a bit suspicious	Balai et al. 2017
Crossocheilus	latius	Actinopterygii	Cypriniformes	Cyprinidae	fusiform	FALSE	10.62	8.27	1.89									Brraich and Akhter 2015b
Ctenopharyngodon	idella	Actinopterygii	Cypriniformes	Cyprinidae	fusiform	FALSE	30.98	20.75	6.69574									Khalid and Naeem 2017
Danio	rerio	Actinopterygii	Cypriniformes	Cyprinidae	fusiform	FALSE	3.37	2.6	0.573	0.439	0.22				adult	BMNH 2001.3.12.7692		Britz et al. 2014
Garra	gotyla	Actinopterygii	Cypriniformes	Cyprinidae	fusiform	FALSE	12.08	9.3	2.5									Brraich and Akhter 2015a
Gila	elegans	Actinopterygii	Cypriniformes	Cyprinidae	fusiform	FALSE	45.8	39.774	8.394	5.67	2.955							Kaeding et al. 1986
Hypothalmichthys	molitrix	Actinopterygii	Cypriniformes	Cyprinidae	fusiform	FALSE	36.7	30	8									Rehman et al. 2015
Hypothalmichthys	molitrix	Actinopterygii	Cypriniformes	Cyprinidae	fusiform	FALSE	41.038	33.438	9.2375									Rehman et al. 2015
Hypothalmichthys	molitrix	Actinopterygii	Cypriniformes	Cyprinidae	fusiform	FALSE	45.1	36.843	10.1									Rehman et al. 2015
Hypothalmichthys	molitrix	Actinopterygii	Cypriniformes	Cyprinidae	fusiform	FALSE	45	37.02	9.32	5.94	1.77							Shao and Lim 1991
Hypselobarbus	mussullah	Actinopterygii	Cypriniformes	Cyprinidae	fusiform	FALSE	14.8	11.5	3.3									Hora 1943
Hypselobarbus	mussullah	Actinopterygii	Cypriniformes	Cyprinidae	fusiform	FALSE	27	21.5	5.8									Hora 1943
Hypselobarbus	mussullah	Actinopterygii	Cypriniformes	Cyprinidae	fusiform	FALSE	27.5	22.5	6									Hora 1943
Hypselobarbus	mussullah	Actinopterygii	Cypriniformes	Cyprinidae	fusiform	FALSE	62.2	49.4	12.5									Hora 1943
Hypselobarbus	mussullah	Actinopterygii	Cypriniformes	Cyprinidae	fusiform	FALSE	75	60	14.9									Hora 1943
Labeo	gonius	Actinopterygii	Cypriniformes	Cyprinidae	fusiform	FALSE	23.58	18.84	3.64									Naeem et al. 2017
Labeo	rohita	Actinopterygii	Cypriniformes	Cyprinidae	fusiform	FALSE	51.601	40.702	10.378								Data is a bit suspicious	Balai et al. 2017
Neolissochilus	stracheyi	Actinopterygii	Cypriniformes	Cyprinidae	fusiform	FALSE	30.1	23.8	6.48	4.176	2.15				adult	UNS 00866		Hoang et al. 2015
Neolissochilus	stracheyi	Actinopterygii	Cypriniformes	Cyprinidae	fusiform	FALSE	37.15	28.7	7.07	5.278	2.04				adult	UNS 00948		Hoang et al. 2015
Neolissochilus	stracheyi	Actinopterygii	Cypriniformes	Cyprinidae	fusiform	FALSE	52.07	42.8	11.04	7.339	3.55				adult	UNS 00949		Hoang et al. 2015
Neolissochilus	stracheyi	Actinopterygii	Cypriniformes	Cyprinidae	fusiform	FALSE	64.56	53.4	12.69	8.011	3.51				adult	UNS 00950		Hoang et al. 2015
Paedocypris	micromegethes	Actinopterygii	Cypriniformes	Cyprinidae	fusiform	FALSE	1.249	1.082	0.244	0.18	0.079				adult	BMNH 2008.4.11.2-11ba		Britz and Conway 2009
Paedocypris	micromegethes	Actinopterygii	Cypriniformes	Cyprinidae	fusiform	FALSE	1.0752	0.9623	0.1925	0.1329	0.0721				adult	BMNH 2008.4.11.2-11b		Britz and Conway 2009
Puntius	sarana	Actinopterygii	Cypriniformes	Cyprinidae	fusiform	FALSE	12.81	10.1	2.65		1.13							Hossain et al. 2009
Rutilus	rutilus	Actinopterygii	Cypriniformes	Cyprinidae	fusiform	FALSE	10.7002	8.34	2.24346						juvenile			Talabishka et al. 2015
Rutilus	virgo	Actinopterygii	Cypriniformes	Cyprinidae	fusiform	FALSE	41	34	6.766									Jurajda and Pavlov 2016
Rutilus	virgo	Actinopterygii	Cypriniformes	Cyprinidae	fusiform	FALSE	10.4789	8.31	2.11074						juvenile		Very small, likely juveniles?	Talabishka et al. 2015
Rutilus	virgo	Actinopterygii	Cypriniformes	Cyprinidae	fusiform	FALSE	10.51	10.51	2.57495		0.615413				juvenile		Very small, likely juveniles?	Talabishka et al. 2015
Rutilus	virgo	Actinopterygii	Cypriniformes	Cyprinidae	fusiform	FALSE	30.01	28.64	5.8712		1.3445							Talabishka et al. 2015
Schizothorax	esocinus	Actinopterygii	Cypriniformes	Cyprinidae	fusiform	FALSE	23.85	20.3792	5.44969									Bhat et al. 2010
Schizothorax	labiatus	Actinopterygii	Cypriniformes	Cyprinidae	fusiform	FALSE	17.35	14.4834	3.31091									Bhat et al. 2010
Schizothorax	plagiostomus	Actinopterygii	Cypriniformes	Cyprinidae	fusiform	FALSE	30.8	25.8737	5.23714									Bhat et al. 2010
Tor	dongnaiensis	Actinopterygii	Cypriniformes	Cyprinidae	fusiform	FALSE	31.23	24	5.71	4.21	1.91	1.46			adult	UNS 00859	holotype	Hoang et al. 2015
Tor	khudree	Actinopterygii	Cypriniformes	Cyprinidae	fusiform	FALSE	30	23.3	6.15									Hora 1943
Tor	khudree	Actinopterygii	Cypriniformes	Cyprinidae	fusiform	FALSE	32.6	25.6	6.7									Hora 1943
Tor	khudree	Actinopterygii	Cypriniformes	Cyprinidae	fusiform	FALSE	12.5	9.8	2.6									Hora 1943
Tor	khudree	Actinopterygii	Cypriniformes	Cyprinidae	fusiform	FALSE	22.5	17.9	4.7									Hora 1943
Tor	mekongensis	Actinopterygii	Cypriniformes	Cyprinidae	fusiform	FALSE	43.57	33.7	7.81	5.27	2.51	2.02			adult	UNS 00877	holotype	Hoang et al. 2015
Tor	tor	Actinopterygii	Cypriniformes	Cyprinidae	fusiform	FALSE	46.3132	35	9.16656			3.4229						Dasgupta 1990
Fundulus	diaphanus	Actinopterygii	Cyprinodontiformes	Fundulidae	fusiform	FALSE	6.72	5.804	1.407	0.923	0.208	0.424				CMNH 18620a		Present Study
Fundulus	diaphanus	Actinopterygii	Cyprinodontiformes	Fundulidae	fusiform	FALSE	7.736	6.557	1.526	1.116	0.29	0.522				CMNH 18620b		Present Study
Fundulus	diaphanus	Actinopterygii	Cyprinodontiformes	Fundulidae	fusiform	FALSE	7.1	6.177	1.49	1.008	0.361	0.498				CMNH 18620c		Present Study
Fundulus	diaphanus	Actinopterygii	Cyprinodontiformes	Fundulidae	fusiform	FALSE	8.157	7.058	1.71	1.268	0.518	0.634				CMNH 18620d		Present Study
Fundulus	diaphanus	Actinopterygii	Cyprinodontiformes	Fundulidae	fusiform	FALSE	7.58	6.513	1.651	1.022	0.349	0.536				CMNH 18620e		Present Study
Fundulus	diaphanus	Actinopterygii	Cyprinodontiformes	Fundulidae	fusiform	FALSE	7.651	6.525	1.636	1.133	0.47	0.6				CMNH 18620f		Present Study
Fundulus	diaphanus	Actinopterygii	Cyprinodontiformes	Fundulidae	fusiform	FALSE	8.094	6.94	1.666	1.118	0.46	0.579				CMNH 18620g		Present Study
Elops	machnata	Actinopterygii	Elopiformes	Elopidae	fusiform	FALSE	32	25.15	5.44	3.23	2.74						Uploaded to FishBase at https://fishbase.de/photos/UploadedBy.php?autoctr=17998&win=uploaded	Osmany pers. comm. (FishBase)
Elops	machnata	Actinopterygii	Elopiformes	Elopidae	fusiform	FALSE	42	33.12	7.78	4.47	3.89						Uploaded to FishBase at https://fishbase.net.br/photos/UploadedBy.php?autoctr=18462&win=uploaded	Osmany pers. comm. (FishBase)
Elops	saurus	Actinopterygii	Elopiformes	Elopidae	fusiform	FALSE	56.9	45.1	11.94							UF 47036		McBride et al. 2010
Elops	saurus	Actinopterygii	Elopiformes	Elopidae	fusiform	FALSE	29.4	22.4	6.04							FSBC 10270		McBride et al. 2010
Elops	saurus	Actinopterygii	Elopiformes	Elopidae	fusiform	FALSE	30.1	24.2	6.3							GCRL 1938		McBride et al. 2010
Elops	saurus	Actinopterygii	Elopiformes	Elopidae	fusiform	FALSE	33.1	25.8	6.65							GCRL 345		McBride et al. 2010
Elops	saurus	Actinopterygii	Elopiformes	Elopidae	fusiform	FALSE	29.2	22.6	6.34							UF 105715		McBride et al. 2010
Elops	saurus	Actinopterygii	Elopiformes	Elopidae	fusiform	FALSE	25.7	20.1	5.63							UF 105715		McBride et al. 2010
Elops	saurus	Actinopterygii	Elopiformes	Elopidae	fusiform	FALSE	30.1	23.2	6.13							FSBC 258		McBride et al. 2010
Elops	saurus	Actinopterygii	Elopiformes	Elopidae	fusiform	FALSE	33.3	25.7	6.98							FSBC 12589		McBride et al. 2010
Elops	saurus	Actinopterygii	Elopiformes	Elopidae	fusiform	FALSE	33.5	27.5	7.39							FSBC 12589		McBride et al. 2010
Elops	saurus	Actinopterygii	Elopiformes	Elopidae	fusiform	FALSE	34.4	26.7	7.27							FSBC 12589		McBride et al. 2010
Elops	smithi	Actinopterygii	Elopiformes	Elopidae	fusiform	FALSE	63	50	12.9	8.347	7.656					UNPSJB ICT-2019/03		Bovcon et al. 2022
Elops	smithi	Actinopterygii	Elopiformes	Elopidae	fusiform	FALSE	65	54.5	13.1	8.621	8.067					CNPICT-2013/45		Bovcon et al. 2022
Elops	smithi	Actinopterygii	Elopiformes	Elopidae	fusiform	FALSE	38.8	30.3	8.04	4.98	4.27					UF 45683		McBride et al. 2010
Elops	smithi	Actinopterygii	Elopiformes	Elopidae	fusiform	FALSE	60.4	50.4	12.74							UF 45682		McBride et al. 2010
Elops	smithi	Actinopterygii	Elopiformes	Elopidae	fusiform	FALSE	52.8	42.4	12.02							UF 11269		McBride et al. 2010
Elops	smithi	Actinopterygii	Elopiformes	Elopidae	fusiform	FALSE	46.9	36.2	9.62							UF 11269		McBride et al. 2010
Elops	smithi	Actinopterygii	Elopiformes	Elopidae	fusiform	FALSE	56.8	44	11.48							GCRL 11273		McBride et al. 2010
Elops	smithi	Actinopterygii	Elopiformes	Elopidae	fusiform	FALSE	26.4	20.4	5.72							GCRL 11950		McBride et al. 2010
Elops	smithi	Actinopterygii	Elopiformes	Elopidae	fusiform	FALSE	20.7	16	4.56							GCRL 11950		McBride et al. 2010
Elops	smithi	Actinopterygii	Elopiformes	Elopidae	fusiform	FALSE	22	17.1	4.82							GCRL 11950		McBride et al. 2010
Elops	smithi	Actinopterygii	Elopiformes	Elopidae	fusiform	FALSE	22.2	17.2	4.82							GCRL 11950		McBride et al. 2010
Megalops	atlanticus	Actinopterygii	Elopiformes	Megalopidae	fusiform	FALSE	174	153.5	34	19.28	17.42				subadult			Arronte et al. 2004
Megalops	atlanticus	Actinopterygii	Elopiformes	Megalopidae	fusiform	FALSE	185.5	155	34.1	20.4	22	8						Bañón et al. 2019a
Megalops	atlanticus	Actinopterygii	Elopiformes	Megalopidae	fusiform	FALSE	164	145	34	21.859	16.731							Twomey and Byrne 1985
Megalops	atlanticus	Actinopterygii	Elopiformes	Megalopidae	fusiform	FALSE	212	173	39									Roux 1960
Megalops	atlanticus	Actinopterygii	Elopiformes	Megalopidae	fusiform	FALSE	205	165	37.3									Roux 1960
Megalops	atlanticus	Actinopterygii	Elopiformes	Megalopidae	fusiform	FALSE	192	154	35									Roux 1960
Megalops	atlanticus	Actinopterygii	Elopiformes	Megalopidae	fusiform	FALSE	184	148	34									Roux 1960
Megalops	atlanticus	Actinopterygii	Elopiformes	Megalopidae	fusiform	FALSE	167	138	31									Roux 1960
Megalops	atlanticus	Actinopterygii	Elopiformes	Megalopidae	fusiform	FALSE	163	134	30									Roux 1960
Megalops	atlanticus	Actinopterygii	Elopiformes	Megalopidae	fusiform	FALSE	162.5	128	32.5									Roux 1960
Megalops	atlanticus	Actinopterygii	Elopiformes	Megalopidae	fusiform	FALSE	152	122	28.5									Roux 1960
Megalops	cyprinoides	Actinopterygii	Elopiformes	Megalopidae	fusiform	FALSE	32.4	24.4	5.818	4.216	3.423							Randall 1997
Megalops	cyprinoides	Actinopterygii	Elopiformes	Megalopidae	fusiform	FALSE	43.3	34.3	8.611	6.289	5.301							Randall 1997
Megalops	cyprinoides	Actinopterygii	Elopiformes	Megalopidae	fusiform	FALSE	50.7	44.7	10.4151	6.11	6.3921						Estimated from picture, caudal rays damaged a bit	Dolganov et al. 2008
Esox	aquitanicus	Actinopterygii	Esociformes	Esocidae	fusiform	FALSE	42.53	37.2	10.02	7.33	4.24					MNHN 2013-1246		Denys et al. 2014
Esox	lucius	Actinopterygii	Esociformes	Esocidae	elongate	FALSE	87.6	78.7924	22.17	17.179								Casselman et al. 1986
Esox	lucius	Actinopterygii	Esociformes	Esocidae	elongate	FALSE	82.5	74.3	18	12.425		5.434				OSUM pike		Present Study
Esox	masquinongy	Actinopterygii	Esociformes	Esocidae	elongate	FALSE	82.57	73.6	18.726	14.37								Casselman et al. 1986
Esox	masquinongy	Actinopterygii	Esociformes	Esocidae	elongate	FALSE	91.739	81.82	20.319	16.106								Casselman et al. 1986
Esox	masquinongy	Actinopterygii	Esociformes	Esocidae	elongate	FALSE	78.68	69.272	17.686	13.633								Casselman et al. 1986
Esox	masquinongy	Actinopterygii	Esociformes	Esocidae	elongate	FALSE	87.1417	77.4	19.7	14.305	9.205	6.046				OSUM 9276	Caudal fin rays damaged, total length estimated from total length/fork length ratio in other specimens in study	Present Study
Esox	masquinongy	Actinopterygii	Esociformes	Esocidae	elongate	FALSE	66.3	59.3	15.09	11.433	8.43	5.246				OSUM 42103		Present Study
Esox	masquinongy	Actinopterygii	Esociformes	Esocidae	elongate	FALSE	66.3	58.3	16.513	12.148	8.47	6.701				OSUM 5031		Present Study
Esox	niger	Actinopterygii	Esociformes	Esocidae	elongate	FALSE	43.9	39.5	9.393	7.18	4.357	3.473				CMNH 10030	Neurocranium seems to extend anteriorly to 59 mm	Present Study
Esox	niger	Actinopterygii	Esociformes	Esocidae	elongate	FALSE	49	43	11.433	8.773	5.637	3.683				CMNH 2304	girth could not be measured due to preparation	Present Study
Umbra	limi	Actinopterygii	Esociformes	Umbridae	fusiform	FALSE	9.728	8.306	2.429	1.403	0.677	1.042				CMNH 10908a		Present Study
Umbra	limi	Actinopterygii	Esociformes	Umbridae	fusiform	FALSE	8.66	7.259	2.017	1.218	0.622	0.766				CMNH 10908b		Present Study
Umbra	limi	Actinopterygii	Esociformes	Umbridae	fusiform	FALSE	8.918	7.317	2.19	1.334	0.755	0.766				CMNH 10908c		Present Study
Umbra	limi	Actinopterygii	Esociformes	Umbridae	fusiform	FALSE	6.354	5.405	1.682	1.111	0.494	0.445				CMNH 10908d		Present Study
Umbra	limi	Actinopterygii	Esociformes	Umbridae	fusiform	FALSE	10.255	8.577	2.652	1.464	0.863	1.053				CMNH 10908e		Present Study
Umbra	limi	Actinopterygii	Esociformes	Umbridae	fusiform	FALSE	7.905	6.648	1.937	1.267	0.627	0.602				CMNH 10908f		Present Study
Umbra	limi	Actinopterygii	Esociformes	Umbridae	fusiform	FALSE	6.21	5.158	1.483	0.873	0.456	0.39				CMNH 10908g		Present Study
Umbra	limi	Actinopterygii	Esociformes	Umbridae	fusiform	FALSE	7.912	6.496	2.067	1.318	0.687	0.681				CMNH 10908h		Present Study
Umbra	limi	Actinopterygii	Esociformes	Umbridae	fusiform	FALSE	7.398	6.27	1.8	1.146	0.461	0.658				CMNH 10908i		Present Study
Umbra	limi	Actinopterygii	Esociformes	Umbridae	fusiform	FALSE	7.851	6.497	1.917	1.168	0.567	0.715				CMNH 10908j		Present Study
Umbra	limi	Actinopterygii	Esociformes	Umbridae	fusiform	FALSE	6.635	5.65	1.625	1.07	0.432	0.498				CMNH 10908k		Present Study
Umbra	limi	Actinopterygii	Esociformes	Umbridae	fusiform	FALSE	8.361	7.311	2.016	1.234	0.595	0.66				CMNH 10908l		Present Study
Umbra	limi	Actinopterygii	Esociformes	Umbridae	fusiform	FALSE	7.389	6.342	1.777	1.207	0.552	0.648				CMNH 10908m		Present Study
Acanthopagrus	berda	Actinopterygii	Eupercaria incertae sedis	Sparidae	compressiform	FALSE	43.5	36.7	11.75	7.77	3.92							Randall 1997
Acanthopagrus	berda	Actinopterygii	Eupercaria incertae sedis	Sparidae	compressiform	FALSE	41	32.8	10.06	7.06	3.59							Randall 1997
Acanthopagrus	berda	Actinopterygii	Eupercaria incertae sedis	Sparidae	compressiform	FALSE	37.2	30.7	9.1	6.36	3.37							Randall 1997
Argyrosomus	heinii	Actinopterygii	Eupercaria incertae sedis	Sciaenidae	fusiform	FALSE	59.2	50.2	14.638	10.07	6.491							Randall 1997
Argyrosomus	heinii	Actinopterygii	Eupercaria incertae sedis	Sciaenidae	fusiform	FALSE	23.7	19.9	5.869	3.558	2.419							Randall 1997
Argyrosomus	japonicus	Actinopterygii	Eupercaria incertae sedis	Sciaenidae	fusiform	FALSE	94	82	23.3								Recorded as "Sciaena antarctica rex"	Whitley 1947
Argyrosomus	japonicus	Actinopterygii	Eupercaria incertae sedis	Sciaenidae	fusiform	FALSE	107.5	93	26.5		9.207						Recorded as "Sciaena antarctica rex"	Whitley 1947
Argyrosomus	regius	Actinopterygii	Eupercaria incertae sedis	Sciaenidae	fusiform	FALSE	131	118.5	28.784	17.315							Could only take measurements along anteroposterior axis as photo was in oblique lateral view	Tokaç et al. 2017
Atrobucca	nibe	Actinopterygii	Eupercaria incertae sedis	Sciaenidae	fusiform	FALSE	34.6	26.7	8.64	5.28	3.99							Randall 1997
Bodianus	albotaeniatus	Actinopterygii	Eupercaria incertae sedis	Labridae	fusiform	FALSE	41.35	32	10.25	6.81	3.8							Randall 1997
Bodianus	unimaculatus	Actinopterygii	Eupercaria incertae sedis	Labridae	fusiform	FALSE	17.356	13.565	4.545	3.224	1.586						Accessed at https://www.fishbase.se/photos/PicturesSummary.php?StartRow=1&ID=27512&what=species&TotRec=4, higher resolution version on iNaturalist	Duffy pers. comm. (FishBase)
Bodianus	unimaculatus	Actinopterygii	Eupercaria incertae sedis	Labridae	fusiform	FALSE	35.18	28.5	10.34	7.52	3.61							Randall 1997
Caesio	caerulaurea	Actinopterygii	Eupercaria incertae sedis	Caesionidae	fusiform	FALSE	26.7	20.8	4.821	3.602	1.763							Randall 1997
Cynoscion	nebulosus	Actinopterygii	Eupercaria incertae sedis	Sciaenidae	fusiform	FALSE	76.9	63	19.93	12.705	6.993	5.743				FSBC 6712		Present Study
Diplodus	cervinus	Actinopterygii	Eupercaria incertae sedis	Sparidae	compressiform	FALSE	28.4	22.6	6.34	4.63	1.93							Randall 1997
Diplodus	cervinus	Actinopterygii	Eupercaria incertae sedis	Sparidae	compressiform	FALSE	32.7	25.8	8.22	6	2.05							Randall 1997
Johnieops	sina	Actinopterygii	Eupercaria incertae sedis	Sciaenidae	fusiform	FALSE	15.528	12.565	3.786									Kumar et al. 2012
Lethrinus	erythracanthus	Actinopterygii	Eupercaria incertae sedis	Lethrinidae	fusiform	FALSE	41.4	34.5	12.17	10.26	5.5							Randall 1997
Lobotes	surinamensis	Actinopterygii	Eupercaria incertae sedis	Lobotidae	compressiform	FALSE	43	33	12	6.789	3.74					FSB-Lob-sur-01		Soufi-Kechaou et al. 2018
Lobotes	surinamensis	Actinopterygii	Eupercaria incertae sedis	Lobotidae	compressiform	FALSE	37.9	33.5	10.4225	6.443	3.5247							Daban and Kabbar 2021
Lobotes	surinamensis	Actinopterygii	Eupercaria incertae sedis	Lobotidae	compressiform	FALSE	54.7	41.5	15.5	8.64	4.58	3.826				FSBC 10817		Present Study
Lopholatilus	chamaeleonticeps	Actinopterygii	Eupercaria incertae sedis	Malacanthidae	fusiform	FALSE	84.2	69.2	23	15.3	10.5					USNM 22899		Goode and Bean 1878b
Malacanthus	plumieri	Actinopterygii	Eupercaria incertae sedis	Malacanthidae	elongate	FALSE	55.5	47	12.9	9.09	4.45	3.055				FSBC 7987		Present Study
Malacanthus	plumieri	Actinopterygii	Eupercaria incertae sedis	Malacanthidae	elongate	FALSE	61.2	52.5	14.071	8.584	3.874	3.222				FSBC 7683		Present Study
Malacanthus	plumieri	Actinopterygii	Eupercaria incertae sedis	Malacanthidae	elongate	FALSE	63	52	13.098	9.118	4.036	4.429				FSBC 7207		Present Study
Morone	saxatilus	Actinopterygii	Eupercaria incertae sedis	Moronidae	fusiform	FALSE	59.14	46.46	14.143	11.83	6.14	4.46				FSBC 33946		Present Study
Nemipterus	japonicus	Actinopterygii	Eupercaria incertae sedis	Nemipteridae	fusiform	FALSE	23.24	18.8	5.48	3.9	1.54						Total length measured minus filamentous extension of dorsal fin	Randall 1997
Nemipterus	japonicus	Actinopterygii	Eupercaria incertae sedis	Nemipteridae	fusiform	FALSE	22.192	18	5.339	3.493	1.58						Total length measured minus filamentous extension of dorsal fin	Randall 1997
Nemipterus	japonicus	Actinopterygii	Eupercaria incertae sedis	Nemipteridae	fusiform	FALSE	23.131	18.6	5.662	3.794	1.863						Total length measured minus filamentous extension of dorsal fin	Randall 1997
Nemipterus	japonicus	Actinopterygii	Eupercaria incertae sedis	Nemipteridae	fusiform	FALSE	23.104	18.5	5.232	3.606	1.578						Total length measured minus filamentous extension of dorsal fin	Randall 1997
Nemipterus	nemurus	Actinopterygii	Eupercaria incertae sedis	Nemipteridae	fusiform	FALSE	21.53	17.4	4.47	3.34	1.66						Total length measured minus filamentous extension of dorsal fin	Randall 1997
Nemipterus	virgatus	Actinopterygii	Eupercaria incertae sedis	Nemipteridae	fusiform	FALSE	18.8	15	3.79	2.77	1.42						Total length measured minus filamentous extension of dorsal fin	Randall 1997
Pachyurus	bonairensis	Actinopterygii	Eupercaria incertae sedis	Sciaenidae	fusiform	FALSE	24.346	20.98	4.717	2.84								Harayashiki et al. 2014
Pentapodus	caninus	Actinopterygii	Eupercaria incertae sedis	Nemipteridae	fusiform	FALSE	20.3	15.5	4.12	2.97	1.19					Pecan u2		Randall 1997
Pentapodus	caninus	Actinopterygii	Eupercaria incertae sedis	Nemipteridae	fusiform	FALSE	18.2	13.5	3.73	2.57	0.92					Pecan u4		Randall 1997
Pentapodus	caninus	Actinopterygii	Eupercaria incertae sedis	Nemipteridae	fusiform	FALSE	22.7	16.8	4.36	3.14	1.29					Pecan u5		Randall 1997
Pentapodus	caninus	Actinopterygii	Eupercaria incertae sedis	Nemipteridae	fusiform	FALSE	25.7	18.3	4.54	3.33	1.44					Pecan u8		Randall 1997
Pogonias	cromis	Actinopterygii	Eupercaria incertae sedis	Sciaenidae	fusiform	FALSE	81	66.5	20.4	14.81	6.92	8.722				FSBC 6411		Present Study
Sciaena	umbra	Actinopterygii	Eupercaria incertae sedis	Sciaenidae	fusiform	FALSE	41.7	34.6	9.83	5.95	2.92							Cengiz et al. 2019
Sciaena	umbra	Actinopterygii	Eupercaria incertae sedis	Sciaenidae	fusiform	FALSE	35.78	30.61	9.28									Aydin and Bodur 2021
Scolopsis	bilineatus	Actinopterygii	Eupercaria incertae sedis	Nemipteridae	fusiform	FALSE	14	11.1	3.36	2.612	0.786							Randall 1997
Scolopsis	bilineatus	Actinopterygii	Eupercaria incertae sedis	Nemipteridae	fusiform	FALSE	18.3	14.6	4.027	2.806	1.135							Randall 1997
Scolopsis	taenioptera	Actinopterygii	Eupercaria incertae sedis	Nemipteridae	fusiform	FALSE	16.7	13	3.922	3.018	1.204							Randall 1997
Scolopsis	taenioptera	Actinopterygii	Eupercaria incertae sedis	Nemipteridae	fusiform	FALSE	13.9	11.2	3.186	2.363	1.065							Randall 1997
Scolopsis	taenioptera	Actinopterygii	Eupercaria incertae sedis	Nemipteridae	fusiform	FALSE	16.5	12.9	3.88	2.804	1.323							Randall 1997
Scolopsis	taenioptera	Actinopterygii	Eupercaria incertae sedis	Nemipteridae	fusiform	FALSE	23.1	18.1	5.176	3.439	1.911							Randall 1997
Scolopsis	taenioptera	Actinopterygii	Eupercaria incertae sedis	Nemipteridae	fusiform	FALSE	16.3	13.1	3.853	2.964	1.37							Randall 1997
Sillaginopsis	panijus	Actinopterygii	Eupercaria incertae sedis	Sillaginidae	fusiform	FALSE	22.509	18.946	5.765		1.064	0.906						Pradhan et al. 2020
Sillago	sihama	Actinopterygii	Eupercaria incertae sedis	Sillaginidae	fusiform	FALSE	17.2	14.9	3.998	3.01	0.952					u2		Randall 1997
Sillago	sihama	Actinopterygii	Eupercaria incertae sedis	Sillaginidae	fusiform	FALSE	17.9	15.5	4.297	2.985	1.229					u3		Randall 1997
Sillago	sihama	Actinopterygii	Eupercaria incertae sedis	Sillaginidae	fusiform	FALSE	18.6	16.4	4.258	3.113	1.398					u4		Randall 1997
Sillago	sihama	Actinopterygii	Eupercaria incertae sedis	Sillaginidae	fusiform	FALSE	20.5	17.9	5.024	3.916	1.417					u5		Randall 1997
Sillago	sihama	Actinopterygii	Eupercaria incertae sedis	Sillaginidae	fusiform	FALSE	21	18.7	4.976	3.448	1.47					u6		Randall 1997
Sillago	sihama	Actinopterygii	Eupercaria incertae sedis	Sillaginidae	fusiform	FALSE	20.3	17.7	4.397	3.206	1.227					u7		Randall 1997
Sillago	sihama	Actinopterygii	Eupercaria incertae sedis	Sillaginidae	fusiform	FALSE	24.4	21.8	5.93	4.139	2.098					u8		Randall 1997
Sillago	suezensis	Actinopterygii	Eupercaria incertae sedis	Sillaginidae	fusiform	FALSE	14.03	11.7375	3.11606									Innal et al. 2015
Umbrina	cirrosa	Actinopterygii	Eupercaria incertae sedis	Sciaenidae	fusiform	FALSE	68.8	61.1	12.41	7.2	2.91							Cengiz and Parug 2021
Bregmaceros	nectabanus	Actinopterygii	Gadiformes	Bregmacerotidae	fusiform	FALSE	7.93	7.2	1.16	0.62	0.6					SMF 34987		Bogorodsky et al. 2014
Coelorinchus	caelorhincus	Actinopterygii	Gadiformes	Macrouridae	macruriform	FALSE	19.7		4.9		1.4					2266M.S.L		Ali et al. 2016
Coelorinchus	caelorhincus	Actinopterygii	Gadiformes	Macrouridae	macruriform	FALSE	21		4.8		1.6					2267M.S.L		Ali et al. 2016
Enchelyopus	cimbrius	Actinopterygii	Gadiformes	Gadidae	anguilliform	FALSE	35.05	29.2	6.2488	4.02815	3.39935							Machida 1991
Gaidropsarus	granti	Actinopterygii	Gadiformes	Lotidae	elongate	FALSE	31.9	28	5.79	4.39	3.08					DSZ-03/07		Pais et al. 2008
Mora	moro	Actinopterygii	Gadiformes	Moridae	fusiform	FALSE	35.8176	32.2	7.4543								Total length estimated from reported standard length using proportions of specimens on FishBase	Bilecenoglu et al. 2002
Muraenolepis	marmorata	Actinopterygii	Gadiformes	Muraenolepididae	macruriform	FALSE	34.02		5.815		2.099				adult			Duhamel et al. 2017
Physiculus	dalwigki	Actinopterygii	Gadiformes	Moridae	fusiform	FALSE	24.4	21.1	4.8	2.79	1.5					IFAN Phy-dal-01		Diatta et al. 2021
Physiculus	dalwigki	Actinopterygii	Gadiformes	Moridae	fusiform	FALSE	30.2	26.1	6	2.962	2.2					IFAN Phy-dal-02		Diatta et al. 2021
Theragra	chalcogramma	Actinopterygii	Gadiformes	Gadidae	fusiform	FALSE	60.5	55.5	14.391									Privalikhin and Norvillo 2010
Galaxias	eldoni	Actinopterygii	Galaxiiformes	Galaxiidae	fusiform	FALSE	8.97	7.679	1.472	0.978	0.579					NMNZ P.033177	Holotype of G. eldoni. Reported as having total length of 7.2 cm, but this does not agree with scale bar on photo	Te Papa Museum 2022a
Amblygobius	phalaena	Actinopterygii	Gobiiformes	Gobiidae	fusiform	FALSE	12.7	9.8	2.44	1.65	0.96					BPBM 12997		Randall 1997
Amblygobius	phalaena	Actinopterygii	Gobiiformes	Gobiidae	fusiform	FALSE	11	8.5	2.19	1.56	0.74							Randall 1997
Gobiomorus	dormitor	Actinopterygii	Gobiiformes	Eleotridae	fusiform	FALSE	54.7	47.7	13.374	7.14	3.93	6.275				FSBC 7519		Present Study
Gobius	cobitis	Actinopterygii	Gobiiformes	Gobiidae	fusiform	FALSE	16.7	12.8	3.3									Ragheb and Rizkalla et al. 2020
Neogobius	melanostomus	Actinopterygii	Gobiiformes	Gobiidae	fusiform	FALSE	4.333	3.484	1.028	0.744	0.263	0.3			juvenile	CMNH 10031a		Present Study
Neogobius	melanostomus	Actinopterygii	Gobiiformes	Gobiidae	fusiform	FALSE	15.5	12.665	4.01	2.903	1.22	1.877				CMNH 10031b		Present Study
Neogobius	melanostomus	Actinopterygii	Gobiiformes	Gobiidae	fusiform	FALSE	14.565	12.436	3.708	2.82	1.285	1.848				CMNH 10031c		Present Study
Neogobius	melanostomus	Actinopterygii	Gobiiformes	Gobiidae	fusiform	FALSE	6.708	5.406	1.553	1.121	0.496	0.596			juvenile	CMNH 10031d		Present Study
Neogobius	melanostomus	Actinopterygii	Gobiiformes	Gobiidae	fusiform	FALSE	13.255	10.881	3.367	2.246	1.221	1.569				CMNH 10031e		Present Study
Neogobius	melanostomus	Actinopterygii	Gobiiformes	Gobiidae	fusiform	FALSE	15.36	12.385	3.734	2.693	1.549	2.056				CMNH 10031f		Present Study
Neogobius	melanostomus	Actinopterygii	Gobiiformes	Gobiidae	fusiform	FALSE	15.7	12.845	3.795	2.9	1.909	2.312				CMNH 10031g		Present Study
Neogobius	melanostomus	Actinopterygii	Gobiiformes	Gobiidae	fusiform	FALSE	9.15	7.409	2.266	1.604	0.879	0.938			juvenile	CMNH 10031h		Present Study
Neogobius	melanostomus	Actinopterygii	Gobiiformes	Gobiidae	fusiform	FALSE	5.852	4.785	1.464	1.065	0.557	0.587			juvenile	CMNH 10031i		Present Study
Neogobius	melanostomus	Actinopterygii	Gobiiformes	Gobiidae	fusiform	FALSE	5.573	4.48	1.364	0.918	0.441	0.567			juvenile	CMNH 10031j		Present Study
Neogobius	melanostomus	Actinopterygii	Gobiiformes	Gobiidae	fusiform	FALSE	13.844	11.354	3.514	2.296	1.229	1.749				CMNH 10031k		Present Study
Neogobius	melanostomus	Actinopterygii	Gobiiformes	Gobiidae	fusiform	FALSE	7.432	6.064	1.833	1.34	0.657	0.628			juvenile	CMNH 10031l		Present Study
Neogobius	melanostomus	Actinopterygii	Gobiiformes	Gobiidae	fusiform	FALSE	14.187	11.562	3.419	2.536	1.127	1.631				CMNH 10031m		Present Study
Neogobius	melanostomus	Actinopterygii	Gobiiformes	Gobiidae	fusiform	FALSE	11.256	9.13	2.707	2.081	1.065	1.108			juvenile	CMNH 10031n		Present Study
Neogobius	melanostomus	Actinopterygii	Gobiiformes	Gobiidae	fusiform	FALSE	6.541	5.353	1.67	1.171	0.464	0.659			juvenile	CMNH 10031o		Present Study
Odondebuenia	balearica	Actinopterygii	Gobiiformes	Gobiidae	fusiform	FALSE	2.865	2.317	0.671	0.556	0.294					IC-MBP 015		Trkov and Lipej 2020
Odondebuenia	balearica	Actinopterygii	Gobiiformes	Gobiidae	fusiform	FALSE	2.851	2.269	0.661	0.502	0.286					IC-MBP 029		Trkov and Lipej 2020
Psammogobius	biocellatus	Actinopterygii	Gobiiformes	Gobiidae	fusiform	FALSE	7.6	6	1.742	1.266	0.681							Randall 1997
Psammogobius	biocellatus	Actinopterygii	Gobiiformes	Gobiidae	fusiform	FALSE	5.5	4.4	1.417	0.911	0.556							Randall 1997
Chanos	chanos	Actinopterygii	Gonorynchiformes	Chanidae	fusiform	FALSE	117.24	92.149	19.0224									Gandhi et al. 1986
Gonorynchus	forsteri	Actinopterygii	Gonorynchiformes	Gonorynchidae	elongate	FALSE	50.88	46.3	7.95	6.01					adult	MNHN 1997-727		Roberts and Grande 1997
Gonorynchus	forsteri	Actinopterygii	Gonorynchiformes	Gonorynchidae	elongate	FALSE	42.87	38.9	6.66	4.4					adult	MNHN 1997-728		Roberts and Grande 1997
Gonorynchus	forsteri	Actinopterygii	Gonorynchiformes	Gonorynchidae	elongate	FALSE	47.05	43	8.23	5.74					adult	NMNZ P.33703		Roberts and Grande 1997
Gonorynchus	forsteri	Actinopterygii	Gonorynchiformes	Gonorynchidae	elongate	FALSE	54.43	48.9	7.74	4.85					adult	NMNZ P.033020		Te Papa Museum 2022b
Electrophorus	varii	Actinopterygii	Gymnotiformes	Gymnotidae	anguilliform	FALSE	100		11.2		3.472	5.5552				MPEG 25422		de Santana et al. 2019
Electrophorus	voltai	Actinopterygii	Gymnotiformes	Gymnotidae	anguilliform	FALSE	129.8		11.4873		2.5311	4.48695						de Santana et al. 2019
Gymnotus	chaviro	Actinopterygii	Gymnotiformes	Gymnotidae	anguilliform	FALSE	23.3		2.353							MUSM 33715		Maxime and Albert 2009
Gymnotus	chaviro	Actinopterygii	Gymnotiformes	Gymnotidae	anguilliform	FALSE	15		2.67							MUSM 33714		Maxime and Albert 2009
Gymnotus	omarorum	Actinopterygii	Gymnotiformes	Gymnoidae	anguilliform	FALSE	25.4		2.83			1.3584				ZVC-P 6480		Richer-de-Forges et al. 2009
Hiodon	tergisus	Actinopterygii	Hiodontiformes	Hiodontidae	fusiform	FALSE	26.2	21.8	5.063	3.562	2.055	1.078				CMNH 35a		Present Study
Hiodon	tergisus	Actinopterygii	Hiodontiformes	Hiodontidae	fusiform	FALSE	21.8	18.7	4.366	2.965	1.613	0.936				CMNH 35b		Present Study
Hiodon	tergisus	Actinopterygii	Hiodontiformes	Hiodontidae	fusiform	FALSE	25.7	22.5	4.744	3.481	1.944	1.073				CMNH 35c		Present Study
Hiodon	tergisus	Actinopterygii	Hiodontiformes	Hiodontidae	fusiform	FALSE	12.9	10.65	2.732	1.863	1.222	0.68			juvenile	CMNH 3993a		Present Study
Hiodon	tergisus	Actinopterygii	Hiodontiformes	Hiodontidae	fusiform	FALSE	27	22.6	5.369	3.945	2.089	1.388			adult	CMNH 3993b		Present Study
Neoniphon	aurolineatus	Actinopterygii	Holocentriformes	Holocentridae	fusiform	FALSE	18.3	15.2	5.15803	3.60481	2.2177					BPBM 6461		Randall 1997, Mihalitsis and Bellwood 2019
Neoniphon	aurolineatus	Actinopterygii	Holocentriformes	Holocentridae	fusiform	FALSE	18.8	15.2	4.81	3.4	2.22							Randall 1997, Mihalitsis and Bellwood 2019
Neoniphon	aurolineatus	Actinopterygii	Holocentriformes	Holocentridae	fusiform	FALSE	19.2	15.8	4.9	3.62	2.24							Randall 1997, Mihalitsis and Bellwood 2019
Neoniphon	aurolineatus	Actinopterygii	Holocentriformes	Holocentridae	fusiform	FALSE	24.4	17.9	6.3	4.07	2.84							Randall 1997, Mihalitsis and Bellwood 2019
Neoniphon	sammara	Actinopterygii	Holocentriformes	Holocentridae	fusiform	FALSE	18.5	14.9	4.38	3.23	2					BPBM 7970		Randall 1997
Neoniphon	sammara	Actinopterygii	Holocentriformes	Holocentridae	fusiform	FALSE	19.3	16	5.2703	4.06	2.23							Randall 1997, Mihalitsis and Bellwood 2019
Plectrypops	lima	Actinopterygii	Holocentriformes	Holocentridae	compressiform	FALSE	6	5	1.79	1.22	1.05				juvenile			Randall 1997, Mihalitsis and Bellwood 2019
Plectrypops	lima	Actinopterygii	Holocentriformes	Holocentridae	compressiform	FALSE	9.4	7.8	2.8681	1.73	1.55				juvenile			Randall 1997, Mihalitsis and Bellwood 2019
Pristilepis	oligolepis	Actinopterygii	Holocentriformes	Holocentridae	compressiform	FALSE	18.4	14.9	5.5185	3.658	2.921							Randall 1997, Mihalitsis and Bellwood 2019
Pristilepis	oligolepis	Actinopterygii	Holocentriformes	Holocentridae	compressiform	FALSE	21.6	18	6.562	4.391	3.758							Randall 1997, Mihalitsis and Bellwood 2019
Pristilepis	oligolepis	Actinopterygii	Holocentriformes	Holocentridae	compressiform	FALSE	25.2	21.2	7.479	4.86	4.198							Randall 1997, Mihalitsis and Bellwood 2019
Pristilepis	oligolepis	Actinopterygii	Holocentriformes	Holocentridae	compressiform	FALSE	28.2	23.1	8.614	6.125	4.767							Randall 1997, Mihalitsis and Bellwood 2019
Sargocentron	caudimaculatum	Actinopterygii	Holocentriformes	Holocentridae	compressiform	FALSE	11.4	8.9	2.62	1.87	1.01							Randall 1997, Mihalitsis and Bellwood 2019
Sargocentron	caudimaculatum	Actinopterygii	Holocentriformes	Holocentridae	compressiform	FALSE	13.3	11.4	3.84	2.79	1.26							Randall 1997, Mihalitsis and Bellwood 2019
Sargocentron	caudimaculatum	Actinopterygii	Holocentriformes	Holocentridae	compressiform	FALSE	20.6	17.4	5.62	3.94	2.07							Randall 1997, Mihalitsis and Bellwood 2019
Sargocentron	iota	Actinopterygii	Holocentriformes	Holocentridae	compressiform	FALSE	9.5608	7.59	2.613	1.577	1.0626					YCM-P 36349		Hagiwara and Motomura 2019
Sargocentron	ittodai	Actinopterygii	Holocentriformes	Holocentridae	compressiform	FALSE	12.2	9.4	2.83	1.97	1.07							Randall 1997, Mihalitsis and Bellwood 2019
Sargocentron	ittodai	Actinopterygii	Holocentriformes	Holocentridae	compressiform	FALSE	13.7	11.1	3.35	2.25	1.24							Randall 1997, Mihalitsis and Bellwood 2019
Sargocentron	ittodai	Actinopterygii	Holocentriformes	Holocentridae	compressiform	FALSE	17.8	15	4.13	2.87	1.56							Randall 1997
Sargocentron	ittodai	Actinopterygii	Holocentriformes	Holocentridae	compressiform	FALSE	15.8	13.2	3.78	2.578	1.32							Randall 1997, Mihalitsis and Bellwood 2019
Sargocentron	ittodai	Actinopterygii	Holocentriformes	Holocentridae	compressiform	FALSE	15.6	13.4	3.92	2.61	1.45							Randall 1997
Sargocentron	ittodai	Actinopterygii	Holocentriformes	Holocentridae	compressiform	FALSE	15.5	12.9	3.71	2.57	1.38							Randall 1997
Sargocentron	ittodai	Actinopterygii	Holocentriformes	Holocentridae	compressiform	FALSE	16.5	13.5	4	2.79	1.44							Randall 1997
Sargocentron	ittodai	Actinopterygii	Holocentriformes	Holocentridae	compressiform	FALSE	19.6	16.5	4.9	3.4	1.75							Randall 1997, Mihalitsis and Bellwood 2019
Sargocentron	praslin	Actinopterygii	Holocentriformes	Holocentridae	compressiform	FALSE	14	11.5	3.42	2.43	1.55							Randall 1997, Mihalitsis and Bellwood 2019
Sargocentron	praslin	Actinopterygii	Holocentriformes	Holocentridae	compressiform	FALSE	16.5	13.5	3.95	2.72	1.65							Randall 1997, Mihalitsis and Bellwood 2019
Sargocentron	praslin	Actinopterygii	Holocentriformes	Holocentridae	compressiform	FALSE	18.8	15.7	4.6818	2.91	1.86							Randall 1997, Mihalitsis and Bellwood 2019
Sargocentron	punctatissimum	Actinopterygii	Holocentriformes	Holocentridae	compressiform	FALSE	9.6	7.6	2.389	1.781	0.868					BPBM 6601		Randall 1997, Mihalitsis and Bellwood 2019
Sargocentron	punctatissimum	Actinopterygii	Holocentriformes	Holocentridae	compressiform	FALSE	10.7	8.9	2.441	1.745	0.911							Randall 1997, Mihalitsis and Bellwood 2019
Sargocentron	punctatissimum	Actinopterygii	Holocentriformes	Holocentridae	compressiform	FALSE	11.7	9.6	2.773	1.992	0.929							Randall 1997, Mihalitsis and Bellwood 2019
Sargocentron	rubrum	Actinopterygii	Holocentriformes	Holocentridae	compressiform	FALSE	14.1	11.4	3.61	2.34	1.44				juvenile	BPBM 28183		Randall 1997, Mihalitsis and Bellwood 2019
Sargocentron	rubrum	Actinopterygii	Holocentriformes	Holocentridae	compressiform	FALSE	19	15.6	4.44	3.18	1.89							Randall 1997, Mihalitsis and Bellwood 2019
Sargocentron	spiniferum	Actinopterygii	Holocentriformes	Holocentridae	compressiform	FALSE	12.2	10	3.39	2.42	1.27							Randall 1997, Mihalitsis and Bellwood 2019
Sargocentron	spiniferum	Actinopterygii	Holocentriformes	Holocentridae	compressiform	FALSE	29.7	24.6	9.81	7.14	3.78					BPBM 6292		Randall 1997, Mihalitsis and Bellwood 2019
Sargocentron	spiniferum	Actinopterygii	Holocentriformes	Holocentridae	compressiform	FALSE	41.4	35.5	11.35	8.01	4.22							Randall 1997, Mihalitsis and Bellwood 2019
Sargocentron	tiere	Actinopterygii	Holocentriformes	Holocentridae	compressiform	FALSE	18.4	15	5.24	3.8	2.4							Randall 1997, Mihalitsis and Bellwood 2019
Sargocentron	tiere	Actinopterygii	Holocentriformes	Holocentridae	compressiform	FALSE	19	15.7	5.04	3.47	2.27							Randall 1997, Mihalitsis and Bellwood 2019
Sargocentron	tiere	Actinopterygii	Holocentriformes	Holocentridae	compressiform	FALSE	22.3	18.3	5.8	3.87	2.57							Randall 1997, Mihalitsis and Bellwood 2019
Sargocentron	tiere	Actinopterygii	Holocentriformes	Holocentridae	compressiform	FALSE	25.9	20.9	6.71	4.56	2.93							Randall 1997, Mihalitsis and Bellwood 2019
Sargocentron	tiereoides	Actinopterygii	Holocentriformes	Holocentridae	compressiform	FALSE	13.2	11	3.51	2.64	1.48							Randall 1997, Mihalitsis and Bellwood 2019
Sargocentron	tiereoides	Actinopterygii	Holocentriformes	Holocentridae	compressiform	FALSE	15	12.4	4.26	2.96	1.66							Randall 1997
Sargocentron	tiereoides	Actinopterygii	Holocentriformes	Holocentridae	compressiform	FALSE	13.5	11	3.66	2.66	1.53							Randall 1997, Mihalitsis and Bellwood 2019
Sargocentron	violaceum	Actinopterygii	Holocentriformes	Holocentridae	compressiform	FALSE	9.9	8.2	2.8842	2.24	1.14				juvenile			Randall 1997, Mihalitsis and Bellwood 2019
Sargocentron	violaceum	Actinopterygii	Holocentriformes	Holocentridae	compressiform	FALSE	14.2	11.2	3.71	2.52	1.24					BPBM 6325		Randall 1997, Mihalitsis and Bellwood 2019
Istiompax	indica	Actinopterygii	Istiophoriformes	Istiophoridae	fusiform	FALSE	196.8	160.8	40.3	26.8	23.5					Individual 1	It is assumed that "A.P. length of tail from min. width of pedicle" refers to peduncle length, and "AP depth of tail notch" refers to length of caudal fin beyond this	Gregory and Conrad 1939
Istiompax	indica	Actinopterygii	Istiophoriformes	Istiophoridae	fusiform	FALSE	201.5	165.8	42.3	30.8	24.2					Individual 2	It is assumed that "A.P. length of tail from min. width of pedicle" refers to peduncle length, and "AP depth of tail notch" refers to length of caudal fin beyond this	Gregory and Conrad 1939
Istiompax	indica	Actinopterygii	Istiophoriformes	Istiophoridae	fusiform	FALSE	217.5	177.2	45.4	31.9	27					Individual 3	It is assumed that "A.P. length of tail from min. width of pedicle" refers to peduncle length, and "AP depth of tail notch" refers to length of caudal fin beyond this	Gregory and Conrad 1939
Istiompax	indica	Actinopterygii	Istiophoriformes	Istiophoridae	fusiform	FALSE	234	197.5	52.5	36.5	32					Individual 4	It is assumed that "A.P. length of tail from min. width of pedicle" refers to peduncle length, and "AP depth of tail notch" refers to length of caudal fin beyond this	Gregory and Conrad 1939
Istiompax	indica	Actinopterygii	Istiophoriformes	Istiophoridae	fusiform	FALSE	239.4	200.9	51.9	36.5	31					Individual 5	It is assumed that "A.P. length of tail from min. width of pedicle" refers to peduncle length, and "AP depth of tail notch" refers to length of caudal fin beyond this	Gregory and Conrad 1939
Istiompax	indica	Actinopterygii	Istiophoriformes	Istiophoridae	fusiform	FALSE	249.5	202	36.5	19.3	30.5					Individual 6	It is assumed that "A.P. length of tail from min. width of pedicle" refers to peduncle length, and "AP depth of tail notch" refers to length of caudal fin beyond this	Gregory and Conrad 1939
Istiompax	indica	Actinopterygii	Istiophoriformes	Istiophoridae	fusiform	FALSE	255.4	213	54.5	36	31					Individual 7	It is assumed that "A.P. length of tail from min. width of pedicle" refers to peduncle length, and "AP depth of tail notch" refers to length of caudal fin beyond this	Gregory and Conrad 1939
Istiompax	indica	Actinopterygii	Istiophoriformes	Istiophoridae	fusiform	FALSE	262.4	218	49.1	32.3	26.1					Individual 8	It is assumed that "A.P. length of tail from min. width of pedicle" refers to peduncle length, and "AP depth of tail notch" refers to length of caudal fin beyond this	Gregory and Conrad 1939
Istiompax	indica	Actinopterygii	Istiophoriformes	Istiophoridae	fusiform	FALSE	270.7	225.5	57	39.5	33					Individual 9	It is assumed that "A.P. length of tail from min. width of pedicle" refers to peduncle length, and "AP depth of tail notch" refers to length of caudal fin beyond this	Gregory and Conrad 1939
Istiompax	indica	Actinopterygii	Istiophoriformes	Istiophoridae	fusiform	FALSE	319.4	270.4	69	46.5	39					Individual 10	It is assumed that "A.P. length of tail from min. width of pedicle" refers to peduncle length, and "AP depth of tail notch" refers to length of caudal fin beyond this	Gregory and Conrad 1939
Istiompax	indica	Actinopterygii	Istiophoriformes	Istiophoridae	fusiform	FALSE	344	282	76.9	51.9	45.5					Individual 12	It is assumed that "A.P. length of tail from min. width of pedicle" refers to peduncle length, and "AP depth of tail notch" refers to length of caudal fin beyond this	Gregory and Conrad 1939
Istiophorus	platypterus	Actinopterygii	Istiophoriformes	Istiophoridae	fusiform	FALSE	124.956	98.917	25.901	19.698	15.703							Randall 1997
Istiophorus	velifer	Actinopterygii	Istiophoriformes	Istiophoridae	elongate	FALSE	204.8	161.1	41.4		38.4						Listed as "total length" but checking the measurements suggests total length refers to fork length. Orbit-fork length = 181 cm	Velayudham et al. 2012
Kajikia	albida	Actinopterygii	Istiophoriformes	Istiophoridae	elongate	FALSE	170.3	148.3	35.8	25.4	17.8						It is assumed that "A.P. length of tail from min. width of pedicle" refers to peduncle length, and "AP depth of tail notch" refers to length of caudal fin beyond this	Conrad and LaMonte 1937
Kajikia	albida	Actinopterygii	Istiophoriformes	Istiophoridae	elongate	FALSE	210.753		48.5							Specimen 56		Robins 1974
Kajikia	albida	Actinopterygii	Istiophoriformes	Istiophoridae	elongate	FALSE	213.619		48.6							Specimen 9		Robins 1974
Kajikia	albida	Actinopterygii	Istiophoriformes	Istiophoridae	elongate	FALSE	213.109		48							Specimen 27		Robins 1974
Kajikia	albida	Actinopterygii	Istiophoriformes	Istiophoridae	elongate	FALSE	213.94		45.4							Specimen 48		Robins 1974
Kajikia	albida	Actinopterygii	Istiophoriformes	Istiophoridae	elongate	FALSE	214.651		50.5							Specimen 45		Robins 1974
Kajikia	albida	Actinopterygii	Istiophoriformes	Istiophoridae	elongate	FALSE	225.266		48.6							Specimen 6		Robins 1974
Kajikia	albida	Actinopterygii	Istiophoriformes	Istiophoridae	elongate	FALSE	217.49		49.8							Specimen 55		Robins 1974
Kajikia	albida	Actinopterygii	Istiophoriformes	Istiophoridae	elongate	FALSE	221.79		48.6							Specimen 2		Robins 1974
Kajikia	albida	Actinopterygii	Istiophoriformes	Istiophoridae	elongate	FALSE	224.1		48.6							Specimen 30		Robins 1974
Kajikia	albida	Actinopterygii	Istiophoriformes	Istiophoridae	elongate	FALSE	228.415		49.5							Specimen 54		Robins 1974
Kajikia	albida	Actinopterygii	Istiophoriformes	Istiophoridae	elongate	FALSE	225.27		48.6							Specimen 37		Robins 1974
Kajikia	albida	Actinopterygii	Istiophoriformes	Istiophoridae	elongate	FALSE	226.37		49.3							Specimen 12		Robins 1974
Kajikia	albida	Actinopterygii	Istiophoriformes	Istiophoridae	elongate	FALSE	228.336		51.5							Specimen 5		Robins 1974
Kajikia	albida	Actinopterygii	Istiophoriformes	Istiophoridae	elongate	FALSE	229.823		51.8							Specimen 26		Robins 1974
Kajikia	albida	Actinopterygii	Istiophoriformes	Istiophoridae	elongate	FALSE	238.134		52.3							Specimen 44		Robins 1974
Kajikia	albida	Actinopterygii	Istiophoriformes	Istiophoridae	elongate	FALSE	205.358		46.5		29.5					Specimen 28		Robins 1974
Kajikia	albida	Actinopterygii	Istiophoriformes	Istiophoridae	elongate	FALSE	205.058		46.2		29.5					Specimen 18		Robins 1974
Kajikia	albida	Actinopterygii	Istiophoriformes	Istiophoridae	elongate	FALSE	206.668		46		29.4					Specimen 35		Robins 1974
Kajikia	albida	Actinopterygii	Istiophoriformes	Istiophoridae	elongate	FALSE	207.362		46.5		30					Specimen 14		Robins 1974
Kajikia	albida	Actinopterygii	Istiophoriformes	Istiophoridae	elongate	FALSE	207.879		46.1		29.4					Specimen 23		Robins 1974
Kajikia	albida	Actinopterygii	Istiophoriformes	Istiophoridae	elongate	FALSE	208.265		46		29					Specimen 32		Robins 1974
Kajikia	albida	Actinopterygii	Istiophoriformes	Istiophoridae	elongate	FALSE	208.89		47		30.4					Specimen 49		Robins 1974
Kajikia	albida	Actinopterygii	Istiophoriformes	Istiophoridae	elongate	FALSE	210.6		46		29					Specimen 19		Robins 1974
Kajikia	albida	Actinopterygii	Istiophoriformes	Istiophoridae	elongate	FALSE	210.6		46		29					Specimen 47		Robins 1974
Kajikia	albida	Actinopterygii	Istiophoriformes	Istiophoridae	elongate	FALSE	211.256		45.5		29.2					Specimen 15		Robins 1974
Kajikia	albida	Actinopterygii	Istiophoriformes	Istiophoridae	elongate	FALSE	211.256		48.6		31.4					Specimen 24		Robins 1974
Kajikia	albida	Actinopterygii	Istiophoriformes	Istiophoridae	elongate	FALSE	211.911		47.5		31					Specimen 3		Robins 1974
Kajikia	albida	Actinopterygii	Istiophoriformes	Istiophoridae	elongate	FALSE	212.066		47.5		30.5					Specimen 41		Robins 1974
Kajikia	albida	Actinopterygii	Istiophoriformes	Istiophoridae	elongate	FALSE	212.921		45.5		29					Specimen 21		Robins 1974
Kajikia	albida	Actinopterygii	Istiophoriformes	Istiophoridae	elongate	FALSE	212.877		46.5		29.4					Specimen 13		Robins 1974
Kajikia	albida	Actinopterygii	Istiophoriformes	Istiophoridae	elongate	FALSE	214.987		45.8		29					Specimen 7		Robins 1974
Kajikia	albida	Actinopterygii	Istiophoriformes	Istiophoridae	elongate	FALSE	214.687		48		31.5					Specimen 8		Robins 1974
Kajikia	albida	Actinopterygii	Istiophoriformes	Istiophoridae	elongate	FALSE	215.843		46		30					Specimen 17		Robins 1974
Kajikia	albida	Actinopterygii	Istiophoriformes	Istiophoridae	elongate	FALSE	215.343		47.7		30.8					Specimen 40		Robins 1974
Kajikia	albida	Actinopterygii	Istiophoriformes	Istiophoridae	elongate	FALSE	179.488		41		26.5					Specimen 38		Robins 1974
Kajikia	albida	Actinopterygii	Istiophoriformes	Istiophoridae	elongate	FALSE	182.699		42		26.1					Specimen 34		Robins 1974
Kajikia	albida	Actinopterygii	Istiophoriformes	Istiophoridae	elongate	FALSE	183.747		42		27					Specimen 33		Robins 1974
Kajikia	albida	Actinopterygii	Istiophoriformes	Istiophoridae	elongate	FALSE	192.62		41.5		27.1					Specimen 57		Robins 1974
Kajikia	albida	Actinopterygii	Istiophoriformes	Istiophoridae	elongate	FALSE	185.903		41.6		26.8					Specimen 39		Robins 1974
Kajikia	albida	Actinopterygii	Istiophoriformes	Istiophoridae	elongate	FALSE	190.407		42.2		27					Specimen 50		Robins 1974
Kajikia	albida	Actinopterygii	Istiophoriformes	Istiophoridae	elongate	FALSE	194.039		43.7		27.6					Specimen 20		Robins 1974
Kajikia	albida	Actinopterygii	Istiophoriformes	Istiophoridae	elongate	FALSE	190.539		44.5		28.6					Specimen 22		Robins 1974
Kajikia	albida	Actinopterygii	Istiophoriformes	Istiophoridae	elongate	FALSE	189.494		42.3		26.5					Specimen 29		Robins 1974
Kajikia	albida	Actinopterygii	Istiophoriformes	Istiophoridae	elongate	FALSE	192.349		44		28.5					Specimen 1		Robins 1974
Kajikia	albida	Actinopterygii	Istiophoriformes	Istiophoridae	elongate	FALSE	197.615		44.6		29					Specimen 4		Robins 1974
Kajikia	albida	Actinopterygii	Istiophoriformes	Istiophoridae	elongate	FALSE	194.64		45.2		28.1					Specimen 25		Robins 1974
Kajikia	albida	Actinopterygii	Istiophoriformes	Istiophoridae	elongate	FALSE	198.681		43.5		28.2					Specimen 31		Robins 1974
Kajikia	albida	Actinopterygii	Istiophoriformes	Istiophoridae	elongate	FALSE	201.181		44.7		29					Specimen 10		Robins 1974
Kajikia	audax	Actinopterygii	Istiophoriformes	Istiophoridae	elongate	FALSE	206.2	171	44	32	26					Individual 1	It is assumed that "A.P. length of tail from min. width of pedicle" refers to peduncle length, and "AP depth of tail notch" refers to length of caudal fin beyond this	Gregory and Conrad 1939
Kajikia	audax	Actinopterygii	Istiophoriformes	Istiophoridae	elongate	FALSE	204	171.5	45.9	32.6	26.5					Individual 2	It is assumed that "A.P. length of tail from min. width of pedicle" refers to peduncle length, and "AP depth of tail notch" refers to length of caudal fin beyond this	Gregory and Conrad 1939
Kajikia	audax	Actinopterygii	Istiophoriformes	Istiophoridae	elongate	FALSE	241.6	203.3	56.3	40.8	34					Individual 3	It is assumed that "A.P. length of tail from min. width of pedicle" refers to peduncle length, and "AP depth of tail notch" refers to length of caudal fin beyond this	Gregory and Conrad 1939
Kajikia	audax	Actinopterygii	Istiophoriformes	Istiophoridae	elongate	FALSE	247.8	201.8	50.5	33.6	28					Individual 4	It is assumed that "A.P. length of tail from min. width of pedicle" refers to peduncle length, and "AP depth of tail notch" refers to length of caudal fin beyond this	Gregory and Conrad 1939
Kajikia	audax	Actinopterygii	Istiophoriformes	Istiophoridae	elongate	FALSE	249.2	206	58.2	42.7	36					Individual 5	It is assumed that "A.P. length of tail from min. width of pedicle" refers to peduncle length, and "AP depth of tail notch" refers to length of caudal fin beyond this	Gregory and Conrad 1939
Kajikia	audax	Actinopterygii	Istiophoriformes	Istiophoridae	elongate	FALSE	258.8	212.8	59.5	43.5	36.8					Individual 6	It is assumed that "A.P. length of tail from min. width of pedicle" refers to peduncle length, and "AP depth of tail notch" refers to length of caudal fin beyond this	Gregory and Conrad 1939
Kajikia	audax	Actinopterygii	Istiophoriformes	Istiophoridae	elongate	FALSE	255	210	59	42.1	36.5					Individual 7	It is assumed that "A.P. length of tail from min. width of pedicle" refers to peduncle length, and "AP depth of tail notch" refers to length of caudal fin beyond this	Gregory and Conrad 1939
Kajikia	audax	Actinopterygii	Istiophoriformes	Istiophoridae	elongate	FALSE	258	215	58.4	41.5	35					Individual 8	It is assumed that "A.P. length of tail from min. width of pedicle" refers to peduncle length, and "AP depth of tail notch" refers to length of caudal fin beyond this	Gregory and Conrad 1939
Kajikia	audax	Actinopterygii	Istiophoriformes	Istiophoridae	elongate	FALSE	257	209.5	56.5	41	35.5					Individual 9	It is assumed that "A.P. length of tail from min. width of pedicle" refers to peduncle length, and "AP depth of tail notch" refers to length of caudal fin beyond this	Gregory and Conrad 1939
Kajikia	audax	Actinopterygii	Istiophoriformes	Istiophoridae	elongate	FALSE	254.7	210.2	55.3	39.3	35					Individual 10	It is assumed that "A.P. length of tail from min. width of pedicle" refers to peduncle length, and "AP depth of tail notch" refers to length of caudal fin beyond this	Gregory and Conrad 1939
Kajikia	audax	Actinopterygii	Istiophoriformes	Istiophoridae	elongate	FALSE	260	215	58	41.3	35					Individual 11	It is assumed that "A.P. length of tail from min. width of pedicle" refers to peduncle length, and "AP depth of tail notch" refers to length of caudal fin beyond this	Gregory and Conrad 1939
Kajikia	audax	Actinopterygii	Istiophoriformes	Istiophoridae	elongate	FALSE	261.2	216.5	58.5	42.2	36					Individual 12	It is assumed that "A.P. length of tail from min. width of pedicle" refers to peduncle length, and "AP depth of tail notch" refers to length of caudal fin beyond this	Gregory and Conrad 1939
Kajikia	audax	Actinopterygii	Istiophoriformes	Istiophoridae	elongate	FALSE	266	222	61	45	39					Individual 13	It is assumed that "A.P. length of tail from min. width of pedicle" refers to peduncle length, and "AP depth of tail notch" refers to length of caudal fin beyond this	Gregory and Conrad 1939
Kajikia	audax	Actinopterygii	Istiophoriformes	Istiophoridae	elongate	FALSE	264.7	220.5	61.5	46.5	38					Individual 14	It is assumed that "A.P. length of tail from min. width of pedicle" refers to peduncle length, and "AP depth of tail notch" refers to length of caudal fin beyond this	Gregory and Conrad 1939
Kajikia	audax	Actinopterygii	Istiophoriformes	Istiophoridae	elongate	FALSE	266.2	220	63.5	47.5	38					Individual 15	It is assumed that "A.P. length of tail from min. width of pedicle" refers to peduncle length, and "AP depth of tail notch" refers to length of caudal fin beyond this	Gregory and Conrad 1939
Kajikia	audax	Actinopterygii	Istiophoriformes	Istiophoridae	elongate	FALSE	268.6	224.4	63.3	47.5	37.9					Individual 16	It is assumed that "A.P. length of tail from min. width of pedicle" refers to peduncle length, and "AP depth of tail notch" refers to length of caudal fin beyond this	Gregory and Conrad 1939
Kajikia	audax	Actinopterygii	Istiophoriformes	Istiophoridae	elongate	FALSE	271.1	223.6	60.5	45.5	37.1					Individual 17	It is assumed that "A.P. length of tail from min. width of pedicle" refers to peduncle length, and "AP depth of tail notch" refers to length of caudal fin beyond this	Gregory and Conrad 1939
Kajikia	audax	Actinopterygii	Istiophoriformes	Istiophoridae	elongate	FALSE	264.6	221.1	61.3	44.8	37					Individual 18	It is assumed that "A.P. length of tail from min. width of pedicle" refers to peduncle length, and "AP depth of tail notch" refers to length of caudal fin beyond this	Gregory and Conrad 1939
Kajikia	audax	Actinopterygii	Istiophoriformes	Istiophoridae	elongate	FALSE	271	223	59.5	41	36					Individual 19	It is assumed that "A.P. length of tail from min. width of pedicle" refers to peduncle length, and "AP depth of tail notch" refers to length of caudal fin beyond this	Gregory and Conrad 1939
Kajikia	audax	Actinopterygii	Istiophoriformes	Istiophoridae	elongate	FALSE	273	228	57.5	39.1	34					Individual 20	It is assumed that "A.P. length of tail from min. width of pedicle" refers to peduncle length, and "AP depth of tail notch" refers to length of caudal fin beyond this	Gregory and Conrad 1939
Kajikia	audax	Actinopterygii	Istiophoriformes	Istiophoridae	elongate	FALSE	267	227	62	45.2	37					Individual 21	It is assumed that "A.P. length of tail from min. width of pedicle" refers to peduncle length, and "AP depth of tail notch" refers to length of caudal fin beyond this	Gregory and Conrad 1939
Kajikia	audax	Actinopterygii	Istiophoriformes	Istiophoridae	elongate	FALSE	272.7	228.5	64.5	46.7	41					Individual 22	It is assumed that "A.P. length of tail from min. width of pedicle" refers to peduncle length, and "AP depth of tail notch" refers to length of caudal fin beyond this	Gregory and Conrad 1939
Kajikia	audax	Actinopterygii	Istiophoriformes	Istiophoridae	elongate	FALSE	274.8	231.5	66.6	49.4	41.5					Individual 23	It is assumed that "A.P. length of tail from min. width of pedicle" refers to peduncle length, and "AP depth of tail notch" refers to length of caudal fin beyond this	Gregory and Conrad 1939
Kajikia	audax	Actinopterygii	Istiophoriformes	Istiophoridae	elongate	FALSE	272.3	230.1	62.6	45.5	38.2					Individual 24	It is assumed that "A.P. length of tail from min. width of pedicle" refers to peduncle length, and "AP depth of tail notch" refers to length of caudal fin beyond this	Gregory and Conrad 1939
Kajikia	audax	Actinopterygii	Istiophoriformes	Istiophoridae	elongate	FALSE	280.5	234.5	60.5	43.5	37.5					Individual 25	It is assumed that "A.P. length of tail from min. width of pedicle" refers to peduncle length, and "AP depth of tail notch" refers to length of caudal fin beyond this	Gregory and Conrad 1939
Kajikia	audax	Actinopterygii	Istiophoriformes	Istiophoridae	elongate	FALSE	293.1	240.1	69	50	42.1					Individual 26	It is assumed that "A.P. length of tail from min. width of pedicle" refers to peduncle length, and "AP depth of tail notch" refers to length of caudal fin beyond this	Gregory and Conrad 1939
Kajikia	audax	Actinopterygii	Istiophoriformes	Istiophoridae	elongate	FALSE	278.8	233.6	66.1	48.1	41.2					Individual 27	It is assumed that "A.P. length of tail from min. width of pedicle" refers to peduncle length, and "AP depth of tail notch" refers to length of caudal fin beyond this	Gregory and Conrad 1939
Kajikia	audax	Actinopterygii	Istiophoriformes	Istiophoridae	elongate	FALSE	285.5	242	66	48.2	41					Individual 28	It is assumed that "A.P. length of tail from min. width of pedicle" refers to peduncle length, and "AP depth of tail notch" refers to length of caudal fin beyond this	Gregory and Conrad 1939
Kajikia	audax	Actinopterygii	Istiophoriformes	Istiophoridae	elongate	FALSE	288	238.5	66.5	47.5	40					Individual 29	It is assumed that "A.P. length of tail from min. width of pedicle" refers to peduncle length, and "AP depth of tail notch" refers to length of caudal fin beyond this	Gregory and Conrad 1939
Kajikia	audax	Actinopterygii	Istiophoriformes	Istiophoridae	elongate	FALSE	272.5	223.5	44.5	26.5	21					Individual 30	Lower jaw length assumed to be a lapsus and really be 410 mm, as it is 20 cm shorter than all other lower jaws. It is assumed that "A.P. length of tail from min. width of pedicle" refers to peduncle length, and "AP depth of tail notch" refers to length of caudal fin beyond this	Gregory and Conrad 1939
Makaira	nigricans	Actinopterygii	Istiophoriformes	Istiophoridae	fusiform	FALSE	363.033	278	63.9		38.7						Total length estimated using conversion equations of Prager et al. 1995 for total length, then minus known length of bill	Morrow 1958
Makaira	nigricans	Actinopterygii	Istiophoriformes	Istiophoridae	fusiform	FALSE	348.54	291.17	78.06	59.82	44.58							Nichols and LaMonte 1935
Makaira	nigricans	Actinopterygii	Istiophoriformes	Istiophoridae	fusiform	FALSE	200.8	160	37.5	25	19					Individual 1	It is assumed that "A.P. length of tail from min. width of pedicle" refers to peduncle length, and "AP depth of tail notch" refers to length of caudal fin beyond this	Conrad and LaMonte 1937
Makaira	nigricans	Actinopterygii	Istiophoriformes	Istiophoridae	fusiform	FALSE	218.3	172.5	42.5	30	22.5					Individual 2	It is assumed that "A.P. length of tail from min. width of pedicle" refers to peduncle length, and "AP depth of tail notch" refers to length of caudal fin beyond this	Conrad and LaMonte 1937
Makaira	nigricans	Actinopterygii	Istiophoriformes	Istiophoridae	fusiform	FALSE	218.3	176.3	37.8	23.6	30					Individual 3	It is assumed that "A.P. length of tail from min. width of pedicle" refers to peduncle length, and "AP depth of tail notch" refers to length of caudal fin beyond this	Conrad and LaMonte 1937
Makaira	nigricans	Actinopterygii	Istiophoriformes	Istiophoridae	fusiform	FALSE	226.5	185.9	43.4	30.2	28					Individual 4	It is assumed that "A.P. length of tail from min. width of pedicle" refers to peduncle length, and "AP depth of tail notch" refers to length of caudal fin beyond this	Conrad and LaMonte 1937
Makaira	nigricans	Actinopterygii	Istiophoriformes	Istiophoridae	fusiform	FALSE	223.1	185.6	43.6	29.6	28					Individual 5	It is assumed that "A.P. length of tail from min. width of pedicle" refers to peduncle length, and "AP depth of tail notch" refers to length of caudal fin beyond this	Conrad and LaMonte 1937
Makaira	nigricans	Actinopterygii	Istiophoriformes	Istiophoridae	fusiform	FALSE	241.3	193.8	46.9	32.1	25					Individual 7	It is assumed that "A.P. length of tail from min. width of pedicle" refers to peduncle length, and "AP depth of tail notch" refers to length of caudal fin beyond this	Conrad and LaMonte 1937
Makaira	nigricans	Actinopterygii	Istiophoriformes	Istiophoridae	fusiform	FALSE	252.7	206.7	46.4	30.4	33.8					Individual 8	It is assumed that "A.P. length of tail from min. width of pedicle" refers to peduncle length, and "AP depth of tail notch" refers to length of caudal fin beyond this	Conrad and LaMonte 1937
Makaira	nigricans	Actinopterygii	Istiophoriformes	Istiophoridae	fusiform	FALSE	236.9	192.4	47.1	33.1	26					Individual 9	It is assumed that "A.P. length of tail from min. width of pedicle" refers to peduncle length, and "AP depth of tail notch" refers to length of caudal fin beyond this	Conrad and LaMonte 1937
Makaira	nigricans	Actinopterygii	Istiophoriformes	Istiophoridae	fusiform	FALSE	252.5	205	47.1	30.7	26					Individual 11	It is assumed that "A.P. length of tail from min. width of pedicle" refers to peduncle length, and "AP depth of tail notch" refers to length of caudal fin beyond this	Conrad and LaMonte 1937
Makaira	nigricans	Actinopterygii	Istiophoriformes	Istiophoridae	fusiform	FALSE	272.2	218.2	48.5	31	30.5					Individual 13	It is assumed that "A.P. length of tail from min. width of pedicle" refers to peduncle length, and "AP depth of tail notch" refers to length of caudal fin beyond this	Conrad and LaMonte 1937
Makaira	nigricans	Actinopterygii	Istiophoriformes	Istiophoridae	fusiform	FALSE	245.2	211.2	51.7	36.4	26.5					Individual 14	It is assumed that "A.P. length of tail from min. width of pedicle" refers to peduncle length, and "AP depth of tail notch" refers to length of caudal fin beyond this	Conrad and LaMonte 1937
Makaira	nigricans	Actinopterygii	Istiophoriformes	Istiophoridae	fusiform	FALSE	268.2	218	47.7	28.7	30.7					Individual 15	It is assumed that "A.P. length of tail from min. width of pedicle" refers to peduncle length, and "AP depth of tail notch" refers to length of caudal fin beyond this	Conrad and LaMonte 1937
Makaira	nigricans	Actinopterygii	Istiophoriformes	Istiophoridae	fusiform	FALSE	270.4	224.9	52.4	33.9	25.5					Individual 16	It is assumed that "A.P. length of tail from min. width of pedicle" refers to peduncle length, and "AP depth of tail notch" refers to length of caudal fin beyond this	Conrad and LaMonte 1937
Makaira	nigricans	Actinopterygii	Istiophoriformes	Istiophoridae	fusiform	FALSE	283.2	232.2	54.7	37.2	33.3					Individual 17	It is assumed that "A.P. length of tail from min. width of pedicle" refers to peduncle length, and "AP depth of tail notch" refers to length of caudal fin beyond this	Conrad and LaMonte 1937
Makaira	nigricans	Actinopterygii	Istiophoriformes	Istiophoridae	fusiform	FALSE	279.1	221.1	50.6	32.1	35.1					Individual 18	It is assumed that "A.P. length of tail from min. width of pedicle" refers to peduncle length, and "AP depth of tail notch" refers to length of caudal fin beyond this	Conrad and LaMonte 1937
Makaira	nigricans	Actinopterygii	Istiophoriformes	Istiophoridae	fusiform	FALSE	309.7	255.2	59	40.5	35.6					Individual 20	It is assumed that "A.P. length of tail from min. width of pedicle" refers to peduncle length, and "AP depth of tail notch" refers to length of caudal fin beyond this	Conrad and LaMonte 1937
Makaira	nigricans	Actinopterygii	Istiophoriformes	Istiophoridae	fusiform	FALSE	307.1	252.3	55.6	36.9	31					Individual 21	It is assumed that "A.P. length of tail from min. width of pedicle" refers to peduncle length, and "AP depth of tail notch" refers to length of caudal fin beyond this	Conrad and LaMonte 1937
Makaira	nigricans	Actinopterygii	Istiophoriformes	Istiophoridae	fusiform	FALSE	287.2	231.2	58.7	37.7	33					Individual 22	It is assumed that "A.P. length of tail from min. width of pedicle" refers to peduncle length, and "AP depth of tail notch" refers to length of caudal fin beyond this	Conrad and LaMonte 1937
Makaira	nigricans	Actinopterygii	Istiophoriformes	Istiophoridae	fusiform	FALSE	302.5	249	57.2	35.2	31					Individual 23	It is assumed that "A.P. length of tail from min. width of pedicle" refers to peduncle length, and "AP depth of tail notch" refers to length of caudal fin beyond this	Conrad and LaMonte 1937
Tetrapturus	angustirostris	Actinopterygii	Istiophoriformes	Istiophoridae	elongate	FALSE	153.919	135.791	33.12	33.12	20.16					FAKU S357	Total length and standard length calculated from proportions relative to fork length in figured individual	Nakamura 1978
Tetrapturus	angustirostris	Actinopterygii	Istiophoriformes	Istiophoridae	elongate	FALSE	167.815	148.05	34.54	36.11	20.41					FAKU S356	Total length and standard length calculated from proportions relative to fork length in figured individual	Nakamura 1978
Tetrapturus	angustirostris	Actinopterygii	Istiophoriformes	Istiophoridae	elongate	FALSE	196.615		42								"Body length" refers to length to fork minus bill, per authors. Total length estimated from total length/fork length ratio in De La Cruz-Agüero et al. 2019	Robins and de Sylva 1960
Tetrapturus	angustirostris	Actinopterygii	Istiophoriformes	Istiophoridae	elongate	FALSE	165.86	140.68	32.9	26.34	15.5						"Body length" refers to length to lower jaw-fork length, per authors. Total head length with bill 32.9 cm	De La Cruz-Agüero et al. 2019
Tetrapturus	belone	Actinopterygii	Istiophoriformes	Istiophoridae	elongate	FALSE	85.3033	72.8183	19.8		12.6						Total length and standard length estimated from fork length using proportions in specimen figured in this study (fig. 4, USNM 196527)	Robins and de Sylva 1963
Tetrapturus	belone	Actinopterygii	Istiophoriformes	Istiophoridae	elongate	FALSE	140.873	120.255	29.5		18						Total length and standard length estimated from fork length using proportions in specimen figured in this study (fig. 4, USNM 196527)	Robins and de Sylva 1963
Tetrapturus	belone	Actinopterygii	Istiophoriformes	Istiophoridae	elongate	FALSE	141.207	120.54	31	20.966	18.8					USNM 196527		Robins and de Sylva 1963
Tetrapturus	belone	Actinopterygii	Istiophoriformes	Istiophoridae	elongate	FALSE	143.657	122.631	33		20.3						Total length and standard length estimated from fork length using proportions in specimen figured in this study (fig. 4, USNM 196527)	Robins and de Sylva 1963
Tetrapturus	belone	Actinopterygii	Istiophoriformes	Istiophoridae	elongate	FALSE	145.55	124.247	32.8		20.6						Total length and standard length estimated from fork length using proportions in specimen figured in this study (fig. 4, USNM 196527)	Robins and de Sylva 1963
Tetrapturus	belone	Actinopterygii	Istiophoriformes	Istiophoridae	elongate	FALSE	147.666	126.054	30.9		18.2						Total length and standard length estimated from fork length using proportions in specimen figured in this study (fig. 4, USNM 196527)	Robins and de Sylva 1963
Tetrapturus	belone	Actinopterygii	Istiophoriformes	Istiophoridae	elongate	FALSE	149.225	127.385	32		18.7						Total length and standard length estimated from fork length using proportions in specimen figured in this study (fig. 4, USNM 196527)	Robins and de Sylva 1963
Tetrapturus	belone	Actinopterygii	Istiophoriformes	Istiophoridae	elongate	FALSE	149.782	127.86	33.2		20.5						Total length and standard length estimated from fork length using proportions in specimen figured in this study (fig. 4, USNM 196527)	Robins and de Sylva 1963
Tetrapturus	belone	Actinopterygii	Istiophoriformes	Istiophoridae	elongate	FALSE	150.339	128.335	34.4		21.5						Total length and standard length estimated from fork length using proportions in specimen figured in this study (fig. 4, USNM 196527)	Robins and de Sylva 1963
Tetrapturus	belone	Actinopterygii	Istiophoriformes	Istiophoridae	elongate	FALSE	151.452	129.286	34		21.7						Total length and standard length estimated from fork length using proportions in specimen figured in this study (fig. 4, USNM 196527)	Robins and de Sylva 1963
Tetrapturus	belone	Actinopterygii	Istiophoriformes	Istiophoridae	elongate	FALSE	152.566	130.236	32.5		20.2						Total length and standard length estimated from fork length using proportions in specimen figured in this study (fig. 4, USNM 196527)	Robins and de Sylva 1963
Tetrapturus	belone	Actinopterygii	Istiophoriformes	Istiophoridae	elongate	FALSE	153.123	130.712	32		20.5						Total length and standard length estimated from fork length using proportions in specimen figured in this study (fig. 4, USNM 196527)	Robins and de Sylva 1963
Tetrapturus	belone	Actinopterygii	Istiophoriformes	Istiophoridae	elongate	FALSE	153.902	131.377	33.8		21						Total length and standard length estimated from fork length using proportions in specimen figured in this study (fig. 4, USNM 196527)	Robins and de Sylva 1963
Tetrapturus	belone	Actinopterygii	Istiophoriformes	Istiophoridae	elongate	FALSE	154.793	132.138	33.5		21.5						Total length and standard length estimated from fork length using proportions in specimen figured in this study (fig. 4, USNM 196527)	Robins and de Sylva 1963
Tetrapturus	belone	Actinopterygii	Istiophoriformes	Istiophoridae	elongate	FALSE	157.02	134.039	34.5		21						Total length and standard length estimated from fork length using proportions in specimen figured in this study (fig. 4, USNM 196527)	Robins and de Sylva 1963
Tetrapturus	belone	Actinopterygii	Istiophoriformes	Istiophoridae	elongate	FALSE	159.248	135.94	33.5		20.1						Total length and standard length estimated from fork length using proportions in specimen figured in this study (fig. 4, USNM 196527)	Robins and de Sylva 1963
Tetrapturus	belone	Actinopterygii	Istiophoriformes	Istiophoridae	elongate	FALSE	159.804	136.416	35		21.8						Total length and standard length estimated from fork length using proportions in specimen figured in this study (fig. 4, USNM 196527)	Robins and de Sylva 1963
Tetrapturus	belone	Actinopterygii	Istiophoriformes	Istiophoridae	elongate	FALSE	161.475	137.841	35.8		22.5						Total length and standard length estimated from fork length using proportions in specimen figured in this study (fig. 4, USNM 196527)	Robins and de Sylva 1963
Tetrapturus	belone	Actinopterygii	Istiophoriformes	Istiophoridae	elongate	FALSE	162.032	138.317	34								Total length and standard length estimated from fork length using proportions in specimen figured in this study (fig. 4, USNM 196527)	Robins and de Sylva 1963
Tetrapturus	belone	Actinopterygii	Istiophoriformes	Istiophoridae	elongate	FALSE	162.589	138.792	34								Total length and standard length estimated from fork length using proportions in specimen figured in this study (fig. 4, USNM 196527)	Robins and de Sylva 1963
Tetrapturus	belone	Actinopterygii	Istiophoriformes	Istiophoridae	elongate	FALSE	163.145	139.267	36								Total length and standard length estimated from fork length using proportions in specimen figured in this study (fig. 4, USNM 196527)	Robins and de Sylva 1963
Tetrapturus	belone	Actinopterygii	Istiophoriformes	Istiophoridae	elongate	FALSE	166.263	141.929	35.8								Total length and standard length estimated from fork length using proportions in specimen figured in this study (fig. 4, USNM 196527)	Robins and de Sylva 1963
Tetrapturus	belone	Actinopterygii	Istiophoriformes	Istiophoridae	elongate	FALSE	167.043	142.595	33.6	24.412							Total length and standard length estimated from fork length using proportions in specimen figured in this study (fig. 4, USNM 196527)	Robins and de Sylva 1963
Tetrapturus	belone	Actinopterygii	Istiophoriformes	Istiophoridae	elongate	FALSE	168.157	143.545	34.5								Total length and standard length estimated from fork length using proportions in specimen figured in this study (fig. 4, USNM 196527)	Robins and de Sylva 1963
Tetrapturus	belone	Actinopterygii	Istiophoriformes	Istiophoridae	elongate	FALSE	169.493	144.686	36								Total length and standard length estimated from fork length using proportions in specimen figured in this study (fig. 4, USNM 196527)	Robins and de Sylva 1963
Tetrapturus	belone	Actinopterygii	Istiophoriformes	Istiophoridae	elongate	FALSE	172.054	146.872	36.5								Total length and standard length estimated from fork length using proportions in specimen figured in this study (fig. 4, USNM 196527)	Robins and de Sylva 1963
Tetrapturus	belone	Actinopterygii	Istiophoriformes	Istiophoridae	elongate	FALSE	174.282	148.774	36.2								Total length and standard length estimated from fork length using proportions in specimen figured in this study (fig. 4, USNM 196527)	Robins and de Sylva 1963
Tetrapturus	belone	Actinopterygii	Istiophoriformes	Istiophoridae	elongate	FALSE	182.634	155.903	38.7								Total length and standard length estimated from fork length using proportions in specimen figured in this study (fig. 4, USNM 196527)	Robins and de Sylva 1963
Tetrapturus	belone	Actinopterygii	Istiophoriformes	Istiophoridae	elongate	FALSE	185.975	158.755	40.7	29.525							Total length and standard length estimated from fork length using proportions in specimen figured in this study (fig. 4, USNM 196527)	Robins and de Sylva 1963
Tetrapturus	belone	Actinopterygii	Istiophoriformes	Istiophoridae	elongate	FALSE	187.088	159.706	41.6								Total length and standard length estimated from fork length using proportions in specimen figured in this study (fig. 4, USNM 196527)	Robins and de Sylva 1963
Tetrapturus	belone	Actinopterygii	Istiophoriformes	Istiophoridae	elongate	FALSE	190.986	163.033	39.6								Total length and standard length estimated from fork length using proportions in specimen figured in this study (fig. 4, USNM 196527)	Robins and de Sylva 1963
Tetrapturus	belone	Actinopterygii	Istiophoriformes	Istiophoridae	elongate	FALSE	192.656	164.459	40.5								Total length and standard length estimated from fork length using proportions in specimen figured in this study (fig. 4, USNM 196527)	Robins and de Sylva 1963
Tetrapturus	belone	Actinopterygii	Istiophoriformes	Istiophoridae	elongate	FALSE	194.327	165.885	43								Total length and standard length estimated from fork length using proportions in specimen figured in this study (fig. 4, USNM 196527)	Robins and de Sylva 1963
Tetrapturus	belone	Actinopterygii	Istiophoriformes	Istiophoridae	elongate	FALSE	206.576	176.342	40.4								Total length and standard length estimated from fork length using proportions in specimen figured in this study (fig. 4, USNM 196527)	Robins and de Sylva 1963
Tetrapturus	belone	Actinopterygii	Istiophoriformes	Istiophoridae	elongate	FALSE	208.024	177.578	43								Total length and standard length estimated from fork length using proportions in specimen figured in this study (fig. 4, USNM 196527)	Robins and de Sylva 1963
Tetrapturus	georgii	Actinopterygii	Istiophoriformes	Istiophoridae	elongate	FALSE	185.84	161.061	41.016		24.6424					M34SPG1		Beerkircher et al. 2008a; Beerkircher et al. 2008b
Tetrapturus	georgii	Actinopterygii	Istiophoriformes	Istiophoridae	elongate	FALSE	180.932	151.34	37.352		21.3389					M34SPG2	Total length estimates from M35SPG3 (other specimen with photograph had damaged tail fin). Standard length estimated based on the two specimens for which photographs were available	Beerkircher et al. 2008b
Tetrapturus	georgii	Actinopterygii	Istiophoriformes	Istiophoridae	elongate	FALSE	190.596	159.424	39.856		23.1165					M35SPG1	Total length estimates from M35SPG3 (other specimen with photograph had damaged tail fin). Standard length estimated based on the two specimens for which photographs were available	Beerkircher et al. 2008b
Tetrapturus	georgii	Actinopterygii	Istiophoriformes	Istiophoridae	elongate	FALSE	171.16	143	37.4658	29.826	21.736					M35SPG3		Beerkircher et al. 2008b
Tetrapturus	georgii	Actinopterygii	Istiophoriformes	Istiophoridae	elongate	FALSE	171.042	143.068	36.528		21.031					M36SPG17	Total length estimates from M35SPG3 (other specimen with photograph had damaged tail fin). Standard length estimated based on the two specimens for which photographs were available	Beerkircher et al. 2008b
Tetrapturus	georgii	Actinopterygii	Istiophoriformes	Istiophoridae	elongate	FALSE	155.646	130.19	35.179		21.0908					M36SPG6	Total length estimates from M35SPG3 (other specimen with photograph had damaged tail fin). Standard length estimated based on the two specimens for which photographs were available	Beerkircher et al. 2008b
Tetrapturus	georgii	Actinopterygii	Istiophoriformes	Istiophoridae	elongate	FALSE	186.101	155.664	38.7504		22.8826					M35SPG2	Total length estimates from M35SPG3 (other specimen with photograph had damaged tail fin). Standard length estimated based on the two specimens for which photographs were available	Beerkircher et al. 2008b
Tetrapturus	georgii	Actinopterygii	Istiophoriformes	Istiophoridae	elongate	FALSE	186.663	156.134	40.8606		26.0777					M36SPG12	Total length estimates from M35SPG3 (other specimen with photograph had damaged tail fin). Standard length estimated based on the two specimens for which photographs were available	Beerkircher et al. 2008b
Tetrapturus	georgii	Actinopterygii	Istiophoriformes	Istiophoridae	elongate	FALSE	163.85	137.052	34.263		21.4326					M36SPG1	Total length estimates from M35SPG3 (other specimen with photograph had damaged tail fin). Standard length estimated based on the two specimens for which photographs were available	Beerkircher et al. 2008b
Tetrapturus	georgii	Actinopterygii	Istiophoriformes	Istiophoridae	elongate	FALSE	170.818	142.88	37.24		23.408					M36SPG19	Total length estimates from M35SPG3 (other specimen with photograph had damaged tail fin). Standard length estimated based on the two specimens for which photographs were available	Beerkircher et al. 2008b
Tetrapturus	georgii	Actinopterygii	Istiophoriformes	Istiophoridae	elongate	FALSE	166.322	139.12	34.336		22.052					M36SPG11	Total length estimates from M35SPG3 (other specimen with photograph had damaged tail fin). Standard length estimated based on the two specimens for which photographs were available	Beerkircher et al. 2008b
Tetrapturus	georgii	Actinopterygii	Istiophoriformes	Istiophoridae	elongate	FALSE	167.559	140.154	35.6349		22.365					M36SPG13	Total length estimates from M35SPG3 (other specimen with photograph had damaged tail fin). Standard length estimated based on the two specimens for which photographs were available	Beerkircher et al. 2008b
Tetrapturus	georgii	Actinopterygii	Istiophoriformes	Istiophoridae	elongate	FALSE	179.358	150.024	38.6232		24.5784					M36SPG8	Total length estimates from M35SPG3 (other specimen with photograph had damaged tail fin). Standard length estimated based on the two specimens for which photographs were available	Beerkircher et al. 2008b
Tetrapturus	georgii	Actinopterygii	Istiophoriformes	Istiophoridae	elongate	FALSE	161.94	135.454	34.8722		21.4709					M36SPG7	Total length estimates from M35SPG3 (other specimen with photograph had damaged tail fin). Standard length estimated based on the two specimens for which photographs were available	Beerkircher et al. 2008b
Tetrapturus	georgii	Actinopterygii	Istiophoriformes	Istiophoridae	elongate	FALSE	166.21	139.026	35.496		22.185					M36SPG18	Total length estimates from M35SPG3 (other specimen with photograph had damaged tail fin). Standard length estimated based on the two specimens for which photographs were available	Beerkircher et al. 2008b
Tetrapturus	pfluegeri	Actinopterygii	Istiophoriformes	Istiophoridae	elongate	FALSE	194.856	166.791	42		26.3					Specimen 26	Total length estimated from total length/fork length ratio in one figured specimen	Robins and de Sylva 1963
Tetrapturus	pfluegeri	Actinopterygii	Istiophoriformes	Istiophoridae	elongate	FALSE	198.9	170.278	41	31.047	25.9					Specimen 35		Robins and de Sylva 1963
Tetrapturus	pfluegeri	Actinopterygii	Istiophoriformes	Istiophoridae	elongate	FALSE	168.435	144.176	36.1								"Body length" refers to length to lower jaw-fork length, per authors. Total and standard length estimated from morphometric ratio relative to fork length in one figured specimen	Robins and de Sylva 1960
Tetrapturus	pfluegeri	Actinopterygii	Istiophoriformes	Istiophoridae	elongate	FALSE	168.435	144.176	36.9								"Body length" refers to length to lower jaw-fork length, per authors. Total and standard length estimated from morphometric ratio relative to fork length in one figured specimen	Robins and de Sylva 1960
Tetrapturus	pfluegeri	Actinopterygii	Istiophoriformes	Istiophoridae	elongate	FALSE	173.609	148.605	37.8								"Body length" refers to length to lower jaw-fork length, per authors. Total and standard length estimated from morphometric ratio relative to fork length in one figured specimen	Robins and de Sylva 1960
Tetrapturus	pfluegeri	Actinopterygii	Istiophoriformes	Istiophoridae	elongate	FALSE	178.673	152.939	37.2								"Body length" refers to length to lower jaw-fork length, per authors. Total and standard length estimated from morphometric ratio relative to fork length in one figured specimen	Robins and de Sylva 1960
Tetrapturus	pfluegeri	Actinopterygii	Istiophoriformes	Istiophoridae	elongate	FALSE	182.196	155.955	41.4								"Body length" refers to length to lower jaw-fork length, per authors. Total and standard length estimated from morphometric ratio relative to fork length in one figured specimen	Robins and de Sylva 1960
Tetrapturus	pfluegeri	Actinopterygii	Istiophoriformes	Istiophoridae	elongate	FALSE	183.297	156.897	37.5								"Body length" refers to length to lower jaw-fork length, per authors. Total and standard length estimated from morphometric ratio relative to fork length in one figured specimen	Robins and de Sylva 1960
Tetrapturus	pfluegeri	Actinopterygii	Istiophoriformes	Istiophoridae	elongate	FALSE	197.058	168.676	41.3								"Body length" refers to length to lower jaw-fork length, per authors. Total and standard length estimated from morphometric ratio relative to fork length in one figured specimen	Robins and de Sylva 1960
Xiphias	gladius	Actinopterygii	Istiophoriformes	Istiophoridae	fusiform	FALSE	98	76	17.5						subadult			Quigley and Flannery 1989
Xiphias	gladius	Actinopterygii	Istiophoriformes	Istiophoridae	fusiform	FALSE	225.89	182.69	51	35.41	24	17.58						Raven and LaMonte 1937, Gregory and Conrad 1937
Xiphias	gladius	Actinopterygii	Istiophoriformes	Istiophoridae	fusiform	FALSE	282.385	238.76	63.5		34.29						Total length estimated from fork length using equation of Taylor and Murphy (1992)	Gregory and Conrad 1937
Xiphias	gladius	Actinopterygii	Istiophoriformes	Istiophoridae	fusiform	FALSE	303.4	238.163	60.6501								Total length estimated from fork length using equation of Taylor and Murphy (1992) and proportions of other specimens in Gregory and Conrad (1937)	Gregory and Conrad 1937
Xiphias	gladius	Actinopterygii	Istiophoriformes	Istiophoridae	fusiform	FALSE	249.56	199.42	50.83								Total length estimated from fork length using equation of Taylor and Murphy (1992)	Gregory and Conrad 1937
Cheilodipterus	macrodon	Actinopterygii	Kurtiformes	Apogonidae	fusiform	FALSE	14.5	11.3	3.804	2.845	1.82							Randall 1997, Mihalitsis and Bellwood 2019
Cheilodipterus	macrodon	Actinopterygii	Kurtiformes	Apogonidae	fusiform	FALSE	16.5	13.3	4.607	3.583	1.997							Randall 1997, Mihalitsis and Bellwood 2019
Cheilodipterus	macrodon	Actinopterygii	Kurtiformes	Apogonidae	fusiform	FALSE	19.8	15.9	5.667	4.334	3.245							Randall 1997, Mihalitsis and Bellwood 2019
Cheilodipterus	quinquelineatus	Actinopterygii	Kurtiformes	Apogonidae	fusiform	FALSE	7.1	5.5	2.0971									Randall 1997, Mihalitsis and Bellwood 2019
Cheilodipterus	quinquelineatus	Actinopterygii	Kurtiformes	Apogonidae	fusiform	FALSE	9	7	2.66	1.94	1.31							Randall 1997
Cheilodipterus	quinquelineatus	Actinopterygii	Kurtiformes	Apogonidae	fusiform	FALSE	9.4	7.4	2.72	2.03	0.64							Randall 1997, Mihalitsis and Bellwood 2019
Holapogon	maximus	Actinopterygii	Kurtiformes	Apogonidae	fusiform	FALSE	23.025	15.634	6.76951		3.15806							Said Koya et al. 2011
Holapogon	maximus	Actinopterygii	Kurtiformes	Apogonidae	fusiform	FALSE	23.735	15.7838	6.62919		3.03048							Said Koya et al. 2011
Holapogon	maximus	Actinopterygii	Kurtiformes	Apogonidae	fusiform	FALSE	23	17	6.48	3.976	2.993							Randall 1997
Jaydia	novaeguineae	Actinopterygii	Kurtiformes	Apogonidae	fusiform	FALSE	10.51	8.8	3.06	1.9	1.53					SMF 35008	Regression equation for J. smithi used because no equation available for J. novaeguineae	Bogorodsky et al. 2014
Jaydia	novaeguineae	Actinopterygii	Kurtiformes	Apogonidae	fusiform	FALSE	8.7	7.2	2.66	1.62	1.3					KAU 58	Regression equation for J. smithi used because no equation available for J. novaeguineae	Bogorodsky et al. 2014
Jaydia	smithi	Actinopterygii	Kurtiformes	Apogonidae	fusiform	FALSE	10.07	8.2	3.03	1.84	1.53					SMF 35013		Bogorodsky et al. 2014
Bolbometopon	muricatum	Actinopterygii	Labriformes	Scaridae	fusiform	FALSE	62.2	51	15.354	9.207	3.604							Randall 1997
Bolbometopon	muricatum	Actinopterygii	Labriformes	Scaridae	fusiform	FALSE	117.136	95.31	28.295	18.93	4.947					KAUM-I 25448		Ogihara et al. 2010
Bolbometopon	muricatum	Actinopterygii	Labriformes	Scaridae	fusiform	FALSE	63.7776	51.6	13.954	8.874	3.14					KAUM-I 22153		Ogihara et al. 2010
Cetoscarus	ocellatus	Actinopterygii	Labriformes	Scaridae	fusiform	FALSE	43.2	34.6	11.7	8.643	3.281							Randall 1997
Cetoscarus	ocellatus	Actinopterygii	Labriformes	Scaridae	fusiform	FALSE	45.4	37	12.652	8.476	3.498							Randall 1997
Cetoscarus	ocellatus	Actinopterygii	Labriformes	Scaridae	fusiform	FALSE	45.7	37	12.8	9.357	3.449							Randall 1997
Cheilinus	undulatus	Actinopterygii	Labriformes	Labridae	fusiform	FALSE	61.5	51.8	19.79	14.68					adult			Nair 2004
Coris	nigrofasciata	Actinopterygii	Labriformes	Labridae	fusiform	FALSE	39	31.8	8.666	5.488	2.036						Head length measured minus opercular flap	Randall 1997
Coris	nigrofasciata	Actinopterygii	Labriformes	Labridae	fusiform	FALSE	30.7	25.3	7.06	4.317	1.774						Head length measured minus opercular flap	Randall 1997
Coris	nigrofasciata	Actinopterygii	Labriformes	Labridae	fusiform	FALSE	23.7	19.5	5.136	3.266	1.164							Randall 1997
Coris	nigrofasciata	Actinopterygii	Labriformes	Labridae	fusiform	FALSE	33	27.4	7.479	4.769	1.777						Head length measured minus opercular flap	Randall 1997
Coris	nigrofasciata	Actinopterygii	Labriformes	Labridae	fusiform	FALSE	43.5	35.5	9.564	6.048	2.341						Head length measured minus opercular flap	Randall 1997
Coris	pictoides	Actinopterygii	Labriformes	Labridae	fusiform	FALSE	19.8	16.7	3.977	2.228	0.836						Head length measured minus opercular flap	Randall 1997
Coris	pictoides	Actinopterygii	Labriformes	Labridae	fusiform	FALSE	7.5	6.5	1.468	0.943	0.514						Head length measured minus opercular flap	Randall 1997
Coris	pictoides	Actinopterygii	Labriformes	Labridae	fusiform	FALSE	7.8	6.4	1.831	1.25	0.582						Head length measured minus opercular flap	Randall 1997
Coris	pictoides	Actinopterygii	Labriformes	Labridae	fusiform	FALSE	7.2	5.9	1.556	1.119	0.468						Head length measured minus opercular flap	Randall 1997
Gomphosus	varius	Actinopterygii	Labriformes	Labridae	fusiform	FALSE	10.7	8.8	3.042	2.495	0.936						Head length measured minus opercular flap	Randall 1997
Gomphosus	varius	Actinopterygii	Labriformes	Labridae	fusiform	FALSE	22.9	19.8	7.663	5.688	1.898						Head length measured minus opercular flap	Randall 1997
Halichoeres	trimaculatus	Actinopterygii	Labriformes	Labridae	fusiform	FALSE	12.7	10.3	2.896	1.8	0.779							Randall 1997
Halichoeres	trimaculatus	Actinopterygii	Labriformes	Labridae	fusiform	FALSE	16.8	13.7	4.3	2.61	0.93							Randall 1997
Halichoeres	trimaculatus	Actinopterygii	Labriformes	Labridae	fusiform	FALSE	13.3	10.9	3.47	2.13	0.83							Randall 1997
Hologymnosus	annulatus	Actinopterygii	Labriformes	Labridae	fusiform	FALSE	28.7	24.7	6.67	4.49	1.8				adult			Randall 1997, Mihalitsis and Bellwood 2019
Hologymnosus	annulatus	Actinopterygii	Labriformes	Labridae	fusiform	FALSE	38.1	31.5	9.4	6.77	2.09				adult			Randall 1997
Hologymnosus	annulatus	Actinopterygii	Labriformes	Labridae	fusiform	FALSE	39.6	32.2	8.82	5.79	2.01				adult			Randall 1997
Hologymnosus	annulatus	Actinopterygii	Labriformes	Labridae	fusiform	FALSE	37.1	31.7	9.47	5.99	1.57				adult			Randall 1997
Hologymnosus	doliatus	Actinopterygii	Labriformes	Labridae	fusiform	FALSE	22.6	19.2	5.626	4.013	1.164							Randall 1997, Mihalitsis and Bellwood 2019
Hologymnosus	doliatus	Actinopterygii	Labriformes	Labridae	fusiform	FALSE	26.9	23	6.482	4.757	1.743							Randall 1997, Mihalitsis and Bellwood 2019
Hologymnosus	doliatus	Actinopterygii	Labriformes	Labridae	fusiform	FALSE	27.9	24.1	6.732	4.671	1.71							Randall 1997, Mihalitsis and Bellwood 2019
Hologymnosus	doliatus	Actinopterygii	Labriformes	Labridae	fusiform	FALSE	28.5	24.2	6.759	4.768	1.484							Randall 1997, Mihalitsis and Bellwood 2019
Hologymnosus	doliatus	Actinopterygii	Labriformes	Labridae	fusiform	FALSE	36.154	30.8	9.282	6.405	1.941							Randall 1997
Labrus	mixtus	Actinopterygii	Labriformes	Labridae	fusiform	FALSE	33.6	29.8	9.7	6.11	3.1					FSB-Lab-mix-01		Rafrafi-Nouira et al. 2012b
Labrus	mixtus	Actinopterygii	Labriformes	Labridae	fusiform	FALSE	30.1	26.4	8.6	5.28	2.36					FSB-Lab-mix-02		Rafrafi-Nouira et al. 2012b
Oxycheilinus	digrammus	Actinopterygii	Labriformes	Labridae	fusiform	FALSE	13.3	10.8	3.8974	2.81	1.323							Randall 1997, Mihalitsis and Bellwood 2019
Oxycheilinus	digrammus	Actinopterygii	Labriformes	Labridae	fusiform	FALSE	13.8	11.3	3.9338	2.82	1.15							Randall 1997, Mihalitsis and Bellwood 2019
Oxycheilinus	digrammus	Actinopterygii	Labriformes	Labridae	fusiform	FALSE	14.5	11.7	4.38	3.318	1.594							Randall 1997, Mihalitsis and Bellwood 2019
Oxycheilinus	digrammus	Actinopterygii	Labriformes	Labridae	fusiform	FALSE	18	15	4.84	3.9	1.9							Randall 1997, Mihalitsis and Bellwood 2019
Oxycheilinus	digrammus	Actinopterygii	Labriformes	Labridae	fusiform	FALSE	27.2	21.7	7.869	6.16	2.669							Randall 1997, Mihalitsis and Bellwood 2019
Scarus	maculipinna	Actinopterygii	Labriformes	Scaridae	fusiform	FALSE	15.52	13.06	3.97	2.69						PMBC 20408		Westneat et al. 2007
Scarus	maculipinna	Actinopterygii	Labriformes	Scaridae	fusiform	FALSE	19.05	14.88	4.33							PMBC 20409		Westneat et al. 2007
Scarus	maculipinna	Actinopterygii	Labriformes	Scaridae	fusiform	FALSE	24.2	19.02	5.93							PMBC 20409		Westneat et al. 2007
Scarus	maculipinna	Actinopterygii	Labriformes	Scaridae	fusiform	FALSE	17.56	13.78	4.14							FMNH 117284		Westneat et al. 2007
Scarus	maculipinna	Actinopterygii	Labriformes	Scaridae	fusiform	FALSE	17.38	14.11	4.05							FMNH 117284		Westneat et al. 2007
Scarus	maculipinna	Actinopterygii	Labriformes	Scaridae	fusiform	FALSE	18.69	15.02	4.74							FMNH 117284		Westneat et al. 2007
Scarus	maculipinna	Actinopterygii	Labriformes	Scaridae	fusiform	FALSE	12.4	10.31	3.23							FMNH 117284		Westneat et al. 2007
Scarus	maculipinna	Actinopterygii	Labriformes	Scaridae	fusiform	FALSE	18.68	14.8	4.59	2.91						FMNH 117285		Westneat et al. 2007
Scarus	maculipinna	Actinopterygii	Labriformes	Scaridae	fusiform	FALSE	12.84	10.78	3.3							FMNH 117285		Westneat et al. 2007
Scarus	obishme	Actinopterygii	Labriformes	Scaridae	fusiform	FALSE	76.982	61	22.875	8.78658						NSMT-P 35477		Randall and Earle 1993
Scarus	obishme	Actinopterygii	Labriformes	Scaridae	fusiform	FALSE	28.0896	23.1	7.4151							BPBM 35075		Randall and Earle 1993
Scarus	obishme	Actinopterygii	Labriformes	Scaridae	fusiform	FALSE	30.1568	24.8	7.9856							USNM 323664		Randall and Earle 1993
Scarus	obishme	Actinopterygii	Labriformes	Scaridae	fusiform	FALSE	31.9968	26.4	8.5008	3.73985						BPBM 35093		Randall and Earle 1993
Scarus	obishme	Actinopterygii	Labriformes	Scaridae	fusiform	FALSE	32.277	26.5	8.8775							NSMT-P 35478		Randall and Earle 1993
Lampris	australensis	Actinopterygii	Lampriformes	Lampridae	compressiform	FALSE	82.2	67.3	24.228								CSIRO H4880-01	Underkoffler et al. 2018
Lampris	australensis	Actinopterygii	Lampriformes	Lampridae	compressiform	FALSE	63.6	53.8	18.8838								CSIRO H1993-01	Underkoffler et al. 2018
Lampris	guttatus	Actinopterygii	Lampriformes	Lampridae	compressiform	FALSE	91.44	85.09	28.702		9.144							Gudger 1931
Lampris	guttatus	Actinopterygii	Lampriformes	Lampridae	compressiform	FALSE	92.71		25.4		9.144							Gudger 1931
Lampris	guttatus	Actinopterygii	Lampriformes	Lampridae	compressiform	FALSE	80.5	68.8	21.6	13.576	6.361							Gudger 1930
Lampris	guttatus	Actinopterygii	Lampriformes	Lampridae	compressiform	FALSE	88	80	26.3									Sulić Šprem et al. 2014
Lampris	incognitus	Actinopterygii	Lampriformes	Lampridae	compressiform	FALSE	98.8	82.8	29.4768	17.162	7.243					USNM 402731		Underkoffler et al. 2018
Lampris	incognitus	Actinopterygii	Lampriformes	Lampridae	compressiform	FALSE	106.5	86.2	30.9458							USNM 402732		Underkoffler et al. 2018
Lampris	megalopsis	Actinopterygii	Lampriformes	Lampridae	compressiform	FALSE	104.2	85.3	30.708							USNM 402733		Underkoffler et al. 2018
Lampris	megalopsis	Actinopterygii	Lampriformes	Lampridae	compressiform	FALSE	94.3	73.4	26.2772							USNM 402734		Underkoffler et al. 2018
Lophotis	lacepede	Actinopterygii	Lampriformes	Lophotidae	anguilliform	FALSE	167	159	23.4									Dulčić and Soldo 2008
Lophotis	lacepede	Actinopterygii	Lampriformes	Lophotidae	anguilliform	FALSE	132	128	16.7									Bachouche et al. 2016
Lophotis	lacepede	Actinopterygii	Lampriformes	Lophotidae	anguilliform	FALSE	91.5	89.3	11.98									Falsone et al. 2017
Lophotis	lacepede	Actinopterygii	Lampriformes	Lophotidae	anguilliform	FALSE	147	143.325	22.932									Falsone et al. 2017
Lophotis	lacepede	Actinopterygii	Lampriformes	Lophotidae	anguilliform	FALSE	139	134.5	18									Sulić Šprem et al. 2014
Regalecus	glesne	Actinopterygii	Lampriformes	Lampridae	anguilliform	FALSE	457	457	20	14.0192						CNPICT 2004/40		Ruiz and Gosztonyi 2010
Regalecus	glesne	Actinopterygii	Lampriformes	Lampridae	anguilliform	FALSE	380.5	380.5	19.1									Ruiz and Gosztonyi 2010
Regalecus	russellii	Actinopterygii	Lampriformes	Lampridae	anguilliform	FALSE	385		23.87									Lee et al. 2013
Regalecus	russellii	Actinopterygii	Lampriformes	Lampridae	anguilliform	FALSE	367		20.185									Lee et al. 2013
Zu	cristatus	Actinopterygii	Lampriformes	Trachipteridae	macruriform	FALSE	87.6	73.3	12.8									Falsone et al. 2017
Zu	cristatus	Actinopterygii	Lampriformes	Trachipteridae	macruriform	FALSE	121.9	110.441	19.1064									Falsone et al. 2017
Zu	cristatus	Actinopterygii	Lampriformes	Trachipteridae	macruriform	FALSE	110.5	98.0135	15.9762									Falsone et al. 2017
Atractosteus	spatula	Actinopterygii	Lepisosteiformes	Lepisosteidae	elongate	FALSE	105.45	96.28	29.82	23.12	12.1						Single figured specimen.	McDonald et al. 2013
Atractosteus	spatula	Actinopterygii	Lepisosteiformes	Lepisosteidae	elongate	FALSE	99.7245	87.9	26.01	22.7		7.08					Total length estimated from standard length using equations in Snow et al. 2020. Head length in McDonald et al. 2013 measured to base of occiput, excluding opercular series, therefore operculum length was manually added back in	McDonald et al. 2013, Snow et al. 2020
Atractosteus	spatula	Actinopterygii	Lepisosteiformes	Lepisosteidae	elongate	FALSE	103.988	91.7	26.05	22.51		7.36					Total length estimated from standard length using equations in Snow et al. 2020. Head length in McDonald et al. 2013 measured to base of occiput, excluding opercular series, therefore operculum length was manually added back in	McDonald et al. 2013, Snow et al. 2020
Lepisosteus	oculatus	Actinopterygii	Lepisosteiformes	Lepisosteidae	elongate	FALSE	66	58	15.9	13.8	9	3.084				CMNH 1b		Present Study
Lepisosteus	osseus	Actinopterygii	Lepisosteiformes	Lepisosteidae	elongate	FALSE	78.4	70.5	20.4	18.4	13.928	2.476				CMNH 2299a		Present Study
Lepisosteus	osseus	Actinopterygii	Lepisosteiformes	Lepisosteidae	elongate	FALSE	64.4	57.1	17.5	15.8	11.8	1.989				CMNH 2299b		Present Study
Lepisosteus	osseus	Actinopterygii	Lepisosteiformes	Lepisosteidae	elongate	FALSE	53.9	47.1	17.2	16	12.1	1.896				CMNH 2299c		Present Study
Lepisosteus	osseus	Actinopterygii	Lepisosteiformes	Lepisosteidae	elongate	FALSE	72.8	65	18.8	17.1	12.6	2.005				CMNH 1a		Present Study
Histrio	histrio	Actinopterygii	Lophiiformes	Antennariidae	compressiform	FALSE	9.1	6.2	2.4083	1.294	1.539							Randall 1997, Mihalitsis and Bellwood 2019
Aprion	virescens	Actinopterygii	Lutjaniformes	Lutjanidae	fusiform	FALSE	43.1	33.9	10.169	7.43	3.865							Randall 1997, Mihalitsis and Bellwood 2019
Apsilus	dentatus	Actinopterygii	Lutjaniformes	Lutjanidae	fusiform	FALSE	52.4	39.2	13	8.66	3.59	3.82				FSBC 12633		Present Study
Diagramma	pictum	Actinopterygii	Lutjaniformes	Haemulidae	fusiform	FALSE	42.38	34.36	9.45	6.22	3.48							Osmany, pers. comm. (FishBase)
Diagramma	pictum	Actinopterygii	Lutjaniformes	Haemulidae	fusiform	FALSE	23.6	19.4	5.2	3.49	1.76							Randall 1997, Mihalitsis and Bellwood 2019
Diagramma	pictum	Actinopterygii	Lutjaniformes	Haemulidae	fusiform	FALSE	25.4	21	6.29	4.16	1.95							Randall 1997, Mihalitsis and Bellwood 2019
Diagramma	pictum	Actinopterygii	Lutjaniformes	Haemulidae	fusiform	FALSE	30.5	24.2	6.55	4.35	2.14							Randall 1997, Mihalitsis and Bellwood 2019
Diagramma	pictum	Actinopterygii	Lutjaniformes	Haemulidae	fusiform	FALSE	43	35.2	9.143	6.162	2.875							Randall 1997, Mihalitsis and Bellwood 2019
Diagramma	punctatum	Actinopterygii	Lutjaniformes	Haemulidae	fusiform	FALSE	59.4	50.4	15.06	10.01	4.54							Randall 1997, Mihalitsis and Bellwood 2019
Etelis	coruscans	Actinopterygii	Lutjaniformes	Lutjanidae	fusiform	FALSE	51.5	37	10.176	7.386	4.581							Randall 1997
Etelis	coruscans	Actinopterygii	Lutjaniformes	Lutjanidae	fusiform	FALSE	74.2	55.7	15.258	10.801	6.338							Randall 1997
Etelis	oculatus	Actinopterygii	Lutjaniformes	Lutjanidae	fusiform	FALSE	68	55	17	9.22	5.41	5.021				FSBC 7936		Present Study
Etelis	radiosus	Actinopterygii	Lutjaniformes	Lutjanidae	fusiform	FALSE	64.8835	51.7	14.6828	9.2757	7.2897					KAUM-I 68890		Hata et al. 2015b
Lutjanus	adetii	Actinopterygii	Lutjaniformes	Lutjanidae	fusiform	FALSE	21.182	17	5.215	3.556	2.007							Randall 1997, Mihalitsis and Bellwood 2019
Lutjanus	adetii	Actinopterygii	Lutjaniformes	Lutjanidae	fusiform	FALSE	30.627	25	7.855	5.419	3.162							Randall 1997, Mihalitsis and Bellwood 2019
Lutjanus	argentimaculatus	Actinopterygii	Lutjaniformes	Lutjanidae	fusiform	FALSE	30.5	25.8	8.7908	5.766	3.594							Randall 1997, Mihalitsis and Bellwood 2019
Lutjanus	argentimaculatus	Actinopterygii	Lutjaniformes	Lutjanidae	fusiform	FALSE	55.4	44.7	15.758	10.761	5.868							Randall 1997, Mihalitsis and Bellwood 2019
Lutjanus	argentimaculatus	Actinopterygii	Lutjaniformes	Lutjanidae	fusiform	FALSE	61.2	50.9	19.744	13.469	7.731							Randall 1997, Mihalitsis and Bellwood 2019
Lutjanus	bohar	Actinopterygii	Lutjaniformes	Lutjanidae	fusiform	FALSE	32.7	26.3	9.5181	6.975	4.22							Randall 1997, Mihalitsis and Bellwood 2019
Lutjanus	bohar	Actinopterygii	Lutjaniformes	Lutjanidae	fusiform	FALSE	63.5	52	18.19	12.541	7.528							Randall 1997, Mihalitsis and Bellwood 2019
Lutjanus	campechanus	Actinopterygii	Lutjaniformes	Lutjanidae	fusiform	FALSE	75.2	65	24.7									Goode and Bean 1878a
Lutjanus	campechanus	Actinopterygii	Lutjaniformes	Lutjanidae	fusiform	FALSE	61.3	52	19.76									Goode and Bean 1878a
Lutjanus	campechanus	Actinopterygii	Lutjaniformes	Lutjanidae	fusiform	FALSE	66.04	56	21							USNM 21330	holotype of L. blackfordi	Goode and Bean 1878a
Lutjanus	carponotatus	Actinopterygii	Lutjaniformes	Lutjanidae	fusiform	FALSE	10.8	8.7	2.86	1.96	1.21							Randall 1997, Mihalitsis and Bellwood 2019
Lutjanus	carponotatus	Actinopterygii	Lutjaniformes	Lutjanidae	fusiform	FALSE	16.2	13.1	4.65	3.13	2.02							Randall 1997, Mihalitsis and Bellwood 2019
Lutjanus	carponotatus	Actinopterygii	Lutjaniformes	Lutjanidae	fusiform	FALSE	21.1	17.3	5.86	4.12	2.6							Randall 1997, Mihalitsis and Bellwood 2019
Lutjanus	carponotatus	Actinopterygii	Lutjaniformes	Lutjanidae	fusiform	FALSE	27.2	21.5	7.13	4.98	2.64							Randall 1997, Mihalitsis and Bellwood 2019
Lutjanus	cyanopterus	Actinopterygii	Lutjaniformes	Lutjanidae	fusiform	FALSE	146.621		41.2								Total length calculated using fork length/total length proportions in other reported specimens	Schwartz 1972
Lutjanus	cyanopterus	Actinopterygii	Lutjaniformes	Lutjanidae	fusiform	FALSE	121.9	101.7	38.1							UNC 5226		Schwartz 1972
Lutjanus	cyanopterus	Actinopterygii	Lutjaniformes	Lutjanidae	fusiform	FALSE	128.2	108.7	36.9							UNC 6030		Schwartz 1972
Lutjanus	cyanopterus	Actinopterygii	Lutjaniformes	Lutjanidae	fusiform	FALSE	79	64.5	23	15.61	8.84	6.567				FSBC 4001		Present Study
Lutjanus	decussatus	Actinopterygii	Lutjaniformes	Lutjanidae	fusiform	FALSE	19.7	16.2	5.49	3.89	2.34							Randall 1997, Mihalitsis and Bellwood 2019
Lutjanus	dentatus	Actinopterygii	Lutjaniformes	Lutjanidae	fusiform	FALSE	109.865	91.36	31.012	21.406	10.554				adult			García-Mederos and Tuset 2014
Lutjanus	kasmira	Actinopterygii	Lutjaniformes	Lutjanidae	fusiform	FALSE	26.9	22.1	7.9292	5.08	2.84							Randall 1997, Mihalitsis and Bellwood 2019
Lutjanus	kasmira	Actinopterygii	Lutjaniformes	Lutjanidae	fusiform	FALSE	27.4	22.7	7.67	5.07	2.71							Randall 1997, Mihalitsis and Bellwood 2019
Lutjanus	malabaricus	Actinopterygii	Lutjaniformes	Lutjanidae	fusiform	FALSE	25.2	20.2	6.8	4.9	2.88							Randall 1997, Mihalitsis and Bellwood 2019
Lutjanus	malabaricus	Actinopterygii	Lutjaniformes	Lutjanidae	fusiform	FALSE	39.6	32.5	11.22	7.78	4.24							Randall 1997, Mihalitsis and Bellwood 2019
Lutjanus	malabaricus	Actinopterygii	Lutjaniformes	Lutjanidae	fusiform	FALSE	47.8	37.3	13.239	9.272	5.646							Randall 1997, Mihalitsis and Bellwood 2019
Lutjanus	malabaricus	Actinopterygii	Lutjaniformes	Lutjanidae	fusiform	FALSE	56	43.4	15.28	10.24	5.8							Randall 1997, Mihalitsis and Bellwood 2019
Lutjanus	malabaricus	Actinopterygii	Lutjaniformes	Lutjanidae	fusiform	FALSE	69.7	57	20.379	13.654	8.006							Randall 1997, Mihalitsis and Bellwood 2019
Lutjanus	monostigma	Actinopterygii	Lutjaniformes	Lutjanidae	fusiform	FALSE	30.7	24.9	8.8	6.43	3.84							Randall 1997, Mihalitsis and Bellwood 2019
Lutjanus	purpureus	Actinopterygii	Lutjaniformes	Lutjanidae	fusiform	FALSE	59.5	45.2	15.24			3.792				FSBC 12944		Present Study
Lutjanus	rivulatus	Actinopterygii	Lutjaniformes	Lutjanidae	fusiform	FALSE	58.7	50.5	18.35	12.6	7.15							Randall 1997
Lutjanus	rivulatus	Actinopterygii	Lutjaniformes	Lutjanidae	fusiform	FALSE	78.2	63.7	23.16	16.01	10.07							Randall 1997
Lutjanus	russellii	Actinopterygii	Lutjaniformes	Lutjanidae	fusiform	FALSE	18.4	14.1	4.91	3.5	1.99							Randall 1997, Mihalitsis and Bellwood 2019
Lutjanus	russellii	Actinopterygii	Lutjaniformes	Lutjanidae	fusiform	FALSE	27.4	21.9	7.08	4.99	3.04							Randall 1997, Mihalitsis and Bellwood 2019
Lutjanus	russellii	Actinopterygii	Lutjaniformes	Lutjanidae	fusiform	FALSE	26.7	22.3	6.95	5.08	3							Randall 1997, Mihalitsis and Bellwood 2019
Lutjanus	russellii	Actinopterygii	Lutjaniformes	Lutjanidae	fusiform	FALSE	35.47	29.3	10.22	7.25	4.06							Randall 1997
Lutjanus	sanguineus	Actinopterygii	Lutjaniformes	Lutjanidae	fusiform	FALSE	58.9	46.2	16.34	10.76	6.18							Randall 1997
Lutjanus	sebae	Actinopterygii	Lutjaniformes	Lutjanidae	compressiform	FALSE	24.3	18.8	6.871	4.397	2.524							Randall 1997, Mihalitsis and Bellwood 2019
Lutjanus	sebae	Actinopterygii	Lutjaniformes	Lutjanidae	compressiform	FALSE	36.5	28.7	10.78	7.209	3.855							Randall 1997, Mihalitsis and Bellwood 2019
Lutjanus	vitta	Actinopterygii	Lutjaniformes	Lutjanidae	fusiform	FALSE	19.2	15.4	4.834	3.677	2.105						Measured to base of opercular spine	Randall 1997, Mihalitsis and Bellwood 2019
Lutjanus	vitta	Actinopterygii	Lutjaniformes	Lutjanidae	fusiform	FALSE	23.4	19	6.22	4.17	2.69						Measured to base of opercular spine	Randall 1997, Mihalitsis and Bellwood 2019
Lutjanus	vitta	Actinopterygii	Lutjaniformes	Lutjanidae	fusiform	FALSE	27.4	22.5	7.355	5.55	3.313						Measured to base of opercular spine	Randall 1997, Mihalitsis and Bellwood 2019
Paracaesio	kusakarii	Actinopterygii	Lutjaniformes	Lutjanidae	fusiform	FALSE	24	18	5.179	3.569	2.04							Bos and Gumanao 2013
Plectorhinchus	chrysotaenia	Actinopterygii	Lutjaniformes	Haemulidae	fusiform	FALSE	17.5	14.8	3.962	2.645	1.234							Randall 1997, Mihalitsis and Bellwood 2019
Plectorhinchus	chrysotaenia	Actinopterygii	Lutjaniformes	Haemulidae	fusiform	FALSE	25.5	20.7	5.608	3.558	1.731							Randall 1997, Mihalitsis and Bellwood 2019
Plectorhinchus	chubbi	Actinopterygii	Lutjaniformes	Haemulidae	fusiform	FALSE	25.2	20.5	5.975	3.953	1.859							Randall 1997, Mihalitsis and Bellwood 2019
Plectorhinchus	chubbi	Actinopterygii	Lutjaniformes	Haemulidae	fusiform	FALSE	35.6	29.8	8.495	5.264	2.676							Randall 1997, Mihalitsis and Bellwood 2019
Plectorhinchus	gaterinus	Actinopterygii	Lutjaniformes	Haemulidae	fusiform	FALSE	16.5	13.4	3.995	2.886	1.073							Randall 1997, Mihalitsis and Bellwood 2019
Plectorhinchus	gaterinus	Actinopterygii	Lutjaniformes	Haemulidae	fusiform	FALSE	27.5	22.7	6.28	4.05	1.81							Randall 1997
Plectorhinchus	gaterinus	Actinopterygii	Lutjaniformes	Haemulidae	fusiform	FALSE	27.3	22.8	6.244	4.373	2.128							Randall 1997, Mihalitsis and Bellwood 2019
Plectorhinchus	schotaf	Actinopterygii	Lutjaniformes	Haemulidae	fusiform	FALSE	25.7816	21.72	6.25536	3.58	1.93308					KAUM-I 56206		Hata et al. 2014
Plectorhinchus	schotaf	Actinopterygii	Lutjaniformes	Haemulidae	fusiform	FALSE	42.264	36	9.504		2.952					KAUM-I 56209		Hata et al. 2014
Plectorhinchus	schotaf	Actinopterygii	Lutjaniformes	Haemulidae	fusiform	FALSE	40.5885	34.81	9.57275	5.578	3.09809					KAUM-I 56899		Hata et al. 2014
Pomadasys	maculatus	Actinopterygii	Lutjaniformes	Haemulidae	fusiform	FALSE	21.48	18.8	5.18	3.38	1.34					SMF 35117		Bogorodsky et al. 2014
Pomadasys	maculatus	Actinopterygii	Lutjaniformes	Haemulidae	fusiform	FALSE	22.2	18.1	5.86	3.84	1.84							Randall 1997
Pomadasys	maculatus	Actinopterygii	Lutjaniformes	Haemulidae	fusiform	FALSE	15	12.2	3.59	2.35	1.07							Randall 1997
Pomadasys	maculatus	Actinopterygii	Lutjaniformes	Haemulidae	fusiform	FALSE	21.9	18.5	5.749	4.025	1.821							Randall 1997
Pomadasys	maculatus	Actinopterygii	Lutjaniformes	Haemulidae	fusiform	FALSE	15.195		3.84737							males		Safi et al. 2014a
Pomadasys	maculatus	Actinopterygii	Lutjaniformes	Haemulidae	fusiform	FALSE	15.247		3.9444							female		Safi et al. 2014a
Pomadasys	stridens	Actinopterygii	Lutjaniformes	Haemulidae	fusiform	FALSE	16.5336		4.2613							males		Safi et al. 2014b
Pomadasys	stridens	Actinopterygii	Lutjaniformes	Haemulidae	fusiform	FALSE	16.691		4.3881							female		Safi et al. 2014b
Rhomboplites	aurorubens	Actinopterygii	Lutjaniformes	Lutjanidae	fusiform	FALSE	42.5	34	10.812		3.638					USNM 21224a		Goode and Bean 1879a
Rhomboplites	aurorubens	Actinopterygii	Lutjaniformes	Lutjanidae	fusiform	FALSE	44.712	36	11.088	7.128	3.888					USNM 21224b		Goode and Bean 1879a
Rhomboplites	aurorubens	Actinopterygii	Lutjaniformes	Lutjanidae	fusiform	FALSE	39.78	30.6	9.792		3.366					USNM 21238		Goode and Bean 1879a
Symphorus	nematophorus	Actinopterygii	Lutjaniformes	Lutjanidae	fusiform	FALSE	57.95	48.1	14.3819	8.518	6.0606					JNU-1400		Kim et al. 2015
Chelon	labrosus	Actinopterygii	Mugiliformes	Mugilidae	fusiform	FALSE	21.6	19.4	4.5			1.9						El-Mor et al. 2020
Chelon	labrosus	Actinopterygii	Mugiliformes	Mugilidae	fusiform	FALSE	24.8	22.6	5			2.1						El-Mor et al. 2020
Crenimugil	crenilabis	Actinopterygii	Mugiliformes	Mugilidae	fusiform	FALSE	32.662	26	6.134		1.77							Randall 1997
Crenimugil	seheli	Actinopterygii	Mugiliformes	Mugilidae	fusiform	FALSE	35.5	27.3	6.12	3.72	1.33							Randall 1997
Crenimugil	seheli	Actinopterygii	Mugiliformes	Mugilidae	fusiform	FALSE	30.2	24.6	5.8	3.01	0.97							Randall 1997
Mugil	curema	Actinopterygii	Mugiliformes	Mugilidae	fusiform	FALSE	28.3	23.4	6.6	4.039		1.774				FSBC unnumbered	Species ID not completely certain. Identified as M. curema because of scales extending onto anal fin	Present Study
Mugil	curema	Actinopterygii	Mugiliformes	Mugilidae	fusiform	FALSE	28.5	22.4	5.3	3.255	1.21	1.69				FSBC unnumbered	Species ID not completely certain. Identified as M. curema because of scales extending onto anal fin	Present Study
Mugil	curema	Actinopterygii	Mugiliformes	Mugilidae	fusiform	FALSE	27.3	21.5	5.2	3.641		1.225				FSBC unnumbered	Species ID not completely certain. Identified as M. curema because of scales extending onto anal fin	Present Study
Rhinomugil	corsula	Actinopterygii	Mugiliformes	Mugilidae	fusiform	FALSE	21.56	17.73	3.9									Sultana et al. 2013
Brotula	barbata	Actinopterygii	Ophidiiformes	Ophidiidae	macruriform	FALSE	74.5		18	11.91	8.34	8.98				FSBC 11501		Present Study
Brotula	multibarbata	Actinopterygii	Ophidiiformes	Ophidiidae	macruriform	FALSE	36.7		9									Ali et al. 2021
Arapaima	gigas	Actinopterygii	Osteoglossiformes	Osteoglossidae	elongate	FALSE	190		42.4398	31.014	11.39	15.09						Scadeng et al. 2020
Arapaima	gigas	Actinopterygii	Osteoglossiformes	Osteoglossidae	elongate	FALSE	92.072	86.5	19.19	13.646	4.906	7.616				OSUM 18523-S	skeletonized specimen	Present Study
Arapaima	leptosoma	Actinopterygii	Osteoglossiformes	Osteoglossidae	elongate	FALSE	83	77.2	18.06	7.48	5.79	5.6356					Head length measured minus opercular flap	Stewart 2013
Heterotis	niloticus	Actinopterygii	Osteoglossiformes	Osteoglossidae	fusiform	FALSE	46.045	41.32	11.95	6.67	2.107					MNHN-IC-1909-0402	Head length measured minus opercular flap	MNHN online database
Heterotis	niloticus	Actinopterygii	Osteoglossiformes	Osteoglossidae	fusiform	FALSE	46.49	43.17	8.668	5.16	2.242					MNHN-IC-B-2221	Head length measured minus opercular flap	MNHN online database
Mormyrus	subundulatus	Actinopterygii	Osteoglossiformes	Mormyridae	fusiform	FALSE	27.88	24.36	6.55	4.41	0.78					CAS SU 63507		Monarch 2022
Osteoglossum	bicirrhosum	Actinopterygii	Osteoglossiformes	Osteoglossidae	elongate	FALSE	27.5819	25.211	5.259	3.257							Converted to total length using equations of Giarizzo et al. 2015.	Castro Leal and Sant-Anna 2006
Osteoglossum	ferrerai	Actinopterygii	Osteoglossiformes	Osteoglossidae	elongate	FALSE	13.274	11.963	2.425	1.655							Converted to total length using equations of Giarizzo et al. 2015, assuming Osteoglossum ferrerai and O. bichirrhosum have similar proportions	Castro Leal and Sant-Anna 2006
Scleropages	aureus	Actinopterygii	Osteoglossiformes	Osteoglossidae	fusiform	FALSE	30.59	25.57	6.14	4.39						MZB 11906	Remeasured because Pouyaud et al. reported head length to end of supraoccipital, not opercle	Pouyaud et al. 2003
Scleropages	aureus	Actinopterygii	Osteoglossiformes	Osteoglossidae	fusiform	FALSE	43.35	35.5	8.62	6.09	5.85					MZB 11911		Pouyaud et al. 2003
Scleropages	formosus	Actinopterygii	Osteoglossiformes	Osteoglossidae	fusiform	FALSE	27.43	22.538	4.868	3.611	3.492					IVPP V OP 80		Jiang-Yong and Wilson 2017
Scleropages	formosus	Actinopterygii	Osteoglossiformes	Osteoglossidae	fusiform	FALSE	31.8	26.2	6.48	4.84						MZB 11889	Remeasured because Pouyaud et al. reported head length to end of supraoccipital, not opercle	Pouyaud et al. 2003
Scleropages	leichardti	Actinopterygii	Osteoglossiformes	Osteoglossidae	fusiform	FALSE	31.622	26.759	6.213	4.525	3.54					IVPP V OP 81		Jiang-Yong and Wilson 2017
Scleropages	macrocephalus	Actinopterygii	Osteoglossiformes	Osteoglossidae	fusiform	FALSE	36.07	30.4	7.88	5.71	5.42					MZB 11900		Pouyaud et al. 2003
Scleropages	macrocephalus	Actinopterygii	Osteoglossiformes	Osteoglossidae	fusiform	FALSE	33.81	29.3	6.72	4.78	4.78					MZB 11898	Remeasured because Pouyaud et al. reported head length to end of supraoccipital, not opercle	Pouyaud et al. 2003
Abudefduf	sexfasciatus	Actinopterygii	Ovalentaria incertae sedis	Pomacentridae	compressiform	FALSE	16.2	12.3	3.264	2.071	0.894							Randall 1997
Abudefduf	sexfasciatus	Actinopterygii	Ovalentaria incertae sedis	Pomacentridae	compressiform	FALSE	17.5	13.2	3.7	2.259	1.053					BPBM 12992		Randall 1997
Abudefduf	sexfasciatus	Actinopterygii	Ovalentaria incertae sedis	Pomacentridae	compressiform	FALSE	17.5	12.5	3.694	2.285	1.011							Randall 1997
Ambassis	natalensis	Actinopterygii	Ovalentaria incertae sedis	Ambassidae	fusiform	FALSE	6.8	5.3	1.476	1.099	0.608							Randall 1997
Ogilbyina	queenslandiae	Actinopterygii	Ovalentaria incertae sedis	Pseudochromidae	fusiform	FALSE	11.9	8.6	2.8732	1.814	0.856							Randall 1997, Mihalitsis and Bellwood 2019
Ogilbyina	queenslandiae	Actinopterygii	Ovalentaria incertae sedis	Pseudochromidae	fusiform	FALSE	12.4	8.9	2.39	1.662	0.913							Randall 1997, Mihalitsis and Bellwood 2019
Ogilbyina	salvati	Actinopterygii	Ovalentaria incertae sedis	Pseudochromidae	fusiform	FALSE	7.6	5.9	1.55	1.02	0.56							Randall 1997
Parambassis	lala	Actinopterygii	Ovalentaria incertae sedis	Ambassidae	compressiform	FALSE	3.5	2.64	1									Dey et al. 2015
Pseudochromis	fuscus	Actinopterygii	Ovalentaria incertae sedis	Pseudochromidae	fusiform	FALSE	5.7	4.6	1.396	0.979	0.467							Randall 1997, Mihalitsis and Bellwood 2019
Pseudochromis	fuscus	Actinopterygii	Ovalentaria incertae sedis	Pseudochromidae	fusiform	FALSE	6.6	5.2	1.571	1.038	0.498							Randall 1997, Mihalitsis and Bellwood 2019
Pseudochromis	fuscus	Actinopterygii	Ovalentaria incertae sedis	Pseudochromidae	fusiform	FALSE	6.4	5.2	1.629	1.137	0.593							Randall 1997, Mihalitsis and Bellwood 2019
Champsodon	nudivittis	Actinopterygii	Pempheriformes	Champsodontidae	fusiform	FALSE	8.44	7.1	1.9	1.17	1.26					SMF 35063		Bogorodsky et al. 2014
Epigonus	denticulatus	Actinopterygii	Pempheriformes	Epigoniidae	fusiform	FALSE	8.1	7.25	2.27			0.61						Ergüden et al. 2017
Epigonus	denticulatus	Actinopterygii	Pempheriformes	Epigoniidae	fusiform	FALSE	12.9	11.55	3.62	2.726		0.81						Ergüden et al. 2017
Epigonus	denticulatus	Actinopterygii	Pempheriformes	Epigoniidae	fusiform	FALSE	25	16	5.41	3.226	2.31							Catarino et al. 2021
Epigonus	denticulatus	Actinopterygii	Pempheriformes	Epigoniidae	fusiform	FALSE	15.5	12.5	4.3	3.041	1.9							Ruiz-Pico et al. 2012
Epigonus	denticulatus	Actinopterygii	Pempheriformes	Epigoniidae	fusiform	FALSE	8.1	7.3	2.4		0.9							Ruiz-Pico et al. 2012
Epigonus	denticulatus	Actinopterygii	Pempheriformes	Epigoniidae	fusiform	FALSE	8.3	7.2	2.5		1							Ruiz-Pico et al. 2012
Epigonus	denticulatus	Actinopterygii	Pempheriformes	Epigoniidae	fusiform	FALSE	8.8	7.8	2.5		1							Ruiz-Pico et al. 2012
Epigonus	denticulatus	Actinopterygii	Pempheriformes	Epigoniidae	fusiform	FALSE	8.5	7.3	2.5		1							Ruiz-Pico et al. 2012
Epigonus	denticulatus	Actinopterygii	Pempheriformes	Epigoniidae	fusiform	FALSE	6.6	5.5	1.9		0.8							Ruiz-Pico et al. 2012
Epigonus	occidentalis	Actinopterygii	Pempheriformes	Epigoniidae	fusiform	FALSE	18.5	12.1991	4.92342									Paramo et al. 2017
Epigonus	occidentalis	Actinopterygii	Pempheriformes	Epigoniidae	fusiform	FALSE	19.8	15.6624	5.30706									Paramo et al. 2017
Epigonus	pandionis	Actinopterygii	Pempheriformes	Epigoniidae	fusiform	FALSE	18.2	15.2924	5.48082									Paramo et al. 2017
Epigonus	pandionis	Actinopterygii	Pempheriformes	Epigoniidae	fusiform	FALSE	17.4	14.4858	5.21342									Paramo et al. 2017
Epigonus	telecopus	Actinopterygii	Pempheriformes	Epigoniidae	fusiform	FALSE	15.667	14.5	5.32	3.19								Rafrafi-Nouira et al. 2019
Histiopterus	typus	Actinopterygii	Pempheriformes	Pentacerotidae	compressiform	FALSE	25.6	21.3	9		2							Ali et al. 2021
Pempheris	mangula	Actinopterygii	Pempheriformes	Pempheridae	compressiform	FALSE	12.82	10	3.2							URM-P 046337	Total length estimated from standard length using dimensions in Randall and Bineesh 2014	Jawad and Koeda 2013
Pempheris	mangula	Actinopterygii	Pempheriformes	Pempheridae	compressiform	FALSE	18.6396	14.7	4.3512							ZSI/CLT 2490		Randall and Bineesh 2014
Pempheris	mangula	Actinopterygii	Pempheriformes	Pempheridae	compressiform	FALSE	14.7668	11.6	3.5844							ZSI/CLT 2489		Randall and Bineesh 2014
Pempheris	mangula	Actinopterygii	Pempheriformes	Pempheridae	compressiform	FALSE	15.1158	11.8	3.54							ZSI/CLT 2489		Randall and Bineesh 2014
Pempheris	mangula	Actinopterygii	Pempheriformes	Pempheridae	compressiform	FALSE	17.476	13.6	3.9576							ZSI/CLT 2491		Randall and Bineesh 2014
Pempheris	mangula	Actinopterygii	Pempheriformes	Pempheridae	compressiform	FALSE	17.802	13.8	4.1538							ZSI/CLT 2491		Randall and Bineesh 2014
Pempheris	mangula	Actinopterygii	Pempheriformes	Pempheridae	compressiform	FALSE	18.1608	14.1	4.2864							ZSI/CLT 2491		Randall and Bineesh 2014
Pempheris	schwenkii	Actinopterygii	Pempheriformes	Pempheridae	compressiform	FALSE	15.965	12.4	3.9							URM-P 046336	Total length estimated from standard length using dimensions in Randall and Bineesh 2014	Jawad and Koeda 2013
Pempheris	schwenkii	Actinopterygii	Pempheriformes	Pempheridae	compressiform	FALSE	13.109	10.2	2.706	1.888	1.594					BPBM 18771		Randall and Bineesh 2014
Pempheris	schwenkii	Actinopterygii	Pempheriformes	Pempheridae	compressiform	FALSE	13.289	10.3	2.735	1.951	1.745					BPBM 21599		Randall and Bineesh 2014
Scombrops	oculatus	Actinopterygii	Pempheriformes	Scombropidae	fusiform	FALSE	62.8	49	17.5	13.15	7.18	5.392				FSBC 19942a		Present Study
Scombrops	oculatus	Actinopterygii	Pempheriformes	Scombropidae	fusiform	FALSE	70.5	53.5	18.5	13.97	9.69	6.189				FSBC 19942b		Present Study
Scombrops	oculatus	Actinopterygii	Pempheriformes	Scombropidae	fusiform	FALSE	91.5	71.3	25.2	17.3	12.29	7.044				FSBC 19124		Present Study
Verilus	sordidus	Actinopterygii	Pempheriformes	Acropomatidae	fusiform	FALSE	29.424	23.22	7.916	6.094	3.983					TAMAR 006		Carvalho-Filho et al. 2010
Verilus	sordidus	Actinopterygii	Pempheriformes	Acropomatidae	fusiform	FALSE	27.334	23.23	8.101	6.076	4.021					UFBA 02818		Carvalho-Filho et al. 2010
Aethaloperca	rogaa	Actinopterygii	Perciformes	Serranidae	compressiform	FALSE	33.2	27.6	8.484	5.836	4.977							Randall 1997, Mihalitsis and Bellwood 2019
Aethaloperca	rogaa	Actinopterygii	Perciformes	Serranidae	compressiform	FALSE	36.5	29.5	9.617	6.207	5.483							Randall 1997, Mihalitsis and Bellwood 2019
Anyperodon	leucogrammicus	Actinopterygii	Perciformes	Serranidae	fusiform	FALSE	29.7	24.2	9.16	6.11	4.57							Randall 1997, Mihalitsis and Bellwood 2019
Anyperodon	leucogrammicus	Actinopterygii	Perciformes	Serranidae	fusiform	FALSE	37.8	30.5	11.9391	7.752	5.512							Randall 1997, Mihalitsis and Bellwood 2019
Aulacocephalus	temminckii	Actinopterygii	Perciformes	Serranidae	fusiform	FALSE	26.5	23	8.931	6.234	3.23						Measurements may be a little off, premaxilla was protruding in the picture	Bos and Gumanao 2013
Caulolatilus	chrysops	Actinopterygii	Perciformes	Malacanthidae	fusiform	FALSE	48.75	38.5	10.927	7.66	3.85	3.596				FSBC 11806		Present Study
Caulolatilus	cyanops	Actinopterygii	Perciformes	Malacanthidae	fusiform	FALSE	38.775	33	10.22		3.8325				juvenile	USNM 4750		Goode and Bean 1878a
Caulolatilus	cyanops	Actinopterygii	Perciformes	Malacanthidae	fusiform	FALSE	63	52.2	15.589	10.1	4.79	4.207				FSBC 3351		Present Study
Caulolatilus	cyanops	Actinopterygii	Perciformes	Malacanthidae	fusiform	FALSE	66.5	53.4	14.48	9.12	4.41	3.987				FSBC 8774		Present Study
Caulolatilus	microps	Actinopterygii	Perciformes	Malacanthidae	fusiform	FALSE	71.92	62	19.32		8.625					USNM 20971		Goode and Bean 1878a
Caulolatilus	microps	Actinopterygii	Perciformes	Malacanthidae	fusiform	FALSE	54	43	14.306	9.363	4.172	3.794				FSBC 7093		Present Study
Cephalopholis	aitha	Actinopterygii	Perciformes	Serranidae	fusiform	FALSE	10.9	8.6	3.346	2.581	1.767					BPBM 32223		Randall 1997, Mihalitsis and Bellwood 2019
Cephalopholis	aitha	Actinopterygii	Perciformes	Serranidae	fusiform	FALSE	17.8	14.1	5.473	4.23	2.865							Randall 1997, Mihalitsis and Bellwood 2019
Cephalopholis	argus	Actinopterygii	Perciformes	Serranidae	fusiform	FALSE	26.2	21.2	7.41	5.49	3.93							Randall 1997, Mihalitsis and Bellwood 2019
Cephalopholis	argus	Actinopterygii	Perciformes	Serranidae	fusiform	FALSE	28.4	23.2	8.14	5.24	4.31							Randall 1997, Mihalitsis and Bellwood 2019
Cephalopholis	aurantia	Actinopterygii	Perciformes	Serranidae	fusiform	FALSE	23.06	19	6.59	4.54	3.45						Reported total lengh 28.5, but obvious lapsus	Randall 1997, Mihalitsis and Bellwood 2019
Cephalopholis	aurantia	Actinopterygii	Perciformes	Serranidae	fusiform	FALSE	24.7	19.9	7.18	5.17	3.27							Randall 1997, Mihalitsis and Bellwood 2019
Cephalopholis	aurantia	Actinopterygii	Perciformes	Serranidae	fusiform	FALSE	27.7	22.2	8.09	5.64	3.77							Randall 1997, Mihalitsis and Bellwood 2019
Cephalopholis	aurantia	Actinopterygii	Perciformes	Serranidae	fusiform	FALSE	28.7	23.5	7.86	5.94	4.1							Randall 1997, Mihalitsis and Bellwood 2019
Cephalopholis	boenak	Actinopterygii	Perciformes	Serranidae	fusiform	FALSE	14.5	11.7	3.75	2.28	2.09							Randall 1997, Mihalitsis and Bellwood 2019
Cephalopholis	boenak	Actinopterygii	Perciformes	Serranidae	fusiform	FALSE	16.5	12.9	4.31	2.83	2.3							Randall 1997, Mihalitsis and Bellwood 2019
Cephalopholis	boenak	Actinopterygii	Perciformes	Serranidae	fusiform	FALSE	16.9	13.7	4.61	3.06	2.58							Randall 1997, Mihalitsis and Bellwood 2019
Cephalopholis	boenak	Actinopterygii	Perciformes	Serranidae	fusiform	FALSE	20.9	16.5	5.54	3.55	3.02							Randall 1997, Mihalitsis and Bellwood 2019
Cephalopholis	cyanostigma	Actinopterygii	Perciformes	Serranidae	fusiform	FALSE	20.7	16.5	5.69	3.48	3.12							Randall 1997, Mihalitsis and Bellwood 2019
Cephalopholis	cyanostigma	Actinopterygii	Perciformes	Serranidae	fusiform	FALSE	11.7	9.3	3.27	1.96	1.83				juvenile			Randall 1997, Mihalitsis and Bellwood 2019
Cephalopholis	cyanostigma	Actinopterygii	Perciformes	Serranidae	fusiform	FALSE	12.7	10	3.41	2.31	1.93				juvenile			Randall 1997, Mihalitsis and Bellwood 2019
Cephalopholis	cyanostigma	Actinopterygii	Perciformes	Serranidae	fusiform	FALSE	17.6	14	4.79	3.01	2.57							Randall 1997, Mihalitsis and Bellwood 2019
Cephalopholis	cyanostigma	Actinopterygii	Perciformes	Serranidae	fusiform	FALSE	25.4	20.6	6.79	4.27	3.67							Randall 1997, Mihalitsis and Bellwood 2019
Cephalopholis	formosa	Actinopterygii	Perciformes	Serranidae	fusiform	FALSE	13.3	10.8	3.774	2.762	1.784						head length measured minus opercular flap	Randall 1997, Mihalitsis and Bellwood 2019
Cephalopholis	formosa	Actinopterygii	Perciformes	Serranidae	fusiform	FALSE	17	13.5	5.31	3.65	2.318							Randall 1997, Mihalitsis and Bellwood 2019
Cephalopholis	hemistiktos	Actinopterygii	Perciformes	Serranidae	fusiform	FALSE	15	12	4.32	2.65	2.23							Randall 1997, Mihalitsis and Bellwood 2019
Cephalopholis	hemistiktos	Actinopterygii	Perciformes	Serranidae	fusiform	FALSE	32.1	26.3	9.36	6.17	4.99							Randall 1997, Mihalitsis and Bellwood 2019
Cephalopholis	leopardus	Actinopterygii	Perciformes	Serranidae	fusiform	FALSE	10.9	8.7	3.124	2.327	1.638						head length measured minus opercular flap	Randall 1997, Mihalitsis and Bellwood 2019
Cephalopholis	leopardus	Actinopterygii	Perciformes	Serranidae	fusiform	FALSE	11.4	9.2	3.11	2.21	1.7						head length measured minus opercular flap	Randall 1997, Mihalitsis and Bellwood 2019
Cephalopholis	leopardus	Actinopterygii	Perciformes	Serranidae	fusiform	FALSE	13.8	11	4.08	2.87	2.16						head length measured minus opercular flap	Randall 1997, Mihalitsis and Bellwood 2019
Cephalopholis	leopardus	Actinopterygii	Perciformes	Serranidae	fusiform	FALSE	14	12	4.252	3.303	2.369						head length measured minus opercular flap	Randall 1997, Mihalitsis and Bellwood 2019
Cephalopholis	microprion	Actinopterygii	Perciformes	Serranidae	fusiform	FALSE	11.7	9.3	3.2	1.96	1.77							Randall 1997, Mihalitsis and Bellwood 2019
Cephalopholis	microprion	Actinopterygii	Perciformes	Serranidae	fusiform	FALSE	15.2	12.3	4.24	3.16	2.21							Randall 1997, Mihalitsis and Bellwood 2019
Cephalopholis	microprion	Actinopterygii	Perciformes	Serranidae	fusiform	FALSE	18	14.7	5.17	3.33	2.79							Randall 1997, Mihalitsis and Bellwood 2019
Cephalopholis	miniata	Actinopterygii	Perciformes	Serranidae	fusiform	FALSE	13	10.6	3.9	2.46	2.03				juvenile			Randall 1997, Mihalitsis and Bellwood 2019
Cephalopholis	miniata	Actinopterygii	Perciformes	Serranidae	fusiform	FALSE	20.3	16.5	5.59	3.69	2.88							Randall 1997, Mihalitsis and Bellwood 2019
Cephalopholis	miniata	Actinopterygii	Perciformes	Serranidae	fusiform	FALSE	24.3	20.4	7.24	4.48	3.68							Randall 1997, Mihalitsis and Bellwood 2019
Cephalopholis	miniata	Actinopterygii	Perciformes	Serranidae	fusiform	FALSE	26	21.2	7.38	4.61	4.01							Randall 1997, Mihalitsis and Bellwood 2019
Cephalopholis	miniata	Actinopterygii	Perciformes	Serranidae	fusiform	FALSE	31.8	25.4	8.21	5.35	4.11							Randall 1997, Mihalitsis and Bellwood 2019
Cephalopholis	sexmaculata	Actinopterygii	Perciformes	Serranidae	fusiform	FALSE	24.8	20	6.89	4.913	3.553							Randall 1997, Mihalitsis and Bellwood 2019
Cephalopholis	sexmaculata	Actinopterygii	Perciformes	Serranidae	fusiform	FALSE	33	25.6	9.735	7.204	5.425							Randall 1997, Mihalitsis and Bellwood 2019
Cephalopholis	sexmaculata	Actinopterygii	Perciformes	Serranidae	fusiform	FALSE	32.2	26.3	8.176	6.237	4.359							Randall 1997, Mihalitsis and Bellwood 2019
Cephalopholis	sonnerati	Actinopterygii	Perciformes	Serranidae	fusiform	FALSE	25.7	20.8	6.98	4.43	3.97							Randall 1997, Mihalitsis and Bellwood 2019
Cephalopholis	sonnerati	Actinopterygii	Perciformes	Serranidae	fusiform	FALSE	27.3	21.5	7.32	4.63	4.18							Randall 1997, Mihalitsis and Bellwood 2019
Cephalopholis	sonnerati	Actinopterygii	Perciformes	Serranidae	fusiform	FALSE	29.2	23.3	7.19	4.39	4.01							Randall 1997, Mihalitsis and Bellwood 2019
Cephalopholis	sonnerati	Actinopterygii	Perciformes	Serranidae	fusiform	FALSE	34.8	28	8.34	5.8	4.26							Randall 1997, Mihalitsis and Bellwood 2019
Cephalopholis	sonnerati	Actinopterygii	Perciformes	Serranidae	fusiform	FALSE	40.6	33	10.17	6.64	5.83							Randall 1997, Mihalitsis and Bellwood 2019
Cephalopholis	urodeta	Actinopterygii	Perciformes	Serranidae	fusiform	FALSE	15.934	13	4.319	3.371	2.234							Randall 1997, Mihalitsis and Bellwood 2019
Cephalopholis	urodeta	Actinopterygii	Perciformes	Serranidae	fusiform	FALSE	18.8	15.3	4.742	3.432	2.66							Randall 1997, Mihalitsis and Bellwood 2019
Cryodraco	antarcticus	Actinopterygii	Perciformes	Channichthyidae	fusiform	FALSE	33.8233	28.8	9.81								Total length estimated from standard length based on proportions of figured specimens	La Mesa et al. 2002
Cryodraco	atkinsoni	Actinopterygii	Perciformes	Channichthyidae	fusiform	FALSE	45.6167	39.1	12.96								Total length estimated from standard length based on proportions of figured specimens	La Mesa et al. 2002
Dermatolepis	inermis	Actinopterygii	Perciformes	Serranidae	compressiform	FALSE	59.2	45.5	15.37	9.92	5.25	4.296				FSBC 9077		Present Study
Diplectrum	formosum	Actinopterygii	Perciformes	Serranidae	fusiform	FALSE	74	56.75	18.55			8.115				FSBC 11986		Present Study
Emmelichthys	karnellai	Actinopterygii	Perciformes	Emmelichthyidae	fusiform	FALSE	30.988	25.92	6.148	4.965						URM-P 30687		Yoshino and Kon 2000
Emmelichthys	struhsakeri	Actinopterygii	Perciformes	Emmelichthyidae	fusiform	FALSE	19.168	15.2	3.588	2.823	1.1096	1.823						Randall 1997
Epinephelus	brunneus	Actinopterygii	Perciformes	Serranidae	fusiform	FALSE	67.9	59	21.0435		10.03					USNM 21336		Goode and Bean 1879a
Epinephelus	brunneus	Actinopterygii	Perciformes	Serranidae	fusiform	FALSE	73.4	65.5	24.5625		11.135					USNM 15462		Goode and Bean 1879a
Epinephelus	chlorostigma	Actinopterygii	Perciformes	Serranidae	fusiform	FALSE	36.5	29	10.087	5.709	4.402							Randall 1997, Mihalitsis and Bellwood 2019
Epinephelus	chlorostigma	Actinopterygii	Perciformes	Serranidae	fusiform	FALSE	41.1	32.7	11.467	6.996	5.337							Randall 1997, Mihalitsis and Bellwood 2019
Epinephelus	coioides	Actinopterygii	Perciformes	Serranidae	fusiform	FALSE	20.7	17.5	5.88	3.7	3.01							Randall 1997, Mihalitsis and Bellwood 2019
Epinephelus	coioides	Actinopterygii	Perciformes	Serranidae	fusiform	FALSE	24.9	19.6	7.193	4.009	3.12							Randall 1997, Mihalitsis and Bellwood 2019
Epinephelus	coioides	Actinopterygii	Perciformes	Serranidae	fusiform	FALSE	39.3	32.3	10.39	6.866	5.204							Randall 1997, Mihalitsis and Bellwood 2019
Epinephelus	coioides	Actinopterygii	Perciformes	Serranidae	fusiform	FALSE	40.3	33	11.472	7.37	5.628							Randall 1997, Mihalitsis and Bellwood 2019
Epinephelus	coioides	Actinopterygii	Perciformes	Serranidae	fusiform	FALSE	82.5	68.8	26.6397	15.235	10.764							Randall 1997, Mihalitsis and Bellwood 2019
Epinephelus	coioides	Actinopterygii	Perciformes	Serranidae	fusiform	FALSE	56	48.9	18.3									Gökoğlu and Özvarol 2015
Epinephelus	corallicola	Actinopterygii	Perciformes	Serranidae	fusiform	FALSE	18.8	14.7	4.66	2.93	2.27					BPBM 19345		Randall 1997, Mihalitsis and Bellwood 2019
Epinephelus	corallicola	Actinopterygii	Perciformes	Serranidae	fusiform	FALSE	25	19.7	6.65	3.82	2.95							Randall 1997, Mihalitsis and Bellwood 2019
Epinephelus	corallicola	Actinopterygii	Perciformes	Serranidae	fusiform	FALSE	25.2	20.1	6.8	4.28	3.1							Randall 1997, Mihalitsis and Bellwood 2019
Epinephelus	corallicola	Actinopterygii	Perciformes	Serranidae	fusiform	FALSE	29.8	23.5	8.02	4.89	3.68							Randall 1997, Mihalitsis and Bellwood 2019
Epinephelus	cruentatus	Actinopterygii	Perciformes	Serranidae	fusiform	FALSE	16.3488	13.1	5.2531		2.6462							Smith 1971
Epinephelus	cruentatus	Actinopterygii	Perciformes	Serranidae	fusiform	FALSE	17.7441	14.15	5.84395		2.9998							Smith 1971
Epinephelus	cruentatus	Actinopterygii	Perciformes	Serranidae	fusiform	FALSE	18.3015	14.7	6.0564		3.1017							Smith 1971
Epinephelus	cruentatus	Actinopterygii	Perciformes	Serranidae	fusiform	FALSE	18.5952	14.9	6.1537		3.0992							Smith 1971
Epinephelus	cruentatus	Actinopterygii	Perciformes	Serranidae	fusiform	FALSE	18.705	15	6.15		3.15							Smith 1971
Epinephelus	cruentatus	Actinopterygii	Perciformes	Serranidae	fusiform	FALSE	19.1556	15.3	6.2424		3.1518							Smith 1971
Epinephelus	cruentatus	Actinopterygii	Perciformes	Serranidae	fusiform	FALSE	19.5458	15.75	6.3945		3.3075							Smith 1971
Epinephelus	cruentatus	Actinopterygii	Perciformes	Serranidae	fusiform	FALSE	19.9502	16.05	6.59655		3.45075							Smith 1971
Epinephelus	cruentatus	Actinopterygii	Perciformes	Serranidae	fusiform	FALSE	27.4026	21.8	9.0906		5.1012							Smith 1971
Epinephelus	cruentatus	Actinopterygii	Perciformes	Serranidae	fusiform	FALSE	31.8423	25.7	10.6912		5.8596							Smith 1971
Epinephelus	drummondhayi	Actinopterygii	Perciformes	Serranidae	fusiform	FALSE	65.2	52	19.3	14.39	8.58	5.925				FSBC 7097		Present Study
Epinephelus	fasciatus	Actinopterygii	Perciformes	Serranidae	fusiform	FALSE	18.9	15.3	4.709	3.208	2.425							Randall 1997, Mihalitsis and Bellwood 2019
Epinephelus	fasciatus	Actinopterygii	Perciformes	Serranidae	fusiform	FALSE	19.2	15.5	5.185	3.131	2.684							Randall 1997, Mihalitsis and Bellwood 2019
Epinephelus	fasciatus	Actinopterygii	Perciformes	Serranidae	fusiform	FALSE	22.6	18.3	6.681	4.152	3.1							Randall 1997, Mihalitsis and Bellwood 2019
Epinephelus	fasciatus	Actinopterygii	Perciformes	Serranidae	fusiform	FALSE	25.9	21.3	6.869	5.001	3.267							Randall 1997, Mihalitsis and Bellwood 2019
Epinephelus	fasciatus	Actinopterygii	Perciformes	Serranidae	fusiform	FALSE	26.7	21.8	7.229	4.508	3.54							Randall 1997, Mihalitsis and Bellwood 2019
Epinephelus	fasciatus	Actinopterygii	Perciformes	Serranidae	fusiform	FALSE	33.057	27.16	9.102	6.128	4.667					KAUM-I 146160		Nakamura and Motomura 2022
Epinephelus	fulvus	Actinopterygii	Perciformes	Serranidae	fusiform	FALSE	13.9971	11.1	4.7952		2.2977				juvenile			Smith 1971
Epinephelus	fulvus	Actinopterygii	Perciformes	Serranidae	fusiform	FALSE	20.808	17	6.749		3.145				adult			Smith 1971
Epinephelus	fulvus	Actinopterygii	Perciformes	Serranidae	fusiform	FALSE	23.8934	19.3	7.9902		3.8407				adult			Smith 1971
Epinephelus	fulvus	Actinopterygii	Perciformes	Serranidae	fusiform	FALSE	25.3792	20.6	8.446		4.1406				adult			Smith 1971
Epinephelus	fulvus	Actinopterygii	Perciformes	Serranidae	fusiform	FALSE	25.3099	20.9	7.9002		3.8456				adult			Smith 1971
Epinephelus	fulvus	Actinopterygii	Perciformes	Serranidae	fusiform	FALSE	27.4959	22.3	8.697		4.2593				adult			Smith 1971
Epinephelus	fulvus	Actinopterygii	Perciformes	Serranidae	fusiform	FALSE	27.4067	22.3	8.697		4.3039				adult			Smith 1971
Epinephelus	fulvus	Actinopterygii	Perciformes	Serranidae	fusiform	FALSE	27.694	22.7	8.853		4.2903				adult			Smith 1971
Epinephelus	fulvus	Actinopterygii	Perciformes	Serranidae	fusiform	FALSE	27.8922	22.9	9.0455		4.5113				adult			Smith 1971
Epinephelus	fuscoguttatus	Actinopterygii	Perciformes	Serranidae	fusiform	FALSE	65	55.1	16.45	9.33	8.49							Randall 1997, Mihalitsis and Bellwood 2019
Epinephelus	guttatus	Actinopterygii	Perciformes	Serranidae	fusiform	FALSE	21.7461	17.3	7.3006						juvenile			Smith 1971
Epinephelus	guttatus	Actinopterygii	Perciformes	Serranidae	fusiform	FALSE	22.196	17.9	7.697						juvenile			Smith 1971
Epinephelus	guttatus	Actinopterygii	Perciformes	Serranidae	fusiform	FALSE	25.8543	20.7	9.108									Smith 1971
Epinephelus	guttatus	Actinopterygii	Perciformes	Serranidae	fusiform	FALSE	27.5072	22.4	9.5424									Smith 1971
Epinephelus	guttatus	Actinopterygii	Perciformes	Serranidae	fusiform	FALSE	28.3069	22.7	9.8972									Smith 1971
Epinephelus	guttatus	Actinopterygii	Perciformes	Serranidae	fusiform	FALSE	28.2036	22.8	9.804									Smith 1971
Epinephelus	guttatus	Actinopterygii	Perciformes	Serranidae	fusiform	FALSE	30.2088	24.6	10.209									Smith 1971
Epinephelus	guttatus	Actinopterygii	Perciformes	Serranidae	fusiform	FALSE	33.2384	27.2	11.2608									Smith 1971
Epinephelus	guttatus	Actinopterygii	Perciformes	Serranidae	fusiform	FALSE	36.1131	29.1	12.2511									Smith 1971
Epinephelus	guttatus	Actinopterygii	Perciformes	Serranidae	fusiform	FALSE	46.17	38	16.302									Smith 1971
Epinephelus	hexagonatus	Actinopterygii	Perciformes	Serranidae	fusiform	FALSE	19.3	15.6	4.82	3.01	2.65							Randall 1997, Mihalitsis and Bellwood 2019
Epinephelus	hexagonatus	Actinopterygii	Perciformes	Serranidae	fusiform	FALSE	19.6	16	5	3.07	2.85							Randall 1997, Mihalitsis and Bellwood 2019
Epinephelus	itajara	Actinopterygii	Perciformes	Serranidae	fusiform	FALSE	206.498	160.2	55.269		27.0738					UMMZ 174398-S		Smith 1971
Epinephelus	itajara	Actinopterygii	Perciformes	Serranidae	fusiform	FALSE	113.7	93.8	27.23	17.15	12.56				adult			Francesconi and Schwartz 2000
Epinephelus	itajara	Actinopterygii	Perciformes	Serranidae	fusiform	FALSE	64.4	50.7	17.2	10.16	5.52	7.608				FSBC 12632		Present Study
Epinephelus	lanceolatus	Actinopterygii	Perciformes	Serranidae	fusiform	FALSE	40.5	31.5	10.846	4.174	4.455							Sureandiran et al. 2020
Epinephelus	maculatus	Actinopterygii	Perciformes	Serranidae	fusiform	FALSE	27.7	22.4	8.1389	4.42	3.56							Randall 1997, Mihalitsis and Bellwood 2019
Epinephelus	maculatus	Actinopterygii	Perciformes	Serranidae	fusiform	FALSE	32.8	26.3	9.6578	4.71	4.21							Randall 1997, Mihalitsis and Bellwood 2019
Epinephelus	maculatus	Actinopterygii	Perciformes	Serranidae	fusiform	FALSE	35.6	29.1	9.5	5.85	3.96							Randall 1997, Mihalitsis and Bellwood 2019
Epinephelus	malabaricus	Actinopterygii	Perciformes	Serranidae	fusiform	FALSE	37.3	30.9	10.42	7.29	4.85						head length calculated minus opercular flap	Randall 1997, Mihalitsis and Bellwood 2019
Epinephelus	malabaricus	Actinopterygii	Perciformes	Serranidae	fusiform	FALSE	39.5	31.7	12.5138	7.28	5.2						head length calculated minus opercular flap	Randall 1997, Mihalitsis and Bellwood 2019
Epinephelus	malabaricus	Actinopterygii	Perciformes	Serranidae	fusiform	FALSE	40.7	32.8	11.71	8.08	5.67						head length calculated minus opercular flap	Randall 1997, Mihalitsis and Bellwood 2019
Epinephelus	malabaricus	Actinopterygii	Perciformes	Serranidae	fusiform	FALSE	63.5	51	20.37	13.6	9.73						head length calculated minus opercular flap	Randall 1997, Mihalitsis and Bellwood 2019
Epinephelus	malabaricus	Actinopterygii	Perciformes	Serranidae	fusiform	FALSE	71.4	58.4	20.02	13.4	9.89						head length calculated minus opercular flap	Randall 1997, Mihalitsis and Bellwood 2019
Epinephelus	marginatus	Actinopterygii	Perciformes	Serranidae	fusiform	FALSE	40.49	34	12.18	7.74	5.97							Randall 1997, Mihalitsis and Bellwood 2019
Epinephelus	marginatus	Actinopterygii	Perciformes	Serranidae	fusiform	FALSE	46.5	38.3	13.03	8.74	6.23							Randall 1997, Mihalitsis and Bellwood 2019
Epinephelus	marginatus	Actinopterygii	Perciformes	Serranidae	fusiform	FALSE	56.8	40.4	15.95	12.24	7.99							Randall 1997, Mihalitsis and Bellwood 2019
Epinephelus	merra	Actinopterygii	Perciformes	Serranidae	fusiform	FALSE	11.4	9.3	3.6112	2.09	1.63				juvenile			Randall 1997, Mihalitsis and Bellwood 2019
Epinephelus	merra	Actinopterygii	Perciformes	Serranidae	fusiform	FALSE	22.1	17.6	5.81	3.68	3.02							Randall 1997, Mihalitsis and Bellwood 2019
Epinephelus	morio	Actinopterygii	Perciformes	Serranidae	fusiform	FALSE	31.4001	25.1	10.2408									Smith 1971
Epinephelus	morio	Actinopterygii	Perciformes	Serranidae	fusiform	FALSE	32.1468	25.8	10.6038									Smith 1971
Epinephelus	morio	Actinopterygii	Perciformes	Serranidae	fusiform	FALSE	32.76	26	10.712									Smith 1971
Epinephelus	morio	Actinopterygii	Perciformes	Serranidae	fusiform	TRUE	76.75	62	22	16.45	11.16	7.839				FSBC 1701		Present Study
Epinephelus	morio	Actinopterygii	Perciformes	Serranidae	fusiform	FALSE	71.5	57	20.3	12.85	6.9	7.158				FSBC 2457		Present Study
Epinephelus	ongus	Actinopterygii	Perciformes	Serranidae	fusiform	FALSE	11.4	9.4	3.62	2.42	1.71							Randall 1997, Mihalitsis and Bellwood 2019
Epinephelus	ongus	Actinopterygii	Perciformes	Serranidae	fusiform	FALSE	14	11.4	4.42	3.03	2.08							Randall 1997, Mihalitsis and Bellwood 2019
Epinephelus	ongus	Actinopterygii	Perciformes	Serranidae	fusiform	FALSE	27.2	22.2	7.73	5.32	3.53							Randall 1997, Mihalitsis and Bellwood 2019
Epinephelus	panamensis	Actinopterygii	Perciformes	Serranidae	fusiform	FALSE	7.9002	6.3	2.4507		1.1466							Smith 1971
Epinephelus	panamensis	Actinopterygii	Perciformes	Serranidae	fusiform	FALSE	9.5025	7.5	3.0975		1.4475							Smith 1971
Epinephelus	panamensis	Actinopterygii	Perciformes	Serranidae	fusiform	FALSE	10.6489	8.3	3.4528		1.6019							Smith 1971
Epinephelus	panamensis	Actinopterygii	Perciformes	Serranidae	fusiform	FALSE	10.6512	8.4	3.3516		1.554							Smith 1971
Epinephelus	panamensis	Actinopterygii	Perciformes	Serranidae	fusiform	FALSE	15.2028	12.3	4.797		2.4477							Smith 1971
Epinephelus	panamensis	Actinopterygii	Perciformes	Serranidae	fusiform	FALSE	17.6558	14.25	5.8995		3.00675							Smith 1971
Epinephelus	panamensis	Actinopterygii	Perciformes	Serranidae	fusiform	FALSE	18.696	15.2	6.2016		3.1008							Smith 1971
Epinephelus	panamensis	Actinopterygii	Perciformes	Serranidae	fusiform	FALSE	19.065	15.5	6.2465		3.193							Smith 1971
Epinephelus	panamensis	Actinopterygii	Perciformes	Serranidae	fusiform	FALSE	21.7002	17.7	7.0977		3.7524							Smith 1971
Epinephelus	panamensis	Actinopterygii	Perciformes	Serranidae	fusiform	FALSE	25.3344	20.8	8.5904		4.4928							Smith 1971
Epinephelus	polyphekadion	Actinopterygii	Perciformes	Serranidae	fusiform	FALSE	31.3	25	8.14	5.1	4.24							Randall 1997, Mihalitsis and Bellwood 2019
Epinephelus	polyphekadion	Actinopterygii	Perciformes	Serranidae	fusiform	FALSE	49.3	40.8	14.24	9.01	7.04							Randall 1997, Mihalitsis and Bellwood 2019
Epinephelus	quoyanus	Actinopterygii	Perciformes	Serranidae	fusiform	FALSE	22.9	18.1	5.94	3.45	2.96							Randall 1997, Mihalitsis and Bellwood 2019
Epinephelus	quoyanus	Actinopterygii	Perciformes	Serranidae	fusiform	FALSE	24.2	19.2	7.4	4.05	3.4							Randall 1997, Mihalitsis and Bellwood 2019
Epinephelus	quoyanus	Actinopterygii	Perciformes	Serranidae	fusiform	FALSE	29.2	22.5	6.93	3.98	3.26							Randall 1997, Mihalitsis and Bellwood 2019
Epinephelus	quoyanus	Actinopterygii	Perciformes	Serranidae	fusiform	FALSE	32.5	25.5	8.88	5.04	4.22							Randall 1997, Mihalitsis and Bellwood 2019
Epinephelus	striatus	Actinopterygii	Perciformes	Serranidae	fusiform	FALSE	5.86615	4.558	1.93715						juvenile			Smith 1971
Epinephelus	striatus	Actinopterygii	Perciformes	Serranidae	fusiform	FALSE	19.9068	15.9	6.3918						juvenile			Smith 1971
Epinephelus	striatus	Actinopterygii	Perciformes	Serranidae	fusiform	FALSE	21.1008	16.8	6.804						juvenile			Smith 1971
Epinephelus	striatus	Actinopterygii	Perciformes	Serranidae	fusiform	FALSE	22	17.6	7.3568						juvenile			Smith 1971
Epinephelus	striatus	Actinopterygii	Perciformes	Serranidae	fusiform	FALSE	30.0045	24.1	9.6882						juvenile			Smith 1971
Epinephelus	striatus	Actinopterygii	Perciformes	Serranidae	fusiform	FALSE	30.3952	24.2	9.7042						juvenile			Smith 1971
Epinephelus	striatus	Actinopterygii	Perciformes	Serranidae	fusiform	FALSE	31.5256	25.1	10.3914						juvenile			Smith 1971
Epinephelus	striatus	Actinopterygii	Perciformes	Serranidae	fusiform	FALSE	31.4198	25.4	10.3886						juvenile			Smith 1971
Epinephelus	striatus	Actinopterygii	Perciformes	Serranidae	fusiform	FALSE	40.0843	32.3	12.9846									Smith 1971
Epinephelus	striatus	Actinopterygii	Perciformes	Serranidae	fusiform	FALSE	40.8028	33.2	12.9148									Smith 1971
Epinephelus	striatus	Actinopterygii	Perciformes	Serranidae	fusiform	FALSE	69.7	56	20.9	15.5	10.56	5.753				FSBC 24226		Present Study
Epinephelus	summana	Actinopterygii	Perciformes	Serranidae	fusiform	FALSE	41.3	33.4	11.33	6.86	5.05							Randall 1997
Epinephelus	summana	Actinopterygii	Perciformes	Serranidae	fusiform	FALSE	19.4	15.2	4.48	3.03	1.83							Randall 1997
Epinephelus	tauvina	Actinopterygii	Perciformes	Serranidae	fusiform	FALSE	22.1	18.2	7.31	4.52	3.73				juvenile			Randall 1997, Mihalitsis and Bellwood 2019
Epinephelus	tauvina	Actinopterygii	Perciformes	Serranidae	fusiform	FALSE	23.8	19.2	6.37	4.37	3.45				juvenile			Randall 1997, Mihalitsis and Bellwood 2019
Epinephelus	tauvina	Actinopterygii	Perciformes	Serranidae	fusiform	FALSE	31	25.2	8.47	5.39	4.82							Randall 1997, Mihalitsis and Bellwood 2019
Epinephelus	tauvina	Actinopterygii	Perciformes	Serranidae	fusiform	FALSE	38.4	31	11.7	8.94	6.69						Head length calculated minus opercular flap	Randall 1997, Mihalitsis and Bellwood 2019
Epinephelus	tauvina	Actinopterygii	Perciformes	Serranidae	fusiform	FALSE	49.5	40.7	15.09	8.61	8.17							Randall 1997, Mihalitsis and Bellwood 2019
Etheostoma	caeruleum	Actinopterygii	Perciformes	Percidae	fusiform	FALSE	5.386	4.462	1.173	0.951	0.334	0.347				CMNH 18383		Present Study
Etheostoma	caeruleum	Actinopterygii	Perciformes	Percidae	fusiform	FALSE	5.157	4.53	1.14	0.854	0.337	0.289				CMNH 340		Present Study
Etheostoma	caeruleum	Actinopterygii	Perciformes	Percidae	fusiform	FALSE	5.336	4.533	1.117	0.797	0.296	0.282				CMNH 9450a		Present Study
Etheostoma	caeruleum	Actinopterygii	Perciformes	Percidae	fusiform	FALSE	5.345	4.672	1.166	0.84	0.324	0.268				CMNH 9450b		Present Study
Etheostoma	caeruleum	Actinopterygii	Perciformes	Percidae	fusiform	FALSE	3.463	2.919	0.74	0.575	0.196	0.189			juvenile	CMNH 9450c		Present Study
Etheostoma	caeruleum	Actinopterygii	Perciformes	Percidae	fusiform	FALSE	5.032	4.382	1.037	0.815	0.306	0.336				CMNH 8921		Present Study
Etheostoma	caeruleum	Actinopterygii	Perciformes	Percidae	fusiform	FALSE	4.491	3.836	0.995	0.74	0.275	0.263				CMNH		Present Study
Etheostoma	caeruleum	Actinopterygii	Perciformes	Percidae	fusiform	FALSE	3.97	3.26	0.887	0.625	0.26	0.201			juvenile	CMNH 8493a		Present Study
Etheostoma	caeruleum	Actinopterygii	Perciformes	Percidae	fusiform	FALSE	3.811	3.299	0.83	0.616	0.213	0.174			juvenile	CMNH 8493b		Present Study
Etheostoma	caeruleum	Actinopterygii	Perciformes	Percidae	fusiform	FALSE	3.519	3.016	0.725	0.617	0.242	0.174			juvenile	CMNH 9478a		Present Study
Etheostoma	caeruleum	Actinopterygii	Perciformes	Percidae	fusiform	FALSE	3.731	3.19	0.777	0.63	0.231	0.194			juvenile	CMNH 9478b		Present Study
Etheostoma	caeruleum	Actinopterygii	Perciformes	Percidae	fusiform	FALSE	2.763	2.382	0.652	0.484	0.211	0.143			juvenile	CMNH 9469a		Present Study
Etheostoma	caeruleum	Actinopterygii	Perciformes	Percidae	fusiform	FALSE	3.193	2.663	0.744	0.566	0.197	0.171			juvenile	CMNH 9469b		Present Study
Etheostoma	nigrum	Actinopterygii	Perciformes	Percidae	fusiform	FALSE	4.665	3.926	0.963	0.694	0.26	0.32				CMNH 6428		Present Study
Etheostoma	nigrum	Actinopterygii	Perciformes	Percidae	fusiform	FALSE	4.84	4.046	0.948	0.727	0.257	0.313				CMNH 6927		Present Study
Etheostoma	nigrum	Actinopterygii	Perciformes	Percidae	fusiform	FALSE	4.561	3.834	0.865	0.699	0.264	0.299				CMNH 6934		Present Study
Etheostoma	nigrum	Actinopterygii	Perciformes	Percidae	fusiform	FALSE	4.663	3.87	0.835	0.624	0.24	0.287				CMNH 1206		Present Study
Etheostoma	nigrum	Actinopterygii	Perciformes	Percidae	fusiform	FALSE	4.064	3.45	0.803	0.626	0.232	0.252				CMNH 11169a		Present Study
Etheostoma	nigrum	Actinopterygii	Perciformes	Percidae	fusiform	FALSE	4.276	3.637	0.826	0.605	0.247	0.235				CMNH 11169b		Present Study
Etheostoma	nigrum	Actinopterygii	Perciformes	Percidae	fusiform	FALSE	4.899	4.197	0.935	0.728	0.25	0.26				CMNH 11169c		Present Study
Etheostoma	nigrum	Actinopterygii	Perciformes	Percidae	fusiform	FALSE	4.291	3.585	0.804	0.613	0.242	0.237				CMNH 696		Present Study
Etheostoma	nigrum	Actinopterygii	Perciformes	Percidae	fusiform	FALSE	4.313	3.702	0.886	0.609	0.238	0.239				CMNH 9437		Present Study
Hyporthodus	flavolimbatus	Actinopterygii	Perciformes	Serranidae	fusiform	FALSE	10.1994	8.05	3.50175						juvenile			Smith 1971
Hyporthodus	flavolimbatus	Actinopterygii	Perciformes	Serranidae	fusiform	FALSE	12.4047	9.9	4.1976						juvenile			Smith 1971
Hyporthodus	flavolimbatus	Actinopterygii	Perciformes	Serranidae	fusiform	FALSE	12.8023	10.25	4.346						juvenile			Smith 1971
Hyporthodus	flavolimbatus	Actinopterygii	Perciformes	Serranidae	fusiform	FALSE	14.7023	11.65	4.99785						juvenile			Smith 1971
Hyporthodus	flavolimbatus	Actinopterygii	Perciformes	Serranidae	fusiform	FALSE	16.902	13.5	5.697						juvenile			Smith 1971
Hyporthodus	flavolimbatus	Actinopterygii	Perciformes	Serranidae	fusiform	FALSE	36.2502	29.4	12.495									Smith 1971
Hyporthodus	flavolimbatus	Actinopterygii	Perciformes	Serranidae	fusiform	FALSE	41.6631	33.9	14.2041									Smith 1971
Hyporthodus	flavolimbatus	Actinopterygii	Perciformes	Serranidae	fusiform	FALSE	57.904	47	19.505									Smith 1971
Hyporthodus	flavolimbatus	Actinopterygii	Perciformes	Serranidae	fusiform	FALSE	76.6238	63.8	24.882									Smith 1971
Hyporthodus	mystacinus	Actinopterygii	Perciformes	Serranidae	fusiform	FALSE	43	33.5	14	10.05	6.09	5.46				FSBC unnumbered		Present Study
Hyporthodus	nigritus	Actinopterygii	Perciformes	Serranidae	fusiform	FALSE	6.1446	4.9	2.0972						juvenile		Otolith data indicate that individuals of this size are < 2 years old and therefore probably immature (Sanches and Rooker 2021)	Smith 1971
Hyporthodus	nigritus	Actinopterygii	Perciformes	Serranidae	fusiform	FALSE	7.006	5.65	2.4521						juvenile		Otolith data indicate that individuals of this size are < 2 years old and therefore probably immature (Sanches and Rooker 2021)	Smith 1971
Hyporthodus	nigritus	Actinopterygii	Perciformes	Serranidae	fusiform	FALSE	8.4728	6.8	2.9512						juvenile		Otolith data indicate that individuals of this size are < 2 years old and therefore probably immature (Sanches and Rooker 2021)	Smith 1971
Hyporthodus	nigritus	Actinopterygii	Perciformes	Serranidae	fusiform	FALSE	8.903	7.25	3.05225						juvenile		Otolith data indicate that individuals of this size are < 2 years old and therefore probably immature (Sanches and Rooker 2021)	Smith 1971
Hyporthodus	nigritus	Actinopterygii	Perciformes	Serranidae	fusiform	FALSE	17.0154	13.7	6.2061						juvenile		Otolith data indicate that individuals of this size are < 2 years old and therefore probably immature (Sanches and Rooker 2021)	Smith 1971
Hyporthodus	nigritus	Actinopterygii	Perciformes	Serranidae	fusiform	FALSE	19.1735	15.5	7.006						juvenile		Otolith data indicate that individuals of this size are < 2 years old and therefore probably immature (Sanches and Rooker 2021)	Smith 1971
Hyporthodus	nigritus	Actinopterygii	Perciformes	Serranidae	fusiform	FALSE	22.644	18.5	8.6025						juvenile		Otolith data indicate that individuals of this size are < 2 years old and therefore probably immature (Sanches and Rooker 2021)	Smith 1971
Hyporthodus	nigritus	Actinopterygii	Perciformes	Serranidae	fusiform	FALSE	35.177	29	12.412						juvenile		Otolith data indicate that individuals of this size are < 2 years old and therefore probably immature (Sanches and Rooker 2021)	Smith 1971
Hyporthodus	nigritus	Actinopterygii	Perciformes	Serranidae	fusiform	FALSE	49.3656	40.2	16.683									Smith 1971
Hyporthodus	nigritus	Actinopterygii	Perciformes	Serranidae	fusiform	FALSE	69.8625	57.5	23.115									Smith 1971
Hyporthodus	nigritus	Actinopterygii	Perciformes	Serranidae	fusiform	FALSE	73.5	61	24.4	17.69	11.895					USNM 21329		Goode and Bean 1878c
Hyporthodus	nigritus	Actinopterygii	Perciformes	Serranidae	fusiform	FALSE	61	48	18	15.61	9.71	7.39				FSBC 12003		Present Study
Hyporthodus	niveatus	Actinopterygii	Perciformes	Serranidae	fusiform	FALSE	98	81	27.07	19.15	12.72					AMNH 20230		Smith 1971
Hyporthodus	octofasciatus	Actinopterygii	Perciformes	Serranidae	fusiform	FALSE	31.067	25.13	8.93	6.117	4.319					KAUM-I 78728		Nakamura and Motomura 2022
Hyporthodus	septemfasciatus	Actinopterygii	Perciformes	Serranidae	fusiform	FALSE	45.917	37.5	12.537	8.109	6.046					KAUM-I 78727		Nakamura and Motomura 2022
Luzonichthys	waitei	Actinopterygii	Perciformes	Serranidae	fusiform	FALSE	6.1	4.8	1.36	0.73	0.6					BPBM 22041		Randall 1997
Mycteroperca	interstitialis	Actinopterygii	Perciformes	Serranidae	fusiform	FALSE	69.4	53.9	19.404	12.936	8.80187					USNM 22236		Goode and Bean 1879c
Mycteroperca	interstitialis	Actinopterygii	Perciformes	Serranidae	fusiform	FALSE	65.4	51.3	15.5			8.038				FSBC 7686		Present Study
Mycteroperca	interstitialis	Actinopterygii	Perciformes	Serranidae	fusiform	FALSE	57	41.7	14.84	11.15	8.18	4.375				FSBC 12022		Present Study
Mycteroperca	tigris	Actinopterygii	Perciformes	Serranidae	fusiform	FALSE	60.2	53.6	20.6	14.126	10.037	7.122				FSBC 11990		Present Study
Mycteroperca	venenosa	Actinopterygii	Perciformes	Serranidae	fusiform	FALSE	19.186	15.6	5.8968									Smith 1971
Mycteroperca	venenosa	Actinopterygii	Perciformes	Serranidae	fusiform	FALSE	21.0465	17.2	6.2952									Smith 1971
Mycteroperca	venenosa	Actinopterygii	Perciformes	Serranidae	fusiform	FALSE	23.9535	19.7	7.3481									Smith 1971
Mycteroperca	venenosa	Actinopterygii	Perciformes	Serranidae	fusiform	FALSE	24.3023	20	7.6									Smith 1971
Mycteroperca	venenosa	Actinopterygii	Perciformes	Serranidae	fusiform	FALSE	25.9302	21.4	7.7468									Smith 1971
Mycteroperca	venenosa	Actinopterygii	Perciformes	Serranidae	fusiform	FALSE	27.2093	22.5	8.3925									Smith 1971
Mycteroperca	venenosa	Actinopterygii	Perciformes	Serranidae	fusiform	FALSE	30.5814	25.4	8.9916									Smith 1971
Mycteroperca	venenosa	Actinopterygii	Perciformes	Serranidae	fusiform	FALSE	38.3721	32.1	11.1066									Smith 1971
Mycteroperca	venenosa	Actinopterygii	Perciformes	Serranidae	fusiform	FALSE	39.0698	32.7	11.6085									Smith 1971
Mycteroperca	venenosa	Actinopterygii	Perciformes	Serranidae	fusiform	FALSE	57.907	48.9	17.5062									Smith 1971
Mycteroperca	venenosa	Actinopterygii	Perciformes	Serranidae	fusiform	FALSE	89.5	69	23.5	16.47	11.27	8.384				FSBC 11631		Present Study
Niphon	spinosus	Actinopterygii	Perciformes	Serranidae	fusiform	FALSE	48.329	42.2	14.984	10.789	5.839					KAUM-I 67749		Nakamura and Motomura 2022
Paracirrhites	forsteri	Actinopterygii	Perciformes	Cirrhitidae	fusiform	FALSE	8	6.7	2.033	1.37	0.87							Randall 1997, Mihalitsis and Bellwood 2019
Paracirrhites	forsteri	Actinopterygii	Perciformes	Cirrhitidae	fusiform	FALSE	9	7.5	2.509	1.664	1.021							Randall 1997, Mihalitsis and Bellwood 2019
Paracirrhites	forsteri	Actinopterygii	Perciformes	Cirrhitidae	fusiform	FALSE	13	10.5	3.289	2.252	1.339							Randall 1997, Mihalitsis and Bellwood 2019
Paracirrhites	forsteri	Actinopterygii	Perciformes	Cirrhitidae	fusiform	FALSE	14	11.6	3.509	2.348	1.504							Randall 1997, Mihalitsis and Bellwood 2019
Paracirrhites	forsteri	Actinopterygii	Perciformes	Cirrhitidae	fusiform	FALSE	19	15.6	4.9249	3.35	1.91							Randall 1997, Mihalitsis and Bellwood 2019
Paracirrhites	hemistictus	Actinopterygii	Perciformes	Cirrhitidae	fusiform	FALSE	20.8	17.4	4.599	3.352	1.951							Randall 1997, Mihalitsis and Bellwood 2019
Paracirrhites	hemistictus	Actinopterygii	Perciformes	Cirrhitidae	fusiform	FALSE	22.6	19.2	5.466	3.999	2.376							Randall 1997, Mihalitsis and Bellwood 2019
Paranthias	furcifer	Actinopterygii	Perciformes	Serranidae	fusiform	FALSE	19.5014	14.05	4.2431		1.75625					ANSP 27151		Smith 1971
Paranthias	furcifer	Actinopterygii	Perciformes	Serranidae	fusiform	FALSE	21.2004	15.6	4.6956		1.9032					ANSP 27152		Smith 1971
Paranthias	furcifer	Actinopterygii	Perciformes	Serranidae	fusiform	FALSE	22.7472	16.8	4.9056		1.9488					ANSP 27153		Smith 1971
Paranthias	furcifer	Actinopterygii	Perciformes	Serranidae	fusiform	FALSE	27.8558	19.7	5.4963		2.1473					UMMZ unlisted		Smith 1971
Paranthias	furcifer	Actinopterygii	Perciformes	Serranidae	fusiform	FALSE	31.099	22.7	5.9928		2.3608					UMMZ unlisted		Smith 1971
Paranthias	furcifer	Actinopterygii	Perciformes	Serranidae	fusiform	FALSE	30.5996	22.7	6.4468		2.4516					UMMZ unlisted		Smith 1971
Paranthias	furcifer	Actinopterygii	Perciformes	Serranidae	fusiform	FALSE	35.8015	26.5	6.89		2.597					UMMZ unlisted		Smith 1971
Paranthias	furcifer	Actinopterygii	Perciformes	Serranidae	fusiform	FALSE	30.92	27.3	7.2618		2.8119					UMMZ unlisted		Smith 1971
Paranthias	furcifer	Actinopterygii	Perciformes	Serranidae	fusiform	FALSE	36.245	27.5	7.645		2.8875					UMMZ unlisted		Smith 1971
Parapercis	maculata	Actinopterygii	Perciformes	Pinguipedidae	fusiform	FALSE	11.81	10.2	2.85	2.03	1.15					SMF 35064		Bogorodsky et al. 2014
Percina	caprodes	Actinopterygii	Perciformes	Percidae	fusiform	FALSE	11.5	10	2.584	1.833	0.741	0.543				CMNH 5224a		Present Study
Percina	caprodes	Actinopterygii	Perciformes	Percidae	fusiform	FALSE	7.815	6.708	1.709	1.247	0.4	0.35				CMNH 5224b		Present Study
Percina	caprodes	Actinopterygii	Perciformes	Percidae	fusiform	FALSE	11.133	9.441	2.47	1.806	0.792	0.479				CMNH 5224c		Present Study
Percina	caprodes	Actinopterygii	Perciformes	Percidae	fusiform	FALSE	8.632	7.482	1.952	1.38	0.55	0.418				CMNH 5224d		Present Study
Percina	caprodes	Actinopterygii	Perciformes	Percidae	fusiform	FALSE	8.953	7.66	1.948	1.409	0.554	0.376				CMNH 5224e		Present Study
Plectropomus	areolatus	Actinopterygii	Perciformes	Serranidae	fusiform	FALSE	38.3	31.6	9.267	6.072	4.358							Randall 1997, Mihalitsis and Bellwood 2019
Plectropomus	areolatus	Actinopterygii	Perciformes	Serranidae	fusiform	FALSE	42.7	35	11.165	7.404	4.984							Randall 1997, Mihalitsis and Bellwood 2019
Plectropomus	areolatus	Actinopterygii	Perciformes	Serranidae	fusiform	FALSE	43.981	37.4	12.4907	8.016	5.511					BPBM 20404		Randall 1997, Mihalitsis and Bellwood 2019
Plectropomus	laevis	Actinopterygii	Perciformes	Serranidae	fusiform	FALSE	12.7	10.8	3.49	2.4	1.67				juvenile			Randall 1997, Mihalitsis and Bellwood 2019
Plectropomus	laevis	Actinopterygii	Perciformes	Serranidae	fusiform	FALSE	21.8	17.5	5.8994	4.003	2.519							Randall 1997, Mihalitsis and Bellwood 2019
Plectropomus	laevis	Actinopterygii	Perciformes	Serranidae	fusiform	FALSE	59.9	47.5	14.81	10.45	7.18							Randall 1997, Mihalitsis and Bellwood 2019
Plectropomus	laevis	Actinopterygii	Perciformes	Serranidae	fusiform	FALSE	65.2	53.4	16.792	11.477	8.102							Randall 1997, Mihalitsis and Bellwood 2019
Plectropomus	laevis	Actinopterygii	Perciformes	Serranidae	fusiform	FALSE	75.29	59.7	18.695	12.35	8.413							Randall 1997, Mihalitsis and Bellwood 2019
Plectropomus	leopardus	Actinopterygii	Perciformes	Serranidae	fusiform	FALSE	26.5	20.8	6.836	4.632	3.195							Randall 1997, Mihalitsis and Bellwood 2019
Plectropomus	oligacanthus	Actinopterygii	Perciformes	Serranidae	fusiform	FALSE	29.5	24.1	7.796	4.837	3.092					BPBM 16200		Randall 1997, Mihalitsis and Bellwood 2019
Plectropomus	punctatus	Actinopterygii	Perciformes	Serranidae	fusiform	FALSE	53.5	44.6	12.697	8.318	6.042					BPBM 21668		Randall 1997, Mihalitsis and Bellwood 2019
Polyprion	americanus	Actinopterygii	Perciformes	Polyprionidae	fusiform	FALSE	81.2	68	26.7	16.612	11.572	3.536				FSBC 19840		Present Study
Pomatomus	saltatrix	Actinopterygii	Perciformes	Pomatomidae	fusiform	FALSE	41	33	9.398	7.463		2.301				OSUM 5237a		Present Study
Pomatomus	saltatrix	Actinopterygii	Perciformes	Pomatomidae	fusiform	FALSE	38.2	30.7	9.366	7.183		2.021				OSUM 5237b		Present Study
Pomatomus	saltatrix	Actinopterygii	Perciformes	Pomatomidae	fusiform	FALSE	37.3	30	9.426	7.417		2.163				OSUM 5237c		Present Study
Pomatomus	saltatrix	Actinopterygii	Perciformes	Pomatomidae	fusiform	FALSE	36.8	30	9.11	7.22		2.196				OSUM 5237d		Present Study
Pomatomus	saltatrix	Actinopterygii	Perciformes	Pomatomidae	fusiform	FALSE	39.5	32	9.397	7.101		2.15				OSUM 5237e		Present Study
Pomatomus	saltatrix	Actinopterygii	Perciformes	Pomatomidae	fusiform	FALSE	45.873	38.563	8.92	6.354	4.085							Virginia Institute of Science 2017
Pseudanthias	fasciatus	Actinopterygii	Perciformes	Serranidae	fusiform	FALSE	14.4	8.7	2.248		1.18							Bos and Gumanao 2013
Sacura	boulengeri	Actinopterygii	Perciformes	Serranidae	compressiform	FALSE	15.564	10.382	3.95554	2.497	1.902							Thomas et al. 2008, Bineesh et al. 2012
Sacura	boulengeri	Actinopterygii	Perciformes	Serranidae	compressiform	FALSE	18.608	13.474	5.92856	3.286	2.481							Thomas et al. 2008, Bineesh et al. 2012
Sacura	boulengeri	Actinopterygii	Perciformes	Serranidae	compressiform	FALSE	23.585	17.5	6.79	3.429								Bineesh et al. 2012
Saloptia	powelli	Actinopterygii	Perciformes	Serranidae	fusiform	FALSE	48	39	14.647	10.486	6.25							Bos and Gumanao 2013
Saloptia	powelli	Actinopterygii	Perciformes	Serranidae	fusiform	FALSE	46	38.8	13.305	9.656	5.965							Randall 1997
Sander	canadense	Actinopterygii	Perciformes	Percidae	fusiform	FALSE	36.7	32	9.132	6.572		3.115				OSUM 1852		Present Study
Sander	canadense	Actinopterygii	Perciformes	Percidae	fusiform	FALSE	40.7	35	9.452	6.858		3.479				OSUM 14529		Present Study
Sander	canadense	Actinopterygii	Perciformes	Percidae	fusiform	FALSE	38	32	8.778	5.383		3.409				OSUM 1167		Present Study
Sander	canadense	Actinopterygii	Perciformes	Percidae	fusiform	FALSE	33.4	27	7.812	9.453	3.82	2.851				OSUM 78280		Present Study
Sander	vitreum	Actinopterygii	Perciformes	Percidae	fusiform	FALSE	49.9636	43.982	11.735			4.355			drop		Moreau River. Total length estimated from standard length	Waltner 1988
Sander	vitreum	Actinopterygii	Perciformes	Percidae	fusiform	FALSE	56.7523	49.958	14.514			6.08			drop		Cheyenne River. Total length estimated from standard length	Waltner 1988
Sander	vitreum	Actinopterygii	Perciformes	Percidae	fusiform	FALSE	46.1261	40.604	11.766			4.63			drop		Grand River. Total length estimated from standard length	Waltner 1988
Sander	vitreum	Actinopterygii	Perciformes	Percidae	fusiform	FALSE	47.5734	41.878	12.928			4.769			drop		Blue Dog Lake. Total length estimated from standard length	Waltner 1988
Sander	vitreum	Actinopterygii	Perciformes	Percidae	fusiform	FALSE	50.75	43.1	10.517	7.572		4.372				OSUM 3860		Present Study
Sander	vitreum	Actinopterygii	Perciformes	Percidae	fusiform	FALSE	60	52	13.47	9.589		5.538				OSUM 12985		Present Study
Sander	vitreum	Actinopterygii	Perciformes	Percidae	fusiform	FALSE	59	51	13.116	9.281	6.997	4.635				OSUM 1839		Present Study
Scatophagus	argus	Actinopterygii	Perciformes	Scatophagidae	compressiform	FALSE	14.28	12.11	2.95								"Body length" in this study is the same thing as standard length	Chen et al. 2021
Scatophagus	argus	Actinopterygii	Perciformes	Scatophagidae	compressiform	FALSE	14.76	12.53	3.1								"Body length" in this study is the same thing as standard length	Chen et al. 2021
Siganus	luridus	Actinopterygii	Perciformes	Siganidae	fusiform	FALSE	20.3	17.2	3.7	2.172	0.94					FSB-Sig-lur-01		Rafrafi-Nouira et al. 2012a
Siganus	luridus	Actinopterygii	Perciformes	Siganidae	fusiform	FALSE	17.3	14.4	3.38	2.47	0.84							Dulčić et al. 2011
Siganus	rivulatus	Actinopterygii	Perciformes	Siganidae	fusiform	FALSE	19.3	16.2	3.8	2.45	0.79					FSB-Sig-riv-01		Rafrafi-Nouira et al. 2012a
Siganus	rivulatus	Actinopterygii	Perciformes	Siganidae	fusiform	FALSE	27.1	21.9	4.7	2.59	0.9							Soykan et al. 2021
Sparisoma	cretense	Actinopterygii	Perciformes	Scaridae	fusiform	FALSE	26.257	21.878	6.536	3.47								Kampouris and Batjakas 2018
Spicara	flexuosa	Actinopterygii	Perciformes	Centracanthidae	fusiform	FALSE	15.7104	12.21	3.33								Total length estimated via reported fork length to total length regression equations	Rizkalla 1996
Spicara	maena	Actinopterygii	Perciformes	Centracanthidae	fusiform	FALSE	12.5278	9.88	2.69								Total length estimated via reported fork length to total length regression equations	Rizkalla 1996
Spicara	smaris	Actinopterygii	Perciformes	Centracanthidae	fusiform	FALSE	14.0378	11.31	2.87								Total length estimated via reported fork length to total length regression equations	Rizkalla 1996
Stereolepis	gigas	Actinopterygii	Perciformes	Polyprionidae	fusiform	FALSE	215	179.4	57	36.02	21.044							Allen and Andrews 2012
Variola	albimarginata	Actinopterygii	Perciformes	Serranidae	fusiform	FALSE	31.8	22	6.735	4.49	3.092					BPBM 20152	Head length measured minus opercular flap	Randall 1997
Variola	albimarginata	Actinopterygii	Perciformes	Serranidae	fusiform	FALSE	35.3	25.4	8.211	5.234	3.614						Head length measured minus opercular flap	Randall 1997
Variola	albimarginata	Actinopterygii	Perciformes	Serranidae	fusiform	FALSE	39	26.8	8.536	5.956	4.172						Head length measured minus opercular flap	Randall 1997
Variola	louti	Actinopterygii	Perciformes	Serranidae	fusiform	FALSE	38.1	27.3	9.012	5.449	3.735							Randall 1997, Mihalitsis and Bellwood 2019
Percopsis	omiscomaycus	Actinopterygii	Percopsiformes	Percopsidae	fusiform	FALSE	12.176	10.526	2.781	1.846	0.872	0.929				CMNH 3015		Present Study
Percopsis	omiscomaycus	Actinopterygii	Percopsiformes	Percopsidae	fusiform	FALSE	10.775	9.004	2.311	1.787	0.588	0.676				CMNH 2672a		Present Study
Percopsis	omiscomaycus	Actinopterygii	Percopsiformes	Percopsidae	fusiform	FALSE	3.88	3.292	0.913	0.688	0.23	0.213			juvenile	CMNH 2672b		Present Study
Percopsis	omiscomaycus	Actinopterygii	Percopsiformes	Percopsidae	fusiform	FALSE	11.907	9.693	2.578	1.883	0.75	0.726				CMNH 5380		Present Study
Percopsis	omiscomaycus	Actinopterygii	Percopsiformes	Percopsidae	fusiform	FALSE	11.833	9.651	2.832	1.956	0.85	0.841				CMNH 2752a		Present Study
Percopsis	omiscomaycus	Actinopterygii	Percopsiformes	Percopsidae	fusiform	FALSE	13.247	11.019	2.854	1.866	0.876	0.923				CMNH 2752b		Present Study
Percopsis	omiscomaycus	Actinopterygii	Percopsiformes	Percopsidae	fusiform	FALSE	11.492	9.546	2.802	2.123	0.85	0.836				CMNH 2752c		Present Study
Percopsis	omiscomaycus	Actinopterygii	Percopsiformes	Percopsidae	fusiform	FALSE	13.538	11.444	3.215	2.432	1.003	0.997				CMNH 2752d		Present Study
Citharichthys	spilopterus	Actinopterygii	Pleuronectiformes	Paralichthyidae	flattened	FALSE	45.6	38	9.88	7.03	4.75					USNM 16315		Goode and Bean 1879a
Citharichthys	spilopterus	Actinopterygii	Pleuronectiformes	Paralichthyidae	flattened	FALSE	41.2	34.5	9.315		4.485					USNM 15177		Goode and Bean 1879a
Citharichthys	spilopterus	Actinopterygii	Pleuronectiformes	Paralichthyidae	flattened	FALSE	48.6	40.5	11.34	8.1	5.4675					USNM 21279		Goode and Bean 1879a
Citharichthys	spilopterus	Actinopterygii	Pleuronectiformes	Paralichthyidae	flattened	FALSE	31.5	25.6	7.168		3.328					USNM 8436		Goode and Bean 1879a
Psettodes	erumei	Actinopterygii	Pleuronectifromes	Psettodidae	flattened	FALSE	42.4	34.3	8.782	6.125	6.346							Randall 1997
Polypterus	mokelembembe	Actinopterygii	Polypteriformes	Polypteridae	elongate	FALSE	18.31	16.61	2.80709	1.41	1.21							Schliewen and Schäfer 2006
Polypterus	mokelembembe	Actinopterygii	Polypteriformes	Polypteridae	elongate	FALSE	21.54	19.61	3.44	2.09	1.89					ZSM 33571-3		Schliewen and Schäfer 2006
Polypterus	palmas	Actinopterygii	Polypteriformes	Polypteridae	elongate	FALSE	29.73	26.29	4.27	2.83	1.72					RMCA (MRAC) 92-52-P-10-20		Hanssens et al. 1995
Polypterus	palmas	Actinopterygii	Polypteriformes	Polypteridae	elongate	FALSE	26.103	23.1	4.2042								Total length estimated using the proportions of MRAC 73-10-P-14-15, as total length was apparently measured by Hanssens et al. 1995 but not reported. Includes data from MRAC 73-10-P-14-15	Hanssens et al. 1995
Polypterus	palmas	Actinopterygii	Polypteriformes	Polypteridae	elongate	FALSE	26.2	23.42	4.19	2.69	2.11					RMCA (MRAC) 73-10-P-14-15		Hanssens et al. 1995
Polypterus	palmas	Actinopterygii	Polypteriformes	Polypteridae	elongate	FALSE	25.9	25.9	4.7656								Total length estimated using the proportions of MRAC 92-52-P-10-20, as total length was apparently measured by Hanssens et al. 1995 but not reported. Includes data from MRAC 92-52-P-10-20	Hanssens et al. 1995
Polypterus	polli	Actinopterygii	Polypteriformes	Polypteridae	elongate	FALSE	28.7	26.53	4.93	3.34	2.51					RMCA (MRAC) 47667		Hanssens et al. 1995
Polypterus	polli	Actinopterygii	Polypteriformes	Polypteridae	elongate	FALSE	24.3982	22.57	4.37858								Total length estimated using the proportions of MRAC 47667, as total length was apparently measured by Hanssens et al. 1995 but not reported. Includes data from MRAC 47667	Hanssens et al. 1995
Polypterus	retropinnis	Actinopterygii	Polypteriformes	Polypteridae	elongate	FALSE	27.3641	20.18	3.57186	2.26	1.94						Total length estimated from ZSM 29729 because tail fin is damaged	Schliewen and Schäfer 2006
Polypterus	retropinnis	Actinopterygii	Polypteriformes	Polypteridae	elongate	FALSE	26.18	23.78	4.23	2.84	2.2					ZSM 29729		Schliewen and Schäfer 2006
Heteropriacanthus	cruentatus	Actinopterygii	Priacanthiformes	Priacanthidae	fusiform	FALSE	55	44	13	10.5	6.25	4.582				FSBC 11731		Present Study
Priacanthus	sagittarius	Actinopterygii	Priacanthiformes	Priacanthidae	compressiform	FALSE	19.3	15.4	5.3	4.28	2.64							Alshawy et al. 2019
Priacanthus	sagittarius	Actinopterygii	Priacanthiformes	Priacanthidae	compressiform	FALSE	24.362	19.401	6.225	4.947	3.385							Gökoğlu and Teker 2018
Priacanthus	sagittarius	Actinopterygii	Priacanthiformes	Priacanthidae	compressiform	FALSE	33	26	7.99	6.3	4.49					BPBM 19473		Randall 1997
Priacanthus	zaiserae	Actinopterygii	Priacanthiformes	Priacanthidae	compressiform	FALSE	20.569	17.02	5.789	4.639	2.961				juvenile?	KAUM-I 57885		Jeong and Motomura 2014
Priacanthus	zaiserae	Actinopterygii	Priacanthiformes	Priacanthidae	compressiform	FALSE	18.709	15.58	4.898	3.959	2.74				juvenile?	KAUM-I 57884		Jeong and Motomura 2014
Hucho	hucho	Actinopterygii	Salmoniformes	Salmonidae	fusiform	FALSE	84.567	71.654	18.701	14.248	8.853					SNM 5638		Holcik and Stefanov 2008
Hucho	hucho	Actinopterygii	Salmoniformes	Salmonidae	fusiform	FALSE	60.7082	52.848	13.9207		5.47225						From Turiec area	Holcik et al. 1988
Hucho	taimen	Actinopterygii	Salmoniformes	Salmonidae	fusiform	FALSE	64.3631	55.42	13.6033		5.08763						From Shishkid River Basin	Holcik et al. 1988
Oncorhynchus	clarkii	Actinopterygii	Salmoniformes	Salmonidae	fusiform	FALSE	23.4	20.6	5.047		2.2866	2.987					females, O. c. clarki. Body width is head width. Fork length treated as total length as O. clarkii does not have a prominent caudal notch	Gold et al. 1978
Oncorhynchus	clarkii	Actinopterygii	Salmoniformes	Salmonidae	fusiform	FALSE	22	19.5	5.0505		2.3985	3.12					males, O. c. clarki. Body width is head width. Fork length treated as total length as O. clarkii does not have a prominent caudal notch	Gold et al. 1978
Oncorhynchus	gorbuscha	Actinopterygii	Salmoniformes	Salmonidae	fusiform	FALSE	83.9	71	19.88									Rosenfeld 1998
Oncorhynchus	kisutch	Actinopterygii	Salmoniformes	Salmonidae	fusiform	FALSE	59	50	14.207	11.98	10.103	4.142				OSUM 16772		Present Study
Oncorhynchus	kisutch	Actinopterygii	Salmoniformes	Salmonidae	fusiform	FALSE	46.4	38.3	8.525	6.313	5.41	2.668				OSUM 109450		Present Study
Oncorhynchus	kisutch	Actinopterygii	Salmoniformes	Salmonidae	fusiform	FALSE	44.9	38.3	8.896	6.911	4.43	2.57				OSUM 104830a		Present Study
Oncorhynchus	kisutch	Actinopterygii	Salmoniformes	Salmonidae	fusiform	FALSE	38.4	33.2	7.909	5.379	3.64	2.508				OSUM 104830b		Present Study
Oncorhynchus	kisutch	Actinopterygii	Salmoniformes	Salmonidae	fusiform	FALSE	54.3	47	12.358	9.567	8.56	4.34				OSUM 19087		Present Study
Oncorhynchus	mykiss	Actinopterygii	Salmoniformes	Salmonidae	fusiform	FALSE	63.7	54.9	14.9		9.11	5.34				USNM 181845, male	Farm-raised specimens. Unclear if "gape width" is equal to "mouth width"	Schwartz 2007
Oncorhynchus	mykiss	Actinopterygii	Salmoniformes	Salmonidae	fusiform	FALSE	58.9	51.1	9.52		6.27	4.59				USNM 181845, female	Farm-raised specimens. Unclear if "gape width" is equal to "mouth width"	Schwartz 2007
Oncorhynchus	mykiss	Actinopterygii	Salmoniformes	Salmonidae	fusiform	FALSE	44.5	39	9.204	6.115	4.18	2.865				OSUM 1806		Present Study
Oncorhynchus	mykiss	Actinopterygii	Salmoniformes	Salmonidae	fusiform	FALSE	48.5	43.2	7.935	5.548		2.24				OSUM 9132		Present Study
Oncorhynchus	mykiss	Actinopterygii	Salmoniformes	Salmonidae	fusiform	FALSE	52.4	45.9	8.956	5.813	8.22	3.073				OSUM 10664		Present Study
Oncorhynchus	tshawytscha	Actinopterygii	Salmoniformes	Salmonidae	fusiform	FALSE	42.2	35	10.045									Rosenfeld 1998
Oncorhynchus	tshawytscha	Actinopterygii	Salmoniformes	Salmonidae	fusiform	FALSE	62.349	56.4	11.08	8.496	6.418					NMNZ P.044391	Caught in a marine environment	Te Papa Museum 2022a
Salmo	labrax	Actinopterygii	Salmoniformes	Salmonidae	fusiform	FALSE	23.1437	19.9	4.536									Holcik and Stefanov 2008
Salmo	labrax	Actinopterygii	Salmoniformes	Salmonidae	fusiform	FALSE	25.2072	21.6	4.7							NMNHS 279/5		Holcik and Stefanov 2008
Salmo	labrax	Actinopterygii	Salmoniformes	Salmonidae	fusiform	FALSE	20.1361	17.05	4.209	2.59						NMNHS 279/4		Holcik and Stefanov 2008
Salmo	labrax	Actinopterygii	Salmoniformes	Salmonidae	fusiform	FALSE	22.464	19.5	4.7276							NMNHS 279/2		Holcik and Stefanov 2008
Salmo	salar	Actinopterygii	Salmoniformes	Salmonidae	fusiform	FALSE	72.4	62.1	15.685	12.472	8.429	4.079				OSUM 65220a		Present Study
Salmo	salar	Actinopterygii	Salmoniformes	Salmonidae	fusiform	FALSE	77.5	66.3	16.203	12.763	7.667	4.759				OSUM 65520b		Present Study
Salmo	trutta	Actinopterygii	Salmoniformes	Salmonidae	fusiform	FALSE	50.8	45.9	12.78		7.42	4.84				USNM 181884, male	Farm-raised specimens. Unclear if "gape width" is equal to "mouth width"	Schwartz 2007
Salmo	trutta	Actinopterygii	Salmoniformes	Salmonidae	fusiform	FALSE	49.6	42.6	10.07		8.44	3.19				USNM 181884, female	Farm-raised specimens. Unclear if "gape width" is equal to "mouth width"	Schwartz 2007
Salmo	trutta	Actinopterygii	Salmoniformes	Salmonidae	fusiform	FALSE	36.3	30.75	8.182	5.873	3.96	3.046				OSUM 9126		Present Study
Salmo	trutta	Actinopterygii	Salmoniformes	Salmonidae	fusiform	FALSE	36.1	31	8.927	6.966	5.46	2.771				OSUM 1805		Present Study
Salmo	trutta	Actinopterygii	Salmoniformes	Salmonidae	fusiform	FALSE	44.5	37.5	12.432	9.057	7.28	3.934				OSUM 13655		Present Study
Salmo	trutta	Actinopterygii	Salmoniformes	Salmonidae	fusiform	FALSE	44.5	38.5	12.437	8.934	7.98	4.133				OSUM 9126a		Present Study
Salmo	trutta	Actinopterygii	Salmoniformes	Salmonidae	fusiform	FALSE	44.4	38.2	11.641	8.241	6.3	4.012				OSUM 9126b		Present Study
Salvelinus	alpinus	Actinopterygii	Salmoniformes	Salmonidae	fusiform	FALSE	23.1	19.5	4.29975	2.7	1.73							Pavlov et al. 2012
Salvelinus	alpinus	Actinopterygii	Salmoniformes	Salmonidae	fusiform	FALSE	28.4308	24	4.9872		1.9776						total length estimated from total length/standard length ratio in one figured specimen	Pavlov et al. 2012
Salvelinus	alpinus	Actinopterygii	Salmoniformes	Salmonidae	fusiform	FALSE	24.4031	20.6	4.48256		2.09914						total length estimated from total length/standard length ratio in one figured specimen	Pavlov et al. 2012
Salvelinus	alpinus	Actinopterygii	Salmoniformes	Salmonidae	fusiform	FALSE	26.7723	22.6	4.65786		1.83286						total length estimated from total length/standard length ratio in one figured specimen	Pavlov et al. 2012
Salvelinus	fontinalis	Actinopterygii	Salmoniformes	Salmonidae	fusiform	FALSE	36.2	32.8	8.43		5.56	3.82				USNM 181843, male	Farm-raised specimens. Unclear if "gape width" is equal to "mouth width"	Schwartz 2007
Salvelinus	fontinalis	Actinopterygii	Salmoniformes	Salmonidae	fusiform	FALSE	36.8	31.6	7.41		4.47	3.82				USNM 181843, female	Farm-raised specimens. Unclear if "gape width" is equal to "mouth width"	Schwartz 2007
Salvelinus	fontinalis	Actinopterygii	Salmoniformes	Salmonidae	fusiform	FALSE	23.4	20.25	5.37	3.691	3.517	2.396				CMNH 8657		Present Study
Salvelinus	fontinalis	Actinopterygii	Salmoniformes	Salmonidae	fusiform	FALSE	21	18.9	4.68	3.082	1.825	1.837				OSUM 4245a		Present Study
Salvelinus	fontinalis	Actinopterygii	Salmoniformes	Salmonidae	fusiform	FALSE	27.4	24	5.989	3.89	2.999	2.551				OSUM 4245b		Present Study
Salvelinus	fontinalis	Actinopterygii	Salmoniformes	Salmonidae	fusiform	FALSE	20.4	17.8	4.414	3.005	1.915	1.67				OSUM 4245c		Present Study
Salvelinus	namaycush	Actinopterygii	Salmoniformes	Salmonidae	fusiform	FALSE	42.6	35.9	9.65		5.05	2.68				USNM 181842, male	Farm-raised specimens. Unclear if "gape width" is equal to "mouth width"	Schwartz 2007
Salvelinus	namaycush	Actinopterygii	Salmoniformes	Salmonidae	fusiform	FALSE	39.5	33.4	9.23		5.39	2.92				USNM 181842, female	Farm-raised specimens. Unclear if "gape width" is equal to "mouth width"	Schwartz 2007
Thymallus	arcticus	Actinopterygii	Salmoniformes	Salmonidae	fusiform	FALSE	42	35	7.149	4.263	2.17	1.975				OSUM 14845		Present Study
Acanthocybium	solandri	Actinopterygii	Scombriformes	Scombridae	elongate	FALSE	124.462	112.2	26		13.2						Fork length converted to total length using equation of Hogwarth 1976	Rao 1960
Acanthocybium	solandri	Actinopterygii	Scombriformes	Scombridae	elongate	FALSE	117.35	104.5	24.2		12.1						Fork length converted to total length using equation of Hogwarth 1976	Rao 1960
Acanthocybium	solandri	Actinopterygii	Scombriformes	Scombridae	elongate	FALSE	109.73	98.4	24.5		12						Fork length converted to total length using equation of Hogwarth 1976	Rao 1960
Acanthocybium	solandri	Actinopterygii	Scombriformes	Scombridae	elongate	FALSE	109.628	98.5	23.1		11.5						Fork length converted to total length using equation of Hogwarth 1976	Rao 1960
Acanthocybium	solandri	Actinopterygii	Scombriformes	Scombridae	elongate	FALSE	124.97	112.8	26.5		13.5						Fork length converted to total length using equation of Hogwarth 1976	Rao 1960
Acanthocybium	solandri	Actinopterygii	Scombriformes	Scombridae	elongate	FALSE	118.264	106.4	25.9		13.1						Fork length converted to total length using equation of Hogwarth 1976	Rao 1960
Acanthocybium	solandri	Actinopterygii	Scombriformes	Scombridae	elongate	FALSE	113.286	102	24.7		12.4						Fork length converted to total length using equation of Hogwarth 1976	Rao 1960
Acanthocybium	solandri	Actinopterygii	Scombriformes	Scombridae	elongate	FALSE	142.5	131.61	30	24.532	16	14						Romeo et al. 2005
Acanthocybium	solandri	Actinopterygii	Scombriformes	Scombridae	elongate	FALSE	195.3	146.8	36	26.5	17.8						It is assumed that "A.P. length of tail from min. width of pedicle" refers to peduncle length, and "AP depth of tail notch" refers to length of caudal fin beyond this	Conrad and LaMonte 1937
Acanthocybium	solandri	Actinopterygii	Scombriformes	Scombridae	elongate	FALSE	109.222	90.5	23.8	17.15	14.41	4.544				FSBC 6267	Tail fin damaged, total length estimated from fork length using equation of Hogwarth 1976	Present Study
Allothunnus	fallai	Actinopterygii	Scombriformes	Scombridae	fusiform	FALSE	85.208	73.191	20.4	13.11	7.8							Collette and Díaz de Astarloa 2008
Allothunnus	fallai	Actinopterygii	Scombriformes	Scombridae	fusiform	FALSE	85		20.5	15.5	7.2							Olsen 1962
Allothunnus	fallai	Actinopterygii	Scombriformes	Scombridae	fusiform	FALSE	96.5		23	17.4								Olsen 1962
Allothunnus	fallai	Actinopterygii	Scombriformes	Scombridae	fusiform	FALSE	92.4882	79.8	20.1894		7.7406						What these authors describe as "standard length" is actually fork length	Wolfe and Webb 1975
Allothunnus	fallai	Actinopterygii	Scombriformes	Scombridae	fusiform	FALSE	97.92	85	22.44		7.48						What these authors describe as "standard length" is actually fork length	Wolfe and Webb 1975
Allothunnus	fallai	Actinopterygii	Scombriformes	Scombridae	fusiform	FALSE	79.94	70	16.45		6.58						What these authors describe as "standard length" is actually fork length	Wolfe and Webb 1975
Allothunnus	fallai	Actinopterygii	Scombriformes	Scombridae	fusiform	FALSE	85.5	75	18.975		7.35						What these authors describe as "standard length" is actually fork length	Wolfe and Webb 1975
Allothunnus	fallai	Actinopterygii	Scombriformes	Scombridae	fusiform	FALSE	89.9367	79.1	19.9332		7.9891						What these authors describe as "standard length" is actually fork length	Wolfe and Webb 1975
Allothunnus	fallai	Actinopterygii	Scombriformes	Scombridae	fusiform	FALSE	94.205	83	20.501		7.47						What these authors describe as "standard length" is actually fork length	Wolfe and Webb 1975
Allothunnus	fallai	Actinopterygii	Scombriformes	Scombridae	fusiform	FALSE	94.4434	82.7	21.4193		7.6911						What these authors describe as "standard length" is actually fork length	Wolfe and Webb 1975
Allothunnus	fallai	Actinopterygii	Scombriformes	Scombridae	fusiform	FALSE	80.9442	69.9	17.475		5.9415						What these authors describe as "standard length" is actually fork length	Wolfe and Webb 1975
Allothunnus	fallai	Actinopterygii	Scombriformes	Scombridae	fusiform	FALSE	90.4202	83.8	20.6986		7.4582						What these authors describe as "standard length" is actually fork length	Wolfe and Webb 1975
Allothunnus	fallai	Actinopterygii	Scombriformes	Scombridae	fusiform	FALSE	86.9836	74.6	18.4262		7.2362						What these authors describe as "standard length" is actually fork length	Wolfe and Webb 1975
Aphanopus	carbo	Actinopterygii	Scombriformes	Trichiuridae	anguilliform	FALSE	103	95.7	18.4038									Templeman and Squires 1963
Aphanopus	carbo	Actinopterygii	Scombriformes	Trichiuridae	anguilliform	FALSE	109	100.2	18.9057						adult			Templeman and Squires 1963
Aphanopus	carbo	Actinopterygii	Scombriformes	Trichiuridae	anguilliform	FALSE	110	101.9	19.2264						subadult			Templeman and Squires 1963
Aphanopus	intermedius	Actinopterygii	Scombriformes	Trichiuridae	anguilliform	FALSE	72.5		13.63	10.9176	6.71959							Eduardo et al. 2018
Arripis	trutta	Actinopterygii	Scombriformes	Arripidae	fusiform	FALSE	85	76	20.021	12.775	7.583				adult	NMNZ P.34534		Duffy and Petherick 1999
Arripis	trutta	Actinopterygii	Scombriformes	Arripidae	fusiform	FALSE	54.932	45.222	11.159	7.046	4.88				adult			Duffy and Petherick 1999
Arripis	trutta	Actinopterygii	Scombriformes	Arripidae	fusiform	FALSE	55.36	45.524	11.57	6.89	3.965						Picture from iNaturalist at https://www.inaturalist.org/observations/98423056	Duffy pers. comm. (iNaturalist)
Auxis	rochei	Actinopterygii	Scombriformes	Scombridae	fusiform	FALSE	34.15	29.4	7.72473									Ragheb and Rizkalla et al. 2020
Auxis	rochei	Actinopterygii	Scombriformes	Scombridae	fusiform	FALSE	40.69	34.699	9.148							Ghar el Melh sample		Allaya et al. 2016
Auxis	rochei	Actinopterygii	Scombriformes	Scombridae	fusiform	FALSE	37.391	35.1561	9.19428							Mahdia sample		Allaya et al. 2016
Auxis	rochei	Actinopterygii	Scombriformes	Scombridae	fusiform	FALSE	37.7699	33.8837	9.12326							Sidi Daoud sample		Allaya et al. 2016
Auxis	rochei	Actinopterygii	Scombriformes	Scombridae	fusiform	FALSE	32.7	29.26	7.36	3.81	2.52					Auroc_u1		Randall 1997
Auxis	rochei	Actinopterygii	Scombriformes	Scombridae	fusiform	FALSE	28.9	26.31	6.79	3.35	2.51					Auroc_u2		Randall 1997
Auxis	thazard	Actinopterygii	Scombriformes	Scombridae	fusiform	FALSE	31.3	28.06	7.73	4.65	2.67					Autha u2		Randall 1997
Auxis	thazard	Actinopterygii	Scombriformes	Scombridae	fusiform	FALSE	27.8	24.97	6.96	3.76	2.37					Autha u4		Randall 1997
Auxis	thazard	Actinopterygii	Scombriformes	Scombridae	fusiform	FALSE	33.3	29.22	7.65	4.18	2.55					Autha u3		Randall 1997
Auxis	thazard	Actinopterygii	Scombriformes	Scombridae	fusiform	FALSE	43.5	39.02	10.43	4.88	3.27					Autha u1		Randall 1997
Brama	brama	Actinopterygii	Scombriformes	Bramidae	fusiform	FALSE	32.2	24.5	7		3.5				juvenile	Individual 1		Mytilineou et al. 2013
Brama	brama	Actinopterygii	Scombriformes	Bramidae	fusiform	FALSE	31.5	23.2	6.7		3				juvenile	Individual 2		Mytilineou et al. 2013
Brama	brama	Actinopterygii	Scombriformes	Bramidae	fusiform	FALSE	64.3	50.2	13.9		7.5					Individual 3		Mytilineou et al. 2013
Brama	brama	Actinopterygii	Scombriformes	Bramidae	fusiform	FALSE	61.9	48.2	13.1		7.1					Individual 4		Mytilineou et al. 2013
Brama	brama	Actinopterygii	Scombriformes	Bramidae	fusiform	FALSE	60.2	47	13		7					Individual 5		Mytilineou et al. 2013
Brama	brama	Actinopterygii	Scombriformes	Bramidae	fusiform	FALSE	63	49	13.5		7.3					Individual 6		Mytilineou et al. 2013
Brama	brama	Actinopterygii	Scombriformes	Bramidae	fusiform	FALSE	62	48.1	13.1		7.2					Individual 7		Mytilineou et al. 2013
Brama	brama	Actinopterygii	Scombriformes	Bramidae	fusiform	FALSE	54.5	42.2	11.8		6.3					Individual 8		Mytilineou et al. 2013
Brama	brama	Actinopterygii	Scombriformes	Bramidae	fusiform	FALSE	56.5	43.8	12.4		6.7					Individual 9		Mytilineou et al. 2013
Brama	brama	Actinopterygii	Scombriformes	Bramidae	fusiform	FALSE	56.5	44	12		6.5					Individual 10		Mytilineou et al. 2013
Brama	brama	Actinopterygii	Scombriformes	Bramidae	fusiform	FALSE	58.5	45.2	12.8		6.8					Individual 11		Mytilineou et al. 2013
Brama	brama	Actinopterygii	Scombriformes	Bramidae	fusiform	FALSE	63	46.1	12.8		7					Individual 12		Mytilineou et al. 2013
Centrolophus	niger	Actinopterygii	Scombriformes	Centrolophidae	fusiform	FALSE	92	78	20.5							MNHNC P7250		Reyes et al. 2007
Centrolophus	niger	Actinopterygii	Scombriformes	Centrolophidae	fusiform	FALSE	51.9	43.4	10.3	5.599	2.801					MEUFC-18- 11-057		Ayas et al. 2018
Centrolophus	niger	Actinopterygii	Scombriformes	Centrolophidae	fusiform	FALSE	40.4	33.6	7.896		2.8896					Specimen 11		Mackay 1972
Centrolophus	niger	Actinopterygii	Scombriformes	Centrolophidae	fusiform	FALSE	44.6	35.4	8.496		3.1152					Specimen 1		Mackay 1972
Centrolophus	niger	Actinopterygii	Scombriformes	Centrolophidae	fusiform	FALSE	44.1	37.1	8.6072		3.1906					Specimen 12		Mackay 1972
Centrolophus	niger	Actinopterygii	Scombriformes	Centrolophidae	fusiform	FALSE	47.1	37.8	9.4122		3.2886					Specimen 3		Mackay 1972
Centrolophus	niger	Actinopterygii	Scombriformes	Centrolophidae	fusiform	FALSE	45.4	39.2	8.5848		2.9008					Specimen 8		Mackay 1972
Centrolophus	niger	Actinopterygii	Scombriformes	Centrolophidae	fusiform	FALSE	49.2	39.9	9.6159		3.192					Specimen 2		Mackay 1972
Centrolophus	niger	Actinopterygii	Scombriformes	Centrolophidae	fusiform	FALSE	49.5	41	9.307		3.403					Specimen 14		Mackay 1972
Centrolophus	niger	Actinopterygii	Scombriformes	Centrolophidae	fusiform	FALSE	51.3	42.6	9.1164		3.2802					Specimen 7		Mackay 1972
Centrolophus	niger	Actinopterygii	Scombriformes	Centrolophidae	fusiform	FALSE	51.4	43.3	9.6126		3.3774					Specimen 13		Mackay 1972
Centrolophus	niger	Actinopterygii	Scombriformes	Centrolophidae	fusiform	FALSE	54.2	46.4	10.0688		3.48					Specimen 10		Mackay 1972
Centrolophus	niger	Actinopterygii	Scombriformes	Centrolophidae	fusiform	FALSE	55.6	47.7	10.2078		3.4821					Specimen 9		Mackay 1972
Cybiosarda	elegans	Actinopterygii	Scombriformes	Scombridae	fusiform	FALSE	38.17	32.3713	9.2302		4.511						Reported as proportions, data missing for some individuals. Total length and standard length estimated from fork length using proportions in specimen figured in this study (fig. 1a, USNM 25907-F2)	Collete and Chao 1975
Epinnula	magistralis	Actinopterygii	Scombriformes	Gempylidae	fusiform	FALSE	101.68	82	25.666	16.398	13.12					USNM 391434		Ho et al. 2017
Epinnula	pacifica	Actinopterygii	Scombriformes	Gempylidae	fusiform	FALSE	84.922	71	22.01	15.47	10.863					KAUM-I 172269		Hata and Motomura 2016; Ho et al. 2017
Epinnula	pacifica	Actinopterygii	Scombriformes	Gempylidae	fusiform	FALSE	85.84	75	24.3	16.25	11.85					KAUM-I 151544		Hata and Motomura 2016; Ho et al. 2017
Eumegistus	breviorti	Actinopterygii	Scombriformes	Bramidae	compressiform	FALSE	64.28	52.3	13.76	10.02							measured off of figure 2 of this paper because individual or mean measurements not reported	Carvalho-Filho et al. 2009
Eumegistus	illustris	Actinopterygii	Scombriformes	Bramidae	fusiform	FALSE	51	37	11.223	8.282	5.57							Bos and Gumanao 2013
Eumegistus	illustris	Actinopterygii	Scombriformes	Bramidae	fusiform	FALSE	63	50	12.1	7.6	6.27							Randall 1997
Euthynnus	affinis	Actinopterygii	Scombriformes	Scombridae	fusiform	FALSE	52.7	46.51	12.68	9.99	4.79						Standard length measured to base of caudal fin	Randall 1997
Euthynnus	affinis	Actinopterygii	Scombriformes	Scombridae	fusiform	FALSE	40.7	36.55	9.91	5.18	3.72						Standard length measured to base of caudal fin	Randall 1997
Euthynnus	alletteratus	Actinopterygii	Scombriformes	Scombridae	fusiform	FALSE	46.5242	40.4835	9.90953							Madhia sample	Mean values for samples used because length-length regressions gave unusual results. "Snout length" in this study is actually mouth length per this study's terms	Allaya et al. 2017
Euthynnus	alletteratus	Actinopterygii	Scombriformes	Scombridae	fusiform	FALSE	55.1354	40.7312	12.0639							Zarzis sample	Mean values for samples used because length-length regressions gave unusual results. "Snout length" in this study is actually mouth length per this study's terms	Allaya et al. 2017
Euthynnus	alletteratus	Actinopterygii	Scombriformes	Scombridae	fusiform	FALSE	68.7812	60.9327	16.4928		6.17837							Adams and Kerstetter 2014
Euthynnus	alletteratus	Actinopterygii	Scombriformes	Scombridae	fusiform	FALSE	79.747	69.645	19.7	13.264	7.2							Romeo and Mansueti 1962
Gasterochisma	melampus	Actinopterygii	Scombriformes	Scombridae	fusiform	FALSE	144	120.259	29.82	22.957	12.64	12.672				MNRJ 37577	Mouth width is a bit approximate due to angle	Santos and Nunan 2015
Gasterochisma	melampus	Actinopterygii	Scombriformes	Scombridae	fusiform	FALSE	141.3	115.2	32.8	24.84	15.73	10.6			adult	AZUSC4135		Rotundo et al. 2015
Gasterochisma	melampus	Actinopterygii	Scombriformes	Scombridae	fusiform	FALSE	194.516	160.07	46.332	37.911	23.166				adult	USNM 325137		Ito et al. 1994
Gasterochisma	melampus	Actinopterygii	Scombriformes	Scombridae	fusiform	FALSE	128.458	105.71	29.3227		14.6027				adult		Total length and standard length estimated using proportions relative to fork length in one figured specimen	Ito et al. 1994
Gasterochisma	melampus	Actinopterygii	Scombriformes	Scombridae	fusiform	FALSE	41.6898	34.2	8.55						juvenile			Scott 1981
Gasterochisma	melampus	Actinopterygii	Scombriformes	Scombridae	fusiform	FALSE	44.7888	37.2	9.0024						juvenile			Scott 1981
Gasterochisma	melampus	Actinopterygii	Scombriformes	Scombridae	fusiform	FALSE	57.822	46	11.5						juvenile			Scott 1981
Gempylus	serpens	Actinopterygii	Scombriformes	Gempylidae	anguilliform	FALSE	83	73.5	14	9.96	7							Osmany et al. 2019
Gempylus	serpens	Actinopterygii	Scombriformes	Gempylidae	anguilliform	FALSE	55.4	50.6	8.87719	6.37	3.94					NIBR 0000020418		Myoung et al. 2013
Gempylus	serpens	Actinopterygii	Scombriformes	Gempylidae	anguilliform	FALSE	55.5095	50.7	9.38889								Total length and fork length calculated from standard length in figured specimen	Myoung et al. 2013
Grammatorcynus	bilineatus	Actinopterygii	Scombriformes	Scombridae	fusiform	FALSE	20.9496	19.2	4.98		2.1924					PSUZC 20110813-01.01	Total length estimated based on fork length/total length in PSUZC 20110813-01.02	Lheknim 2019
Grammatorcynus	bilineatus	Actinopterygii	Scombriformes	Scombridae	fusiform	FALSE	22.089	20.2	5.08	3.526	2.3112					PSUZC 20110813-01.02		Lheknim 2019
Gymnosarda	unicolor	Actinopterygii	Scombriformes	Scombridae	fusiform	FALSE	71.98	59	15.694									Sivadas and Balasubramanian, 1982
Gymnosarda	unicolor	Actinopterygii	Scombriformes	Scombridae	fusiform	FALSE	68.3145	54.0513	15.9399		8.358						Total length and standard length estimated from fork length using proportions in specimen figured in this study (fig. 2a, ANSP 93818)	Collete and Chao 1975
Gymnosarda	unicolor	Actinopterygii	Scombriformes	Scombridae	fusiform	FALSE	100.126	79.2209	25.9875		12.1625						Total length and standard length estimated from fork length using proportions in specimen figured in this study (fig. 2a, ANSP 93818)	Collete and Chao 1975
Gymnosarda	unicolor	Actinopterygii	Scombriformes	Scombridae	fusiform	FALSE	106.42	84.2004	25.203		12.648						Total length and standard length estimated from fork length using proportions in specimen figured in this study (fig. 2a, ANSP 93818)	Collete and Chao 1975
Hyperoglyphe	bythites	Actinopterygii	Scombriformes	Centrolophidae	fusiform	FALSE	87.4872	69.6	19.9	10.45	4.33	5.777				FSBC 9732	Tail fin damaged. Total length/standard length ratio calculated from FSBC 18064	Present Study
Hyperoglyphe	bythites	Actinopterygii	Scombriformes	Centrolophidae	fusiform	FALSE	78.6	62.5	17.5	10.09	4.89	5.199				FSBC 18064		Present Study
Hyperoglyphe	perciforma	Actinopterygii	Scombriformes	Centrolophidae	fusiform	FALSE	34.5	27.1	8.13									Merriner et al. 1970
Hyperoglyphe	perciforma	Actinopterygii	Scombriformes	Centrolophidae	fusiform	FALSE	56.1	44.1	13.23									Merriner et al. 1970
Hyperoglyphe	perciforma	Actinopterygii	Scombriformes	Centrolophidae	fusiform	FALSE	78.3	62.7	17.4306									Merriner et al. 1970
Hyperoglyphe	perciforma	Actinopterygii	Scombriformes	Centrolophidae	fusiform	FALSE	81.9	65.8	19.0162									Merriner et al. 1970
Icosteus	aenigmaticus	Actinopterygii	Scombriformes	Icosteidae	fusiform	FALSE	95	82.2	12.7	9.29					adult			Kubota and Uyeno 1971
Katsuwonus	pelamis	Actinopterygii	Scombriformes	Scombridae	fusiform	FALSE	83.9278	79.1547	22.5081		9.4518						total length and standard length estimated from fork length using equation in Adams and Kerstetter 2014	Bullis and Mather 1956
Katsuwonus	pelamis	Actinopterygii	Scombriformes	Scombridae	fusiform	FALSE	63.2062	58.8394	18.496		6.34742							Adams and Kerstetter 2014
Katsuwonus	pelamis	Actinopterygii	Scombriformes	Scombridae	fusiform	FALSE	59.5979	53.6	17.3	12.31	5.75	3.738				FSBC 5033	Tail fin damaged, total length estimated using equation in Adams and Kerstetter 2014	Present Study
Katsuwonus	pelamis	Actinopterygii	Scombriformes	Scombridae	fusiform	FALSE	51.7	46.07	13.59	8.47	5.38						Standard length measured to base of caudal fin	Randall 1997
Lepidocybium	flavobrunneum	Actinopterygii	Scombriformes	Gempylidae	fusiform	FALSE	78.36	67.55	18.15	13.24	7.33						Reported total length 75 cm	Zohra et al. 2020
Lepidocybium	flavobrunneum	Actinopterygii	Scombriformes	Gempylidae	fusiform	FALSE	48.5	40.8	12.6		4.4							Nashad et al. 2018
Lepidocybium	flavobrunneum	Actinopterygii	Scombriformes	Gempylidae	fusiform	FALSE	76.109	62.4	16.7856	14.245								Bartlett and Backus 1962
Lepidocybium	flavobrunneum	Actinopterygii	Scombriformes	Gempylidae	fusiform	FALSE	134.156	113	30.51								Total length back-calculated from fork length using equation in Keller et al. 2014	Bartlett and Backus 1962
Lepidocybium	flavobrunneum	Actinopterygii	Scombriformes	Gempylidae	fusiform	FALSE	105	96	24.3		9.5							Ali et al. 2021
Lepidocybium	flavobrunneum	Actinopterygii	Scombriformes	Gempylidae	fusiform	FALSE	61	53.3	13.7		5.8							Ali et al. 2021
Lepidocybium	flavobrunneum	Actinopterygii	Scombriformes	Gempylidae	fusiform	FALSE	75	65.8	17.3		6.4							Ali et al. 2021
Lepidocybium	flavobrunneum	Actinopterygii	Scombriformes	Gempylidae	fusiform	FALSE	117	103	25.6		8.2							Ali et al. 2021
Lepidocybium	flavobrunneum	Actinopterygii	Scombriformes	Gempylidae	fusiform	FALSE	101	89	24.1		10.3							Ali et al. 2021
Lepidocybium	flavobrunneum	Actinopterygii	Scombriformes	Gempylidae	fusiform	FALSE	83	73.8	18.5		8.8							Ali et al. 2021
Lepidocybium	flavobrunneum	Actinopterygii	Scombriformes	Gempylidae	fusiform	FALSE	85	75.4	18.7		6.8							Ali et al. 2021
Lepidocybium	flavobrunneum	Actinopterygii	Scombriformes	Gempylidae	fusiform	FALSE	106.5	91	26.5185	13.29	11.502							Song et al. 2020
Orcynopsis	unicolor	Actinopterygii	Scombriformes	Scombridae	fusiform	FALSE	50.7	41.6	8.34	6.181	3.105				subadult	MSNC 4616		Insacco and Zava 2020
Promethichthys	prometheus	Actinopterygii	Scombriformes	Gempylidae	fusiform	FALSE	52	45	11.57	8.84								Randall 1997
Psenes	pellucidus	Actinopterygii	Scombriformes	Nomeidae	compressiform	FALSE	44	37	10.14							SU 40963		Horn and Haedrich 1973
Psenes	sio	Actinopterygii	Scombriformes	Nomeidae	compressiform	FALSE	27.0162	21.9	6.86							LACM 31800-1	Tail damaged, estimated from preserved extent	Horn and Haedrich 1973
Rastrelliger	brachyosoma	Actinopterygii	Scombriformes	Scombridae	fusiform	FALSE	19.7	17.1	5									Goutham and Mohanraju 2015
Rastrelliger	faughni	Actinopterygii	Scombriformes	Scombridae	fusiform	FALSE	21.0052	18	4.77		1.872						Total length estimated from standard length/total length in figured individual	Gnanamuttu 1971
Rastrelliger	faughni	Actinopterygii	Scombriformes	Scombridae	fusiform	FALSE	17.8194	15.27	4.41303		1.78659						Total length estimated from standard length/total length in figured individual	Gnanamuttu 1971
Rastrelliger	kanagurta	Actinopterygii	Scombriformes	Scombridae	fusiform	FALSE	36.6	31.1	8.4		3.675							Gowda and Annigeri 1990
Rastrelliger	kanagurta	Actinopterygii	Scombriformes	Scombridae	fusiform	FALSE	24.7	20.749	5.738	4.697	2.999							Randall 1997
Rastrelliger	kanagurta	Actinopterygii	Scombriformes	Scombridae	fusiform	FALSE	25.8	21.734	6.048	4.499	3.337							Randall 1997
Rastrelliger	kanagurta	Actinopterygii	Scombriformes	Scombridae	fusiform	FALSE	19.8	17.3	4.8									Goutham and Mohanraju 2015
Ruvettus	pretiosus	Actinopterygii	Scombriformes	Gempylidae	fusiform	FALSE	139	120	30.95	20.4	11.91							Acarli et al. 2017
Ruvettus	pretiosus	Actinopterygii	Scombriformes	Gempylidae	fusiform	FALSE	88.1	70.5	20.8									Gómez-Cubillo and Grijalba-Bendeck 2016
Ruvettus	pretiosus	Actinopterygii	Scombriformes	Gempylidae	fusiform	FALSE	133	110	30.5	20.58	17.2							Ben Amor et al. 2021
Ruvettus	pretiosus	Actinopterygii	Scombriformes	Gempylidae	fusiform	FALSE	163	138	38									Bettoso and Dulcic 1999
Ruvettus	pretiosus	Actinopterygii	Scombriformes	Gempylidae	fusiform	FALSE	122	103	28.4		14.9							Ben Amour et al. 2010
Ruvettus	pretiosus	Actinopterygii	Scombriformes	Gempylidae	fusiform	FALSE	96.8	82	22.05	16.49	11.98							Randall 1997
Sarda	australis	Actinopterygii	Scombriformes	Scombridae	fusiform	FALSE	41.5	35.427	9.552	7.203	4.997						Standard length measured to base of caudal fin	Randall 1997
Sarda	australis	Actinopterygii	Scombriformes	Scombridae	fusiform	FALSE	37.8159	32.282	9.3183		4.8511						Reported as proportions, data missing for some individuals. Total and standard length estimated from fork length using the proportions of the specimen of Sarda orientalis in Randall (1997)	Collete and Chao 1975
Sarda	chiliensis	Actinopterygii	Scombriformes	Scombridae	fusiform	FALSE	40.4661	35.0282	9.8625		4.725					Sarda chilensis lineolata	Reported as proportions, data missing for some individuals. Total length and standard length estimated from fork length using a photo by P. Béarez uploaded to FishBase (https://www.fishbase.se/photos/PicturesSummary.php?ID=113&what=species)	Collete and Chao 1975
Sarda	chiliensis	Actinopterygii	Scombriformes	Scombridae	fusiform	FALSE	53.739	46.5175	13.5456		6.474					Sarda chilensis chilensis	Reported as proportions, data missing for some individuals. Total length and standard length estimated from fork length using a photo by P. Béarez uploaded to FishBase (https://www.fishbase.se/photos/PicturesSummary.php?ID=113&what=species)	Collete and Chao 1975
Sarda	orientalis	Actinopterygii	Scombriformes	Scombridae	fusiform	FALSE	41.3	36.16	10.733	7.7707	5.445							Randall 1997
Sarda	orientalis	Actinopterygii	Scombriformes	Scombridae	fusiform	FALSE	45.5143	39.8498	12.0096		6.264					Japan	Reported as proportions, data missing for some individuals. Total and standard length estimated from fork length using the proportions of the specimen of Sarda orientalis in Randall (1997)	Collete and Chao 1975
Sarda	orientalis	Actinopterygii	Scombriformes	Scombridae	fusiform	FALSE	49.7286	43.5396	13.4048		7.08					east-tropical Pacific	Reported as proportions, data missing for some individuals. Total and standard length estimated from fork length using the proportions of the specimen of Sarda orientalis in Randall (1997)	Collete and Chao 1975
Sarda	sarda	Actinopterygii	Scombriformes	Scombridae	fusiform	FALSE	54.822		11.1857									Zorica and Sinovčić 2008
Sarda	sarda	Actinopterygii	Scombriformes	Scombridae	fusiform	FALSE	46.1124		10.1646								females	Franičević et al. 2005
Sarda	sarda	Actinopterygii	Scombriformes	Scombridae	fusiform	FALSE	47.9006		10.6165								males	Franičević et al. 2005
Schedophilus	ovalis	Actinopterygii	Scombriformes	Centrolophidae	fusiform	FALSE	63.41	51.01	12.34	7.16	5.29				adult		Downloaded from FishBase at https://www.fishbase.se/photos/PicturesSummary.php?StartRow=2&ID=250&what=species&TotRec=5	Cambraia Duarte pers. comm. (FishBase)
Schedophilus	ovalis	Actinopterygii	Scombriformes	Centrolophidae	fusiform	FALSE	36.87	28.82	8.557	4.718	2.627					ESFM-PIS/2018-04		Akyol and Özgül 2018
Schedophilus	ovalis	Actinopterygii	Scombriformes	Centrolophidae	fusiform	FALSE	43.4	33.5	11.2		3.9					Individual 1		Mytilineou et al. 2013
Schedophilus	ovalis	Actinopterygii	Scombriformes	Centrolophidae	fusiform	FALSE	73	56.5	17.8		6.1					Individual 2		Mytilineou et al. 2013
Schedophilus	ovalis	Actinopterygii	Scombriformes	Centrolophidae	fusiform	FALSE	55.5	42.5	13.7		5					Individual 3		Mytilineou et al. 2013
Schedophilus	ovalis	Actinopterygii	Scombriformes	Centrolophidae	fusiform	FALSE	48.8	35.7	12.7		4					Individual 4		Mytilineou et al. 2013
Schedophilus	ovalis	Actinopterygii	Scombriformes	Centrolophidae	fusiform	FALSE	42.2	32.8	11		3.8					Individual 5		Mytilineou et al. 2013
Schedophilus	ovalis	Actinopterygii	Scombriformes	Centrolophidae	fusiform	FALSE	76	58.9	18.7		6.5					Individual 6		Mytilineou et al. 2013
Scomber	australasicus	Actinopterygii	Scombriformes	Scombridae	fusiform	FALSE	29.2	24.97	6.88	5.3	3.25						Standard length measured to base of caudal fin. Identified as S. japonicus in FishBase at the time of this writing but Indian Ocean records of S. japonicus have been transferred to S. australasicus	Randall 1997
Scomber	australasicus	Actinopterygii	Scombriformes	Scombridae	fusiform	FALSE	25.3	21.55	7.62	4.82	3.07						Standard length measured to base of caudal fin. Identified as S. japonicus in FishBase at the time of this writing but Indian Ocean records of S. japonicus have been transferred to S. australasicus	Randall 1997
Scomber	australasicus	Actinopterygii	Scombriformes	Scombridae	fusiform	FALSE	24.4	22.5	6.54	4.65	2.85						Standard length measured to base of caudal fin. Identified as S. japonicus in FishBase at the time of this writing but Indian Ocean records of S. japonicus have been transferred to S. australasicus	Randall 1997
Scomber	scomber	Actinopterygii	Scombriformes	Scombridae	fusiform	FALSE	34.8	29.374	6.599	4.337	2.895							Cengiz 2020
Scomberomorus	cavalla	Actinopterygii	Scombriformes	Scombridae	elongate	FALSE	118.11	85.6341	21.59		12.446	6.096					Female specimen in this paper. Standard length using equation from Beaumariage (1973)	Butz and Mansueti 1962
Scomberomorus	cavalla	Actinopterygii	Scombriformes	Scombridae	elongate	FALSE	120.65	85.8659	21.844		12.7	6.096					Specimen of unknown sex in this paper. Standard length using equation from Beaumariage (1973)	Butz and Mansueti 1962
Scomberomorus	commerson	Actinopterygii	Scombriformes	Scombridae	fusiform	FALSE	47.912	40.142	9.02	6.899	4.221							Randall 1997, Mihalitsis and Bellwood 2019
Scomberomorus	commerson	Actinopterygii	Scombriformes	Scombridae	fusiform	FALSE	64.8	56.4	11.037	7.82	5.634							Randall 1997, Mihalitsis and Bellwood 2019
Scomberomorus	commerson	Actinopterygii	Scombriformes	Scombridae	fusiform	FALSE	88.584	72.8	15.9	11.855	8.631							Randall 1997, Mihalitsis and Bellwood 2019
Scomberomorus	guttatus	Actinopterygii	Scombriformes	Scombridae	fusiform	FALSE	48.8	39.139	8.865	6.903	5.076							Randall 1997
Scomberomorus	maculatus	Actinopterygii	Scombriformes	Scombridae	elongate	FALSE	73.5	61.5	13.3	7.39	6.85	3.708				FSBC 6412		Present Study
Scomberomorus	munroi	Actinopterygii	Scombriformes	Scombridae	elongate	FALSE	80.985	67.509	14.184	10.784	7.6					AMS I.21029-001	Standard length measured to base of caudal fin	Collette and Russo 1980
Scomberomorus	munroi	Actinopterygii	Scombriformes	Scombridae	elongate	FALSE	59.4911		10.7198		5.59364						Total length calculated from proportions in figured specimen, as total length was not reported	Collette and Russo 1980
Scomberomorus	niphonius	Actinopterygii	Scombriformes	Scombridae	elongate	FALSE	78.93	66.559	13.571	10.327	7.195					USNM uncatalogued	Standard length measured to base of caudal fin	Collette and Russo 1980
Scomberomorus	niphonius	Actinopterygii	Scombriformes	Scombridae	elongate	FALSE	36.2558		7.30634		4.07072						Total length calculated from fork length using the equations of Xu et al. (2016)	Collette and Russo 1980
Scomberomorus	regalis	Actinopterygii	Scombriformes	Scombridae	elongate	FALSE	67	55.8	13.1	8.47	6.79	3.266				FSBC 6404		Present Study
Scombrolabrax	heterolepis	Actinopterygii	Scombriformes	Scombrolabracidae	fusiform	FALSE	22.1	18.85	6.5221	3.72	2.92175						Caudal fin damaged	Bineesh et al. 2012b
Scombrolabrax	heterolepis	Actinopterygii	Scombriformes	Scombrolabracidae	fusiform	FALSE	14.294	12.16	4.005	3.03	1.859					KAUM-I 113237		Hata et al. 2019
Scombrolabrax	heterolepis	Actinopterygii	Scombriformes	Scombrolabracidae	fusiform	FALSE	29.122	23.89	6.758	4.548	2.929					TAMAR 030		Carvalho-Filho et al. 2010
Scombrolabrax	heterolepis	Actinopterygii	Scombriformes	Scombrolabracidae	fusiform	FALSE	18.662	16.36	5.186	4.104	2.025					MNRJ 33610		Carvalho-Filho et al. 2010
[truncated: 1,189 more rows]
