# Supplementary material for: Giant, swimming mouths: oral dimensions of extant sharks do not accurately predict body size in Dunkleosteus terrelli (Placodermi: Arthrodira)
Source: PeerJ. 2023 Apr 10;11:e15131. doi: 10.7717/peerj.15131 (PMC10100833; doi:10.7717/peerj.15131)
Supplement: Supplemental Information 2 — Estimates of fork and precaudal length as described in the Materials and Method section. [file peerj-11-15131-s002.xlsx]

## Sheet: Sheet1
Species	TBL(cm)	UJP(cm)	Fork Length (cm)	Precaudal Length (cm)
Carcharodon_carcharias	227	40.1	208.589	182.261
Carcharodon_carcharias	262	41.7	241.636	212.459
Carcharodon_carcharias	182.5	26.2	166.572	143.865
Carcharodon_carcharias	170.2	30.1	154.959	133.253
Carcharodon_carcharias	124.5	22.4	111.809	93.8223
Carcharodon_carcharias	243.8	41.8	224.452	196.756
Carcharodon_carcharias	379.1	60.3	352.202	313.494
Carcharodon_carcharias	154.9	25.4	140.512	120.052
Carcharodon_carcharias	523.2	99	488.261	437.826
Carcharodon_carcharias	563.2	96.7	526.029	472.338
Carcharodon_carcharias	487.7	80.5	454.742	407.196
Carcharodon_carcharias	237	38.5	218.031	190.889
Carcharodon_carcharias	281.9	46.5	260.426	229.629
Carcharodon_carcharias	134.6	23	121.345	102.537
Carcharodon_carcharias	535.9	90.5	500.253	448.783
Carcharodon_carcharias	594.4	89.2	555.488	499.258
Carcharodon_carcharias	457.2	79.8	425.944	380.88
Carcharodon_carcharias	473.7	91.5	441.523	395.116
Carcharodon_carcharias	553.7	85.5	517.059	464.142
Carcharodon_carcharias	166.37	26.3	151.342	129.948
Isurus_paucus	156.4	27.8		124.258
Isurus_paucus	220	35.2		176.741
Isurus_paucus	265.1	46.7		213.957
Isurus_paucus	426.7	72.2		347.31
Isurus_paucus	126.1	23.1		99.2544
Isurus_paucus	272	45.3		219.651
Isurus_paucus	384.81	64.5		312.742
Isurus_paucus	228.6	39.4		183.837
Isurus_paucus	242	43.4		194.895
Isurus_paucus	251.46	43.8		202.701
Isurus_paucus	320	57.3		259.261
Isurus_paucus	220.98	37		177.549
Isurus_paucus	224.16	37.7		180.174
Isurus_paucus	285.75	50.5		230.998
Isurus_paucus	243.84	42		196.413
Isurus_paucus	262.89	42.3		212.134
Isurus_paucus	205.7	36.5		164.94
Isurus_paucus	254	43.2		204.798
Isurus_paucus	248.48	47.3		200.242
Isurus_oxyrinchus	259.1	47.2	238.89	212.801
Isurus_oxyrinchus	251	50	231.368	206.062
Isurus_oxyrinchus	198.12	33.9	182.264	162.066
Isurus_oxyrinchus	264.16	44.5	243.589	217.011
Isurus_oxyrinchus	239.4	41.3	220.597	196.411
Isurus_oxyrinchus	303.53	54.3	280.148	249.767
Isurus_oxyrinchus	320.04	56.8	295.479	263.503
Isurus_oxyrinchus	320	58	295.442	263.47
Isurus_oxyrinchus	276.86	51	255.382	227.578
Isurus_oxyrinchus	254	41	234.154	208.558
Isurus_oxyrinchus	228.6	43.2	210.568	187.425
Isurus_oxyrinchus	259.1	45.7	238.89	212.801
Isurus_oxyrinchus	259	47.1	238.797	212.718
Isurus_oxyrinchus	251.5	46	231.833	206.478
Isurus_oxyrinchus	254	43.2	234.154	208.558
Isurus_oxyrinchus	274.3	47.2	253.005	225.448
Isurus_oxyrinchus	264.16	49	243.589	217.011
Isurus_oxyrinchus	190.5	33.5	175.188	155.726
Isurus_oxyrinchus	177	31.8	162.652	144.494
Isurus_oxyrinchus	136	23.9	124.579	110.382
Isurus_oxyrinchus	163	28	149.652	132.846
Isurus_oxyrinchus	181	35.1	166.366	147.822
Isurus_oxyrinchus	246	45.5	226.725	201.902
Carcharhinus_acronotus	107	13.3	89.042	67.1323
Carcharhinus_acronotus	111	12.9	92.41	70.2552
Carcharhinus_acronotus	94.1	10.5	78.1802	57.0611
Carcharhinus_acronotus	117.6	13.8	97.9672	75.4079
Carcharhinus_acronotus	108	13.3	89.884	67.913
Carcharhinus_acronotus	120.4	13.9	100.325	77.5939
Carcharhinus_acronotus	129	15.3	107.566	84.308
Carcharhinus_acronotus	129	15.1	107.566	84.308
Carcharhinus_acronotus	87.6	9.1	72.7072	51.9865
Carcharhinus_acronotus	116	13.3	96.62	74.1587
Carcharhinus_acronotus	94	12.6	78.096	56.983
Carcharhinus_acronotus	120.6	13.8	100.493	77.75
Carcharhinus_acronotus	132	16.1	110.092	86.6501
Carcharhinus_acronotus	101	11.5	83.99	62.448
Carcharhinus_acronotus	81.3	8.9	67.4026	47.068
Carcharhinus_acronotus	88	10.9	73.044	52.2988
Carcharhinus_acronotus	114.7	13.5	95.5254	73.1438
Carcharhinus_acronotus	76	8.5	62.94	42.9302
Carcharhinus_acronotus	115	14.1	95.778	73.378
Carcharhinus_acronotus	116	13.4	96.62	74.1587
Carcharhinus_brevipinna	213	27.3	177.508	160.107
Carcharhinus_brevipinna	205	25.4	170.74	153.496
Carcharhinus_brevipinna	141	17.9	116.595	100.603
Carcharhinus_brevipinna	202	24	168.202	151.017
Carcharhinus_brevipinna	243.8	28.2	203.566	185.562
Carcharhinus_brevipinna	213	25.5	177.508	160.107
Carcharhinus_brevipinna	160	19.8	132.669	116.306
Carcharhinus_brevipinna	165	24.6	136.899	120.438
Carcharhinus_brevipinna	168	21.5	139.437	122.917
Carcharhinus_brevipinna	174	22.8	144.514	127.876
Carcharhinus_brevipinna	141	21.4	116.595	100.603
Carcharhinus_brevipinna	208	25.5	173.278	155.975
Carcharhinus_falciformis	186	18.8	153.366	139.206
Carcharhinus_falciformis	185	21.7	152.527	138.443
Carcharhinus_falciformis	244	30.2	202.016	183.481
Carcharhinus_falciformis	265	32	219.631	199.511
Carcharhinus_falciformis	92	12	74.5186	67.4504
Carcharhinus_falciformis	94	14.5	76.1962	68.9771
Carcharhinus_falciformis	151	19.5	124.008	112.489
Carcharhinus_falciformis	73.5	9.6	59.0008	53.3282
Carcharhinus_falciformis	119	15.5	97.1662	88.0611
Carcharhinus_falciformis	86.68	11.2	70.0562	63.3893
Carcharhinus_leucas	229	37	192.765	175.203
Carcharhinus_leucas	245	42.2	206.678	188.211
Carcharhinus_leucas	278	44.3	235.374	215.041
Carcharhinus_leucas	139.5	23.3	114.939	102.439
Carcharhinus_leucas	173.4	25.8	144.417	130
Carcharhinus_leucas	182	27.5	151.896	136.992
Carcharhinus_leucas	254.4	39.8	214.852	195.854
Carcharhinus_leucas	229.5	37.4	193.2	175.61
Carcharhinus_leucas	166.5	25	138.417	124.39
Carcharhinus_leucas	252	39.3	212.765	193.902
Carcharhinus_leucas	254	41	214.504	195.528
Carcharhinus_leucas	278	43.1	235.374	215.041
Carcharhinus_leucas	244	35.4	205.809	187.398
Carcharhinus_leucas	226	33.1	190.157	172.764
Carcharhinus_leucas	266.7	41.2	225.548	205.854
Carcharhinus_leucas	254	41	214.504	195.528
Carcharhinus_leucas	214	28.6	179.722	163.008
Carcharhinus_leucas	284.5	44.2	241.026	220.325
Carcharhinus_leucas	190.5	30	159.287	143.902
Carcharhinus_leucas	222	33.6	186.678	169.512
Carcharhinus_leucas	278	43	235.374	215.041
Carcharhinus_leucas	138	19.9	113.635	101.22
Carcharhinus_limbatus	181.4	25.5	152.511	132.333
Carcharhinus_limbatus	171	26.7	143.524	124.649
Carcharhinus_limbatus	165	26.4	138.34	120.217
Carcharhinus_limbatus	193.5	28.5	162.966	141.272
Carcharhinus_limbatus	78	12.3	63.1677	55.941
Carcharhinus_limbatus	158.5	27.2	132.724	115.414
Carcharhinus_limbatus	128.5	18.6	106.802	93.2504
Carcharhinus_limbatus	176	26.1	147.845	128.343
Carcharhinus_limbatus	169	24	141.796	123.172
Carcharhinus_limbatus	177.8	26.8	149.4	129.673
Carcharhinus_limbatus	150	24.1	125.379	109.135
Carcharhinus_limbatus	201.9	26.6	170.224	147.478
Carcharhinus_limbatus	170	27.3	142.66	123.911
Carcharhinus_limbatus	176.5	26.8	148.277	128.713
Carcharhinus_limbatus	124	19.5	102.914	89.9258
Carcharhinus_limbatus	150	21.5	125.379	109.135
Carcharhinus_limbatus	185.4	26.2	155.967	135.288
Carcharhinus_limbatus	193	28	162.533	140.903
Carcharhinus_limbatus	115	18	95.1376	83.2766
Carcharhinus_limbatus	136	22.1	113.283	98.7914
Carcharhinus_obscurus	320	45.1	261.83	239.47
Carcharhinus_obscurus	300.9	45.7	246.168	224.954
Carcharhinus_obscurus	313	45.9	256.09	234.15
Carcharhinus_obscurus	307	40.2	251.17	229.59
Carcharhinus_obscurus	295	38.1	241.33	220.47
Carcharhinus_obscurus	153	21.2	124.89	112.55
Carcharhinus_obscurus	229	28.3	187.21	170.31
Carcharhinus_obscurus	334	41.2	273.31	250.11
Carcharhinus_obscurus	320	40.7	261.83	239.47
Carcharhinus_obscurus	256.5	34.2	209.76	191.21
Carcharhinus_obscurus	320	44.6	261.83	239.47
Carcharhinus_obscurus	294	38.5	240.51	219.71
Carcharhinus_obscurus	323.9	43.4	265.028	242.434
Carcharhinus_obscurus	182.9	26.3	149.408	135.274
Carcharhinus_obscurus	340.4	46.5	278.558	254.974
Carcharhinus_obscurus	386.1	46.3	316.032	289.706
Carcharhinus_obscurus	310	41.5	257.086	231.87
Carcharhinus_plumbeus	182	27.3	146.218	137.997
Carcharhinus_plumbeus	182	25.6	146.218	137.997
Carcharhinus_plumbeus	165	23.7	132.32	124.635
Carcharhinus_plumbeus	212	27.3	170.743	161.577
Carcharhinus_plumbeus	182	27.3	146.218	137.997
Carcharhinus_plumbeus	186	22.1	149.488	141.141
Carcharhinus_plumbeus	95.6	11.5	75.5855	70.0866
Carcharhinus_plumbeus	86.8	11	68.3915	63.1698
Carcharhinus_plumbeus	202	28	162.567	153.717
Carcharhinus_plumbeus	198.12	28.3	159.396	150.667
Carcharhinus_plumbeus	165.1	25.1	132.402	124.714
Carcharhinus_plumbeus	185	27.8	148.67	140.355
Carcharhinus_plumbeus	208	29.6	167.472	158.433
Carcharhinus_plumbeus	196	28.2	157.662	149.001
Carcharhinus_plumbeus	167	23.9	133.955	126.207
Carcharhinus_plumbeus	191	28.4	153.575	145.071
Carcharhinus_plumbeus	192	26.9	154.393	145.857
Carcharhinus_plumbeus	194	29.3	156.028	147.429
Carcharhinus_plumbeus	181	30.7	145.4	137.211
Carcharhinus_plumbeus	153	25.4	122.51	115.203
Carcharhinus_plumbeus	182	26.2	146.218	137.997
Carcharhinus_plumbeus	166	24	133.138	125.421
Carcharhinus_plumbeus	183	29.5	147.035	138.783
Negaprion_brevirostris	170	28.3	144.79	131.06
Negaprion_brevirostris	260	37.8	221.29	200.36
Negaprion_brevirostris	243	34.7	206.84	187.27
Negaprion_brevirostris	116	18.6	98.89	89.48
Negaprion_brevirostris	268	40.6	228.09	206.52
Negaprion_brevirostris	232	39.5	197.49	178.8
Negaprion_brevirostris	240	35	204.29	184.96
Negaprion_brevirostris	198	30.6	168.59	152.62
Negaprion_brevirostris	68.5	10.3	58.515	52.905
Negaprion_brevirostris	213.4	39.7	181.68	164.478
Galeocerdo_cuvier	327	54	273.131	251.677
Galeocerdo_cuvier	71.12	10.3	48.9547	41.7841
Galeocerdo_cuvier	212.3	26.4	172.643	157.591
Galeocerdo_cuvier	235	30.6	192.53	176.211
Galeocerdo_cuvier	335	41	280.14	258.239
Galeocerdo_cuvier	218.3	27.7	177.899	162.513
Galeocerdo_cuvier	300	43	249.476	229.529
Galeocerdo_cuvier	78.8	9.8	55.6832	48.0838
Galeocerdo_cuvier	219	27.9	178.512	163.087
Galeocerdo_cuvier	185	25.2	148.725	135.197
Galeocerdo_cuvier	337.72	51.2	282.523	260.47
Galeocerdo_cuvier	378.46	52.6	318.215	293.888
Galeocerdo_cuvier	358.14	49.7	300.413	277.22
Galeocerdo_cuvier	208.28	29	169.121	154.293
Galeocerdo_cuvier	186.7	22.1	150.214	136.592
Galeocerdo_cuvier	151	19	118.938	107.308
Galeocerdo_cuvier	182	24.3	146.097	132.736
Galeocerdo_cuvier	95	11.2	69.876	61.3723
Galeocerdo_cuvier	138	17.5	107.548	96.6442
Galeocerdo_cuvier	358.14	51.9	300.413	277.22
Galeocerdo_cuvier	136	17.7	105.796	95.0037
Galeocerdo_cuvier	332	52.1	277.512	255.778
Sphyrna_lewini	246.4	23.5	190.795	173.833
Sphyrna_lewini	277.5	26.5	214.916	195.862
Sphyrna_lewini	230.5	21.8	178.463	162.57
Sphyrna_lewini	277	26.4	214.528	195.508
Sphyrna_lewini	326	29.8	252.532	230.216
Sphyrna_lewini	100	10.6	77.2468	70.1328
Sphyrna_lewini	161	15.8	124.558	113.341
Sphyrna_lewini	205	20.7	158.685	144.508
Sphyrna_lewini	165	16.8	127.661	116.174
Sphyrna_lewini	250	23.5	193.587	176.383
Sphyrna_lewini	167	16.4	129.212	117.591
Sphyrna_lewini	258	24.4	199.792	182.049
Sphyrna_lewini	301	27.6	233.142	212.508
Sphyrna_lewini	127	13.2	98.188	89.2578
Sphyrna_mokarran	414	58.2	318.155	293.294
Sphyrna_mokarran	208	24.5	158.465	143.21
Sphyrna_mokarran	350	41	268.543	246.666
Sphyrna_mokarran	205	22.7	156.14	141.024
Sphyrna_mokarran	314	36.6	240.636	220.438
Sphyrna_mokarran	257	28.4	196.45	178.909
Sphyrna_mokarran	246	25	187.922	170.895
Sphyrna_mokarran	298	32.9	228.233	208.781
Sphyrna_mokarran	319	36.5	244.512	224.08
Sphyrna_mokarran	255	27.8	194.899	177.452
Sphyrna_mokarran	302	31.2	231.333	211.695
Sphyrna_mokarran	300	40.5	229.783	210.238
Sphyrna_mokarran	365	29.5	280.171	257.594
