# Supplementary material for: Giant, swimming mouths: oral dimensions of extant sharks do not accurately predict body size in Dunkleosteus terrelli (Placodermi: Arthrodira)
Source: PeerJ. 2023 Apr 10;11:e15131. doi: 10.7717/peerj.15131 (PMC10100833; doi:10.7717/peerj.15131)
Supplement: Supplemental Information 3 [file peerj-11-15131-s003.xlsx]

## Sheet: Sheet1
specimen	taxon	mouth_width	UJP	total_length	precaudal_length	mouth_length
FSBC 06415	Galeocerdo cuvieri	39.5	53.5	362	280	18.5
FSBC 00844	Carcharhinus leucas	21.7	38	198.12	#N/A	12.5
FSBC 00884	Carcharhinus leucas	24.2	35.5	234.95	#N/A	11.8
FSBC 02127	Galeocerdo cuvieri	16.2	22	168.91	#N/A	7
FSBC 18083	Carcharhinus leucas	5.98	13.75	64	#N/A	6.07
